# Supplementary material for: Age-Dependent Molecular and Metabolic Rewiring Leading to Wound-Induced Blackening in Cut Carrots
Source: Preprints.org preprint supplement (doi:10.20944/preprints202306.0225.v1), 2023-06-04
Supplement: Supplementary file 12 [file cells-2456566 Supplementary Table S1.xlsx]

## Sheet: B_CT
Table 1A. Differentially expressed sequences in blackened vs control section (B_CT).
LOCUS	ANNOTATION	LOG2(FC)	padj.
LOC108224502	NADP-dependent D-sorbitol-6-phosphate dehydrogenase-like	11.8736	6.44625714459782e-08
LOC108203059	PLANT CADMIUM RESISTANCE 3-like	11.1347	6.44625714459782e-08
LOC108206216	abrin-b-like	10.6406	1.2166407343773e-07
LOC108204403	protein indeterminate-domain 12-like	10.247	1.2166407343773e-07
LOC108204509	polygalacturonase At1g48100	9.50705	1.2166407343773e-07
LOC108221000	uncharacterized protein LOC108221000	9.44032	1.51977862737414e-05
LOC108194334	nucleoside diphosphate kinase 1-like	9.26407	4.70856824660905e-05
LOC108204829	auxin-responsive protein IAA26-like	9.19373	4.70856824660905e-05
LOC108224308	germin-like protein subfamily 3 member 2	9.1563	6.31500980221989e-105
LOC108220175	carboxylesterase 1-like	9.15001	3.17784317758552e-34
LOC108215310	carotenoid cleavage dioxygenase 8	9.06823	4.13153508249956e-18
LOC108199497	uncharacterized protein L	8.99953	4.13153508249956e-18
LOC108206937	agamous-like MADS-box protein AGL9	8.9289	1.04838158557862e-20
LOC108225430	dehydration-responsive element-binding protein 1B-like	8.79562	1.73164908296074e-25
LOC108217814	probable transcription factor KAN4	8.62775	0.00194540223329736
LOC108213048	ethylene-responsive transcription factor ERF039-like	8.59603	0.00194540223329736
LOC108217410	uncharacterized protein LOC108217410	8.58726	0.00194540223329736
LOC108221941	thaumatin-like protein 1b	8.24172	0.00251874664643866
LOC108217036	uncharacterized protein LOC108217036	8.22401	0.00251874664643866
LOC108206177	AP2-like ethylene-responsive transcription factor TOE3	8.07098	0.00331722908826573
LOC108200819	cytokinin riboside 5\\'-monophosphate phosphoribohydrolase LOG1-like	8.03497	1.55585767320084e-05
LOC108197673	ethylene-responsive transcription factor ERF061	7.98143	1.55585767320084e-05
LOC108212010	bidirectional sugar transporter SWEET1-like	7.96349	6.11181538221657e-75
LOC108212022	bidirectional sugar transporter SWEET1-like	7.96349	0.00738022648642181
LOC108198322	ribosome-inactivating protein luffin-alpha-like	7.86521	1.42206292978078e-24
LOC108212759	probable protein phosphatase 2C 6	7.83885	4.54189363835309e-22
LOC108197197	protein phosphatase 1 regulatory subunit 12A-like	7.66514	4.54189363835309e-22
LOC108227159	protein O-linked-mannose beta-1,4-N-acetylglucosaminyltransferase 2-like	7.6317	4.54189363835309e-22
LOC108213508	NAC domain-containing protein 104-like	7.6023	0.00191708491088254
LOC108199823	F-box protein CPR30-like	7.57212	1.01899198724818e-09
LOC108216446	monoterpene synthase-like	7.46981	5.85693265112369e-22
LOC108224350	protein NRT1/ PTR FAMILY 6.4-like	7.44582	3.88669926929435e-12
LOC108225461	protein CUP-SHAPED COTYLEDON 1-like	7.38985	3.88669926929435e-12
LOC108225576	salicylate carboxymethyltransferase-like	7.38827	3.32796597175197e-15
LOC108198722	thermospermine synthase ACAULIS5-like	7.36597	3.32796597175197e-15
LOC108216534	uncharacterized protein LOC108216534	7.36209	3.32796597175197e-15
LOC108211425	probable trehalose-phosphate phosphatase H	7.34699	2.65409238801291e-29
LOC108197877	nudix hydrolase 8-like	7.30851	7.58499286916339e-05
LOC108206843	transcription factor DIVARICATA-like	7.29522	3.63060580150082e-06
LOC108207864	mavicyanin-like	7.29153	1.39044126326743e-08
LOC108218092	uncharacterized protein LOC108218092	7.277	0.00927877968746911
LOC108224276	chaperone protein dnaJ A6, chloroplastic-like	7.25571	0.00031388178206705
LOC108193524	zinc-finger homeodomain protein 10-like	7.23423	0.00696404144239005
LOC108211900	protein LYK2	7.22203	0.00696404144239005
LOC108206390	homeobox-leucine zipper protein HAT7-like	7.21319	4.53362997814296e-06
LOC108211519	uncharacterized protein LOC108211519	7.19777	0.000143234005495022
LOC108215250	probable protein phosphatase 2C 50	7.18576	0.000575971234426381
LOC108211546	UPF0481 protein At3g47200-like	7.1441	2.14282050582248e-08
LOC108220772	dehydration-responsive element-binding protein 1A-like	7.12511	0.00204244374650148
LOC108195025	protein MIZU-KUSSEI 1	7.10513	3.640906102559e-71
LOC108219352	hippocampus abundant transcript-like protein 1	7.0648	3.640906102559e-71
LOC108194838	pEARLI1-like lipid transfer protein 3	7.0643	3.640906102559e-71
LOC108206826	proline dehydrogenase 1, mitochondrial-like	7.06045	6.7386727568996e-18
LOC108200435	amino acid permease 4-like	7.04678	1.09491479605109e-06
LOC108200648	lysine histidine transporter-like 6	7.03442	9.86978476032132e-05
LOC108227284	dehydration-responsive element-binding protein 1B-like	6.99787	0.00144191515938408
LOC108197654	thermospermine synthase ACAULIS5-like	6.97334	0.000112570851066506
LOC108216517	vestitone reductase-like	6.94847	3.52189681257244e-08
LOC108208509	zinc finger protein CONSTANS-LIKE 5-like	6.94741	1.2684831310593e-20
LOC108208337	uncharacterized protein LOC108208337	6.91248	1.24341783258049e-21
LOC108196145	WAT1-related protein At3g30340-like	6.88687	7.3841055349216e-05
LOC108195468	uncharacterized protein LOC108195468	6.82924	3.44923847880868e-12
LOC108219693	protein NUCLEAR FUSION DEFECTIVE 4-like	6.80042	1.38765342459133e-90
LOC108208171	F-box protein CPR30-like	6.79182	6.47075991669318e-11
LOC108222068	HVA22-like protein j	6.79033	0.00344593884278907
LOC108216740	23 kDa jasmonate-induced protein-like	6.75504	2.73268074517314e-12
LOC108208197	transcription factor PRE6-like	6.74798	3.3688434720015e-48
LOC108218106	uncharacterized protein LOC108218106	6.72022	3.3688434720015e-48
LOC108211322	sesquiterpene synthase 2-like	6.71346	7.51776386086693e-09
LOC108226335	transcription repressor OFP12-like	6.70793	7.51776386086693e-09
LOC108210607	ras-related protein RABA6a-like	6.69571	8.25221451225331e-250
LOC108198321	agglutinin-1-like	6.69014	2.64210681240055e-13
LOC108212562	superoxide dismutase	6.68868	2.64210681240055e-13
LOC108197038	zinc finger CCCH domain-containing protein 20	6.68054	4.54320613533505e-06
LOC108192834	protein DETOXIFICATION 40-like	6.66234	4.54320613533505e-06
LOC108220121	9-cis-epoxycarotenoid dioxygenase NCED1	6.65305	0.000119708428106516
LOC108227293	NDR1/HIN1-like protein 12	6.6451	6.93097463054109e-82
LOC108208276	uncharacterized protein LOC108208276	6.64013	1.26108134081479e-10
LOC108217839	dof zinc finger protein DOF1.2	6.63867	1.42353425633715e-09
LOC108211910	sesquiterpene synthase 2-like	6.63772	0.000132516202996804
LOC108224829	GDSL esterase/lipase At4g10955-like	6.62446	0.00651515175716581
LOC108209938	protein IQ-DOMAIN 14-like	6.62418	3.42197946986614e-05
LOC108221929	ethylene-responsive transcription factor ERF027-like	6.62287	3.42197946986614e-05
LOC108215055	protein FAF-like, chloroplastic	6.61943	5.2050984924206e-06
LOC108207259	thioredoxin M-type, chloroplastic-like	6.60276	1.51597357815063e-10
LOC108206001	protein NRT1/ PTR FAMILY 2.7-like	6.58665	1.05475697999148e-30
LOC108222002	uncharacterized protein LOC108222002	6.58544	2.59220550867875e-05
LOC108225326	pathogenesis-related protein PR-1-like	6.58031	2.59220550867875e-05
LOC108194693	protein FAR1-RELATED SEQUENCE 5-like	6.55603	2.59220550867875e-05
LOC108216624	organic cation/carnitine transporter 1-like	6.54596	2.59220550867875e-05
LOC108195451	gibberellin 2-beta-dioxygenase 2-like	6.53897	9.48335050876663e-17
LOC108217316	RNA-binding KH domain-containing protein PEPPER-like	6.53288	1.45552267860792e-07
LOC108225771	ethylene-responsive transcription factor ERF109-like	6.50099	0.00287155237968326
LOC108211632	1-aminocyclopropane-1-carboxylate synthase 3	6.49491	0.00431391861423059
LOC108204639	protein NRT1/ PTR FAMILY 1.2-like	6.48645	6.22702210270265e-12
LOC108209410	scarecrow-like protein 28	6.47623	0.00341865389626433
LOC108211478	UDP-glycosyltransferase 90A1-like	6.46002	2.37345188460712e-19
LOC108219782	transcription factor bHLH35-like	6.45796	0.000299525321470339
LOC108202089	uncharacterized protein LOC108202089	6.44716	1.17035164043931e-64
LOC108226063	probable LRR receptor-like serine/threonine-protein kinase At1g67720	6.43682	0.00635074381748339
LOC108217397	uncharacterized protein LOC108217397	6.42461	0.00635074381748339
LOC108224887	probable galacturonosyltransferase 15	6.41594	0.00635074381748339
LOC108226566	probable membrane-associated kinase regulator 5	6.40461	4.28481172507764e-27
LOC108209122	dof zinc finger protein DOF1.7-like	6.39902	5.89186102701397e-06
LOC108213437	ureide permease 1-like	6.39643	5.89186102701397e-06
LOC108199153	TVP38/TMEM64 family membrane protein slr0305-like	6.38745	5.89186102701397e-06
LOC108220296	F-box protein At5g51370-like	6.36933	5.89186102701397e-06
LOC108211777	dehydration-responsive element-binding protein 1A-like	6.36496	5.89186102701397e-06
LOC108205875	transcription factor MYB59-like	6.36255	5.89186102701397e-06
LOC108204935	zeaxanthin epoxidase, chloroplastic-like	6.35443	3.00328824955233e-10
LOC108214561	uncharacterized protein LOC108214561	6.35059	9.34381488118493e-07
LOC108225423	ethylene-responsive transcription factor ERF025-like	6.31583	1.09135240028587e-12
LOC108207046	uncharacterized protein LOC108207046	6.31311	2.8240305559144e-12
LOC108226810	transcription repressor OFP6	6.30866	2.21735088620892e-10
LOC108212090	putative SWI/SNF-related matrix-associated actin-dependent regulator of chromatin subfamily A member 3-like 1	6.29565	0.00716143055380654
LOC108211084	uncharacterized protein LOC108211084	6.27775	0.00106374277954997
LOC108210017	beta-amylase 3, chloroplastic	6.25392	4.95787417264062e-12
LOC108201888	ethylene-responsive transcription factor ERF109-like	6.24742	1.22921576329373e-05
LOC108216136	9-cis-epoxycarotenoid dioxygenase NCED3, chloroplastic	6.22917	1.22921576329373e-05
LOC108200804	photosynthetic NDH subunit of subcomplex B 5, chloroplastic	6.22765	1.14730444434959e-17
LOC108220601	9-cis-epoxycarotenoid dioxygenase NCED1, chloroplastic-like	6.20909	6.67117572474213e-08
LOC108220610	polygalacturonase inhibitor-like	6.20853	9.39438746813835e-78
LOC108210375	senescence-specific cysteine protease SAG39-like	6.20188	1.88172402036831e-13
LOC108213593	senescence-specific cysteine protease SAG39-like	6.20188	0.000378014057779195
LOC108224343	tyrosine-specific transport protein 2-like	6.20042	6.66278764093838e-19
LOC108225486	tyrosine-specific transport protein 2-like	6.18048	1.76887694479791e-06
LOC108199012	ethylene-responsive transcription factor ERF017-like	6.14549	7.97284216261959e-09
LOC108207385	uncharacterized protein LOC108207385	6.14039	4.82452897255372e-59
LOC108216728	RNA-binding protein 38-like	6.13935	7.91265161676608e-16
LOC108208827	protein NRT1/ PTR FAMILY 6.3-like	6.13702	3.2490088315401e-11
LOC108218375	heat shock protein 90-5	6.12948	5.4119758727994e-61
LOC108213507	protein LITTLE ZIPPER 3-like	6.12516	7.29079624415374e-06
LOC108209341	uncharacterized protein	6.10602	0.000655791250632576
LOC108206903	uncharacterized protein	6.10087	0.000655791250632576
LOC108194890	uncharacterized protein	6.0963	0.00148692895566127
LOC108194325	chaperone protein DnaJ-like	6.08852	0.00148692895566127
LOC108217033	uncharacterized protein	6.08707	3.93267111381253e-113
LOC108213045	putative dual specificity protein phosphatase DSP8	6.06734	0.00481171594415204
LOC108214526	uncharacterized protein	6.05764	6.9641852301641e-08
LOC108208323	uncharacterized protein	6.05734	6.39018662553937e-20
LOC108220577	transcription factor bHLH35-like	6.04627	6.39018662553937e-20
LOC108197682	21 kDa protein-like	6.02603	9.99898078901951e-20
LOC108193596	probable WRKY transcription factor 12	6.00552	0.00200344950213445
LOC108217759	NAC domain-containing protein 7	5.98851	0.00200344950213445
LOC108211262	uncharacterized protein LOC108211262	5.97236	1.35527435116241e-06
LOC108226677	dynein light chain LC6, flagellar outer arm-like	5.94221	3.21124567587788e-99
LOC108193257	SNF1-related protein kinase regulatory subunit gamma-1-like	5.94132	3.21124567587788e-99
LOC108206026	uncharacterized protein LOC108206026	5.93868	8.95398690835539e-29
LOC108206785	probable WRKY transcription factor 30	5.91441	8.95398690835539e-29
LOC108218778	uncharacterized protein LOC108218778	5.90255	7.95412325209905e-10
LOC108200654	phosphate transporter PHO1 homolog 1	5.8936	4.74541879393577e-06
LOC108213260	pathogenesis-related protein 5	5.89319	8.3379584983817e-07
LOC108221007	dehydration-responsive element-binding protein 1A-like	5.88809	2.37656411260702e-05
LOC108195253	uncharacterized protein LOC108195253	5.87263	9.18482331365009e-06
LOC108221055	putative F-box protein At1g20657	5.86356	2.36337946377318e-11
LOC108206391	homeobox-leucine zipper protein HAT7-like	5.84538	2.36337946377318e-11
LOC108225627	uncharacterized protein	5.84265	2.36337946377318e-11
LOC108222081	dehydration-responsive element-binding protein 1B-like	5.83465	7.75614853773813e-06
LOC108206207	nudix hydrolase 8-like	5.8317	1.88301844630461e-23
LOC108208154	protein TIFY 5A-like	5.82148	1.14675681061608e-16
LOC108204812	thiamine thiazole synthase 2	5.82022	1.38060934821268e-05
LOC108213467	E3 ubiquitin-protein ligase RDUF1-like	5.81709	1.53248617562432e-08
LOC108220040	probable beta-1,3-galactosyltransferase 2	5.81607	3.16405354385387e-14
LOC108208184	basic leucine zipper 43-like	5.81605	3.16405354385387e-14
LOC108226724	probable transcription factor KAN4	5.81459	3.16405354385387e-14
LOC108204526	uncharacterized protein LOC108204526	5.81295	3.16405354385387e-14
LOC108226076	probable protein phosphatase 2C 75	5.79939	4.74468925539849e-15
LOC108204706	GDSL esterase/lipase At1g28580	5.78885	5.0315676485137e-08
LOC108226908	uncharacterized protein LOC108226908	5.77437	1.42915609118452e-14
LOC108226833	auxin-responsive protein IAA1-like	5.7637	0.00246336028704394
LOC108213459	EID1-like F-box protein 3	5.75899	0.00246336028704394
LOC108215397	subtilisin-like protease SBT1.3	5.74746	0.000375807991797691
LOC108207509	protein DR_1172-like	5.7469	0.00450275244424092
LOC108194428	mitogen-activated protein kinase kinase 7-like	5.74144	0.00536679456971976
LOC108218638	phosphoethanolamine N-methyltransferase 1-like	5.73784	0.0010531871278532
LOC108205010	ABC transporter G family member 11-like	5.71695	2.08355012149516e-11
LOC108222114	1-aminocyclopropane-1-carboxylate oxidase	5.71409	0.000199736460491451
LOC108226018	protein SRG1	5.69346	1.90313639395274e-08
LOC108194180	putative small ubiquitin-related modifier 8	5.69143	8.62947526902792e-18
LOC108208080	uncharacterized protein LOC108208080	5.68988	2.56060467235022e-41
LOC108193256	SNF1-related protein kinase regulatory subunit gamma-1-like	5.68956	3.22719194394333e-25
LOC108195058	bidirectional sugar transporter SWEET15-like	5.68572	1.92204103240703e-20
LOC108207903	serine/threonine-protein phosphatase 7 long form homolog	5.68418	0.000138853603253828
LOC108213245	F-box/FBD/LRR-repeat protein At1g13570-like	5.65967	1.37428725848321e-38
LOC108207916	protein CUP-SHAPED COTYLEDON 3-like	5.65012	8.54702712244873e-45
LOC108195635	agamous-like MADS-box protein AGL15	5.62813	2.48168428026992e-07
LOC108222171	E3 ubiquitin-protein ligase SGR9, amyloplastic	5.61696	5.89079264188894e-06
LOC108225267	cytokinin riboside 5\\'-monophosphate phosphoribohydrolase LOG3-like	5.6123	2.23281430588793e-12
LOC108226082	uncharacterized protein LOC108226082	5.60935	1.17990861496496e-06
LOC108217208	protein ACCELERATED CELL DEATH 6-like	5.60031	0.0010216774115884
LOC108196996	chlorophyll a-b binding protein CP29.2,	5.59825	4.3754133416114e-14
LOC108195300	L-ascorbate oxidase homolog	5.59647	4.3754133416114e-14
LOC108201663	auxin-induced protein AUX18-like	5.59535	4.88717889438813e-34
LOC108194057	ferric reduction oxidase 2-like	5.58226	4.88717889438813e-34
LOC108219820	amino acid permease 6-like	5.57243	4.88717889438813e-34
LOC108213091	protein indeterminate-domain 9-like	5.56764	3.90678508353024e-05
LOC108226700	ethylene-responsive transcription factor WIN1-like	5.5611	0.00262736643818094
LOC108196115	uncharacterized protein LOC108196115	5.55753	0.00111769664397161
LOC108198664	ras-related protein RABA5e-like	5.55728	7.43840663915497e-41
LOC108213059	uncharacterized protein LOC108213059	5.55252	1.04073531492573e-06
LOC108208343	uncharacterized protein LOC108208343	5.53065	0.000146025852611965
LOC108224755	uncharacterized protein LOC108224755	5.51082	7.55632353471526e-05
LOC108208307	cysteine proteinase inhibitor 1-like	5.50804	6.49096517831236e-33
LOC108194676	agglutinin-1-like	5.49542	6.49096517831236e-33
LOC108220258	anthocyanidin 3-O-glucosyltransferase 2-like	5.49457	2.76970161817528e-06
LOC108225928	uncharacterized protein LOC108225928	5.49179	1.46691263050413e-11
LOC108196248	pyruvate, phosphate dikinase, chloroplastic	5.48988	0.000509293528771779
LOC108217407	uncharacterized protein LOC108217407	5.48289	0.000509293528771779
LOC108202548	transmembrane epididymal protein 1	5.48004	0.000509293528771779
LOC108217751	uncharacterized protein LOC108217751	5.47595	0.000509293528771779
LOC108204748	extra-large guanine nucleotide-binding protein 1-like	5.47561	0.000509293528771779
LOC108209360	photosystem II reaction center W protein, chloroplastic-like	5.4737	0.000602834712921568
LOC108220060	peroxidase A2-like	5.4647	2.75857220095168e-10
LOC108212092	putative SWI/SNF-related matrix-associated actin-dependent regulator of chromatin subfamily A member 3-like 1	5.45869	1.40330536901819e-07
LOC108198696	uncharacterized protein LOC108198696	5.45662	1.12623842032907e-07
LOC108195333	auxin transporter-like protein 2	5.45465	6.53909002777149e-05
LOC108218429	polygalacturonase	5.45103	8.57809707191107e-92
LOC108221595	dehydration-responsive element-binding protein 1B-like	5.44826	3.48259838753596e-38
LOC108196883	protein NSP-INTERACTING KINASE 1-like	5.44471	3.48259838753596e-38
LOC108211482	omega-hydroxypalmitate O-feruloyl transferase	5.43054	0.0012104427136324
LOC108202496	TMV resistance protein N-like	5.42349	3.67389083545316e-05
LOC108223046	glucan endo-1,3-beta-glucosidase 14-like	5.4029	7.02795260977527e-06
LOC108217736	uncharacterized protein LOC108217736	5.40258	2.12710270995274e-05
LOC108223902	nuclear transcription factor Y subunit C-2	5.39902	2.12710270995274e-05
LOC108197774	S-adenosylmethionine decarboxylase proenzyme 4-like	5.37656	2.12710270995274e-05
LOC108220111	CBL-interacting serine/threonine-protein kinase 6-like	5.37554	1.74855629582405e-06
LOC108199053	uncharacterized protein LOC108199053	5.37409	7.34128417785099e-07
LOC108198230	uncharacterized protein LOC108198230	5.37344	3.38439688698787e-18
LOC108200277	DUF724 domain-containing protein 3-like	5.37315	3.38439688698787e-18
LOC108203135	probable carotenoid cleavage dioxygenase 4, chloroplastic	5.37284	0.000237948042624167
LOC108197849	uncharacterized protein LOC108197849	5.36854	2.04901075804739e-17
LOC108194827	phospholipase A(1) DAD1, chloroplastic	5.36763	4.52300938980726e-06
LOC108205797	zinc finger protein CONSTANS-LIKE 2	5.36592	0.00345368053018931
LOC108205835	zinc finger protein CONSTANS-LIKE 2-like	5.36592	2.70206420331321e-23
LOC108222095	cytokinin dehydrogenase 1-like	5.35355	1.89192677536124e-07
LOC108213042	myb-like protein J	5.34976	6.41842239761071e-16
LOC108223029	uncharacterized protein LOC108223029	5.34691	2.06993138774897e-12
LOC108204913	peroxidase 42	5.34198	2.06993138774897e-12
LOC108216948	uncharacterized protein LOC108216948	5.33368	6.47589863821066e-17
LOC108213205	putative lipid-transfer protein DIR1	5.33171	0.000958078745921943
LOC108198818	ethylene-responsive transcription factor ERF062-like	5.32619	5.55772993951728e-12
LOC108194256	transcription factor bHLH93-like	5.31898	4.10510759366141e-15
LOC108193239	21 kDa protein	5.31549	4.56174750732982e-11
LOC108197503	auxin-responsive protein IAA12	5.31375	4.3023339931161e-09
LOC108222391	zinc-finger homeodomain protein 2-like	5.31001	4.3023339931161e-09
LOC108195493	ethylene-responsive transcription factor ERF021-like	5.30958	4.69036660289525e-18
LOC108198902	abrin-b-like	5.30249	4.69036660289525e-18
LOC108195381	probable calcium-binding protein CML25	5.29681	4.69036660289525e-18
LOC108207902	serine/threonine-protein phosphatase 7 long form homolog	5.29437	4.69036660289525e-18
LOC108212306	uncharacterized protein LOC108212306	5.29043	2.71868944757988e-15
LOC108223045	clathrin coat assembly protein AP180-like	5.28554	7.83318516516327e-18
LOC108221227	uncharacterized protein At2g33490-like	5.28216	1.04559434179477e-14
LOC108217880	uncharacterized protein LOC108217880	5.27484	2.37634933062809e-06
LOC108213479	pumilio homology domain family member 4	5.27203	9.81659951843712e-06
LOC108209898	vacuolar amino acid transporter 1-like	5.26649	1.59823079202656e-06
LOC108197655	30S ribosomal protein S1	5.26645	1.59823079202656e-06
LOC108210719	probable LRR receptor-like serine/threonine-protein kinase At5g48740	5.26516	1.59823079202656e-06
LOC108217897	uncharacterized protein LOC108217897	5.25674	1.59823079202656e-06
LOC108197272	uncharacterized protein LOC108197272	5.25249	1.59823079202656e-06
LOC108193989	derlin-1-like	5.2462	1.59823079202656e-06
LOC108202502	uncharacterized protein LOC108202502	5.24161	4.11036835902404e-06
LOC108196722	BTB/POZ domain-containing protein At3g50780-like	5.24004	2.68357909394877e-11
LOC108200415	lysine histidine transporter-like 6	5.23974	2.3386770053751e-19
LOC108208399	short-chain dehydrogenase TIC 32, chloroplastic-like	5.22832	2.3386770053751e-19
LOC108208321	LOW QUALITY PROTEIN: protein ABHD17B-like	5.21768	2.21479071483577e-08
LOC108218485	metacaspase-9	5.21765	2.50876306183507e-17
LOC108204876	transcription factor bHLH63-like	5.21732	1.05148575601588e-12
LOC108200516	uncharacterized protein sll0103-like	5.21629	7.98135356888579e-13
LOC108226521	NAC domain-containing protein 104	5.20481	7.98135356888579e-13
LOC108210030	armadillo repeat-containing kinesin-like protein 1	5.2018	9.13036257137266e-52
LOC108225466	salicylate carboxymethyltransferase-like	5.18817	1.56554854428832e-21
LOC108217872	homeobox-leucine zipper protein HAT22-like	5.18277	0.00902883024629477
LOC108223982	RHOMBOID-like protein 9, chloroplastic	5.15946	0.00902883024629477
LOC108201166	uncharacterized GPI-anchored protein At5g19250	5.15438	3.42211540878029e-05
LOC108219351	hippocampus abundant transcript 1 protein-like	5.15428	0.00458249184722664
LOC108202326	calcium permeable stress-gated cation channel 1-like	5.14842	0.00458249184722664
LOC108213290	monocopper oxidase-like protein SKU5	5.14248	0.000187633329070305
LOC108221881	DNA repair protein RAD16	5.13902	1.9324585880065e-07
LOC108222239	sodium/hydrogen exchanger 4	5.13842	1.30225996296968e-09
LOC108211384	LOW QUALITY PROTEIN: uncharacterized protein LOC108211384	5.12001	1.48642433186082e-05
LOC108208969	type 2 DNA topoisomerase 6 subunit B-like	5.11901	0.00310721647269177
LOC108222267	protein trichome birefringence-like 31	5.11228	0.00310721647269177
LOC108193287	uncharacterized protein LOC108193287	5.11048	0.00310721647269177
LOC108218047	protein MIZU-KUSSEI 1-like	5.10723	0.00310721647269177
LOC108205009	ABC transporter G family member 11-like	5.10575	0.00310721647269177
LOC108208346	protein LE25-like	5.10372	5.29576269800874e-07
LOC108227245	21 kDa protein-like	5.10136	2.56949464601059e-14
LOC108222038	auxin-responsive protein IAA1-like	5.10079	3.00948668755588e-13
LOC108211545	phosphatidylinositol 3,4,5-trisphosphate 3-phosphatase and protein-tyrosine-phosphatase PTEN2A-like	5.09432	1.60750728203253e-28
LOC108194283	uncharacterized protein LOC108194283	5.08433	1.60750728203253e-28
LOC108206962	glycerophosphodiester phosphodiesterase GDPDL6-like	5.08341	4.89018801569838e-11
LOC108206399	ACT domain-containing protein ACR8-like	5.07794	3.69723104811073e-29
LOC108223005	uncharacterized protein LOC108223005	5.07649	5.75351486080286e-14
LOC108214687	serine/threonine-protein kinase At5g01020-like	5.0763	5.75351486080286e-14
LOC108223513	chlorophyll a-b binding protein 37, chloroplastic	5.07541	2.45622779781494e-144
LOC108222156	dof zinc finger protein DOF1.6-like	5.0583	0.00157691816740118
LOC108211620	dof zinc finger protein DOF3.4-like	5.05249	8.6946546464693e-11
LOC108198969	F-box/kelch-repeat protein At3g61590-like	5.05088	0.00690308519139927
LOC108217312	uncharacterized protein LOC108217312	5.04994	1.833255818224e-09
LOC108212952	uncharacterized protein LOC108212952	5.04519	1.13603587694974e-07
LOC108227845	uncharacterized protein LOC108227845	5.0438	3.42865322397451e-20
LOC108211198	probable serine/threonine-protein kinase At5g41260	5.04337	2.97657300890521e-20
LOC108209491	uncharacterized membrane protein At1g16860	5.03133	2.97657300890521e-20
LOC108200202	uncharacterized protein LOC108200202	5.02406	0.00117363013720586
LOC108216442	GDSL esterase/lipase At4g10955-like	5.01563	0.000176235058358814
LOC108212319	protein GLUTAMINE DUMPER 6-like	5.0152	0.000176235058358814
LOC108194345	F-box protein At2g02240-like	5.01059	0.000176235058358814
LOC108211886	protein NRT1/ PTR FAMILY 1.2-like	5.00799	6.65921141952103e-40
LOC108225254	UDP-glycosyltransferase 86A1	5.00167	6.65921141952103e-40
LOC108209842	ribulose bisphosphate carboxylase/oxygenase activase, chloroplastic-like	5.00079	2.33207071789705e-16
LOC108206455	glycine cleavage system H protein, mitochondrial	4.99593	2.33207071789705e-16
LOC108225440	protein CIA1-like	4.99345	8.34117231458801e-06
LOC108208252	ethylene-responsive transcription factor ERF027-like	4.99183	0.000230623278432239
LOC108218475	uncharacterized protein LOC108218475	4.98986	0.000230623278432239
LOC108217806	transcription factor PAR1	4.98423	4.6509876872109e-19
LOC108198803	SNF1-related protein kinase regulatory subunit gamma-1-like	4.98391	9.39806864336008e-21
LOC108213453	dehydration-responsive element-binding protein 1B-like	4.98222	2.33380888397881e-19
LOC108217834	uncharacterized protein LOC108217834	4.98056	1.88632344961393e-20
LOC108198728	LOW QUALITY PROTEIN: G-type lectin S-receptor-like serine/threonine-protein kinase SD2-5	4.97519	1.66209081005367e-16
LOC108220809	cell division control protein 6 homolog B	4.97281	0.00879219159815968
LOC108224507	protein WALLS ARE THIN 1-like	4.96933	1.30479232360697e-13
LOC108209268	putative receptor-like protein kinase At3g47110	4.96785	1.94803611470946e-30
LOC108215147	uncharacterized protein LOC108215147	4.9669	2.81607054155816e-06
LOC108215654	uncharacterized protein LOC108215654	4.96009	1.22520261195852e-27
LOC108227242	probable pectinesterase/pectinesterase inhibitor 59	4.94338	2.69637993661178e-05
LOC108195329	F-box protein CPR30-like	4.92603	1.63704214187857e-39
LOC108216750	uncharacterized GPI-anchored protein At4g28100	4.92494	7.87720158922987e-05
LOC108217937	RING-H2 finger protein ATL74-like	4.92403	3.46828076991769e-08
LOC108199870	type IV inositol polyphosphate 5-phosphatase 3-like	4.92376	8.91863351642938e-05
LOC108222023	NAC domain-containing protein 37	4.9218	8.91863351642938e-05
LOC108196387	uncharacterized protein LOC108196387	4.91962	8.91863351642938e-05
LOC108214317	probable RNA-dependent RNA polymerase 3	4.8921	8.91863351642938e-05
LOC108214873	uncharacterized protein LOC108214873	4.87563	8.91863351642938e-05
LOC108226821	phosphatidylinositol 4-phosphate 5-kinase 4	4.86827	1.46775885428772e-61
LOC108221621	zinc finger MYM-type protein 1-like	4.86808	0.00376711998874105
LOC108200834	uncharacterized protein slp1	4.86402	5.40427657603125e-05
LOC108196010	uncharacterized protein LOC108196010	4.85866	5.40427657603125e-05
LOC108214895	probable purine permease 4	4.85226	6.66604617608931e-11
LOC108215533	serine/threonine-protein kinase STY46-like	4.84865	1.6463750033689e-20
LOC108217669	uncharacterized protein LOC108217669	4.84538	0.000285806564447949
LOC108210994	photosystem I reaction center subunit XI, chloroplastic	4.84489	0.00780354831008326
LOC108224118	myb-related protein Myb4-like	4.84245	1.92686479325155e-05
LOC108199521	putative F-box/LRR-repeat protein 23	4.84217	7.49375707574609e-06
LOC108210414	UPF0481 protein At3g47200-like	4.84211	0.00109344578548474
LOC108202104	F-box protein At5g07610-like	4.84164	4.64732277536037e-88
LOC108204939	probable galactinol--sucrose galactosyltransferase 2	4.83693	0.000127278347683474
LOC108208934	G-type lectin S-receptor-like serine/threonine-protein kinase B120	4.83618	2.17637749230178e-71
LOC108212252	uncharacterized protein LOC108212252	4.83618	6.7100652636961e-05
LOC108226109	uncharacterized protein LOC108226109	4.83191	0.00130571531397322
LOC108227783	glucan endo-1,3-beta-glucosidase 8-like	4.82801	0.00130571531397322
LOC108213398	heavy metal-associated isoprenylated plant protein 20	4.82593	4.43967504130308e-06
LOC108214313	anthocyanidin 3-O-glucosyltransferase 2-like	4.82375	6.59088810863722e-242
LOC108206885	ATPase GET3-like	4.82213	5.80595968912204e-10
LOC108214642	subtilisin-like protease SBT1.7	4.821	0.00550177258127693
LOC108224474	F-box protein CPR30-like	4.82071	0.00636561658345431
LOC108204248	formin-like protein 11	4.80145	0.000574576627069449
LOC108216764	aspartic proteinase nepenthesin-1	4.79381	8.02261352208452e-66
LOC108213441	subtilisin inhibitor-like	4.79055	8.02261352208452e-66
LOC108200822	heavy metal-associated isoprenylated plant protein 3-like	4.78884	0.00973928671760925
LOC108218699	cation/H(+) antiporter 2-like	4.78846	1.90594259850088e-08
LOC108197734	NAC domain-containing protein 7-like	4.7836	0.00401744113036824
LOC108209397	O-glucosyltransferase rumi homolog	4.77089	0.000120686117150978
LOC108222612	probable indole-3-pyruvate monooxygenase YUCCA10	4.76046	0.000120686117150978
LOC108206980	uncharacterized protein LOC108206980	4.76004	0.000120686117150978
LOC108205188	BURP domain-containing protein 3-like	4.75815	7.32399022870861e-36
LOC108194309	uncharacterized protein LOC108194309	4.75455	0.000568008592601437
LOC108226996	uncharacterized protein LOC108226996	4.75431	8.01403748961122e-05
LOC108201933	ethylene-responsive transcription factor 13-like	4.75378	2.17289555860723e-06
LOC108219778	homeobox-leucine zipper protein GLABRA 2-like	4.75024	2.17289555860723e-06
LOC108209926	inorganic phosphate transporter 1-4-like	4.75014	2.17289555860723e-06
LOC108212693	uncharacterized protein LOC108212693	4.74934	3.03275315987164e-94
LOC108197878	protein DETOXIFICATION 51	4.74806	3.03275315987164e-94
LOC108218656	phototropin-1-like	4.74611	3.03275315987164e-94
LOC108210081	transcription factor MYB59	4.74501	3.03275315987164e-94
LOC108201974	uncharacterized protein LOC108201974	4.74017	3.03275315987164e-94
LOC108227078	uncharacterized protein LOC108227078	4.73937	3.03275315987164e-94
LOC108212775	receptor-like protein 12	4.73907	3.03275315987164e-94
LOC108200361	protein MARD1-like	4.73232	3.03275315987164e-94
LOC108216150	pleiotropic drug resistance protein 1-like	4.72905	3.03275315987164e-94
LOC108226755	metacaspase-1-like	4.72591	0.000371361102855299
LOC108200261	uncharacterized protein LOC108200261	4.71521	1.0516189204218e-17
LOC108220359	uncharacterized protein LOC108220359	4.71052	3.36285539543173e-25
LOC108208484	uncharacterized protein LOC108208484	4.70264	0.000366760185981468
LOC108214289	expansin-A15	4.69905	0.00809394439563274
LOC108197743	adenine phosphoribosyltransferase 3-like	4.69837	0.00299048426462552
LOC108193571	inactive protein kinase SELMODRAFT_444075	4.69825	3.23320870905378e-25
LOC108208348	pistil-specific extensin-like protein	4.69568	1.96128133747737e-50
LOC108220247	uncharacterized protein LOC108220247	4.69318	5.39393347256024e-07
LOC108208464	uncharacterized protein LOC108208464	4.68707	0.000615088163372939
LOC108211811	ATP-dependent RNA helicase-like protein DB10	4.68467	1.62219906094095e-06
LOC108213772	carrot ABA-induced in somatic embryos 3	4.6809	0.00169444350397548
LOC108195153	zinc finger protein 354B-like	4.68081	3.15257859205761e-34
LOC108205062	probable xyloglucan endotransglucosylase/hydrolase protein 30	4.67833	3.15257859205761e-34
LOC108200848	purple acid phosphatase 23	4.67135	3.15257859205761e-34
LOC108206747	cold shock domain-containing protein 4	4.66942	3.15257859205761e-34
LOC108217702	uncharacterized protein LOC108217702	4.66541	3.15257859205761e-34
LOC108213316	transcription factor BEE 3-like	4.66189	8.6595111710229e-17
LOC108198782	protein BREVIS RADIX-like	4.65778	8.6595111710229e-17
LOC108199651	protein trichome birefringence-like 38	4.65742	0.000694680602552368
LOC108209739	photosystem I reaction center subunit III, chloroplastic	4.65466	0.000694680602552368
LOC108194015	thaumatin-like protein 1b	4.65441	2.36955021271993e-29
LOC108217737	RING-H2 finger protein ATL52	4.64963	5.18002338569454e-15
LOC108227521	sodium/hydrogen exchanger 2-like	4.64901	0.00652065061228747
LOC108195186	heavy metal-associated isoprenylated plant protein 3-like	4.6379	0.00652065061228747
LOC108203074	serine--glyoxylate aminotransferase	4.61942	3.03893640849061e-16
LOC108207172	glutathionyl-hydroquinone reductase YqjG	4.60532	1.61574427742337e-26
LOC108226543	probable sucrose-phosphate synthase 1	4.60522	1.92990463031422e-05
LOC108193941	cytochrome P450 85A1	4.60519	3.56990768180247e-07
LOC108197880	uncharacterized protein LOC108197880	4.60511	5.86428784863216e-11
LOC108223806	uncharacterized protein LOC108223806	4.59531	3.28906752492326e-09
LOC108212915	LRR receptor-like serine/threonine-protein kinase FLS2	4.59222	3.28906752492326e-09
LOC108208132	protein terminal ear1 homolog	4.58662	0.000121589198361305
LOC108226986	dirigent protein 1-like	4.58481	1.43273359051423e-07
LOC108196646	uncharacterized protein LOC108196646	4.58141	0.000107116961498019
LOC108213697	uncharacterized protein LOC108213697	4.57807	0.00228769699610386
LOC108227480	protein CIA1-like	4.57711	0.00423726978016733
LOC108222345	ethylene-responsive transcription factor ERF027-like	4.57314	9.26219189387716e-07
LOC108194152	protein PHYTOCHROME KINASE SUBSTRATE 1-like	4.57133	1.46607052181774e-09
LOC108222025	AP2-like ethylene-responsive transcription factor TOE3	4.57129	0.000331121416890233
LOC108200286	uncharacterized protein LOC108200286	4.56565	0.000331121416890233
LOC108202834	protein NRT1/ PTR FAMILY 1.2-like	4.56479	0.000331121416890233
LOC108201905	putative F-box protein At3g16210	4.54738	0.000331121416890233
LOC108193904	uncharacterized protein LOC108193904	4.54687	2.02120336471221e-06
LOC108214375	squamosa promoter-binding-like protein 6	4.54322	2.02120336471221e-06
LOC108227811	CSC1-like protein RXW8	4.5426	2.02120336471221e-06
LOC108224228	uncharacterized protein LOC108224228	4.54071	2.02120336471221e-06
LOC108223948	uncharacterized protein LOC108223948	4.53022	1.54707066121362e-06
LOC108208613	CSC1-like protein At4g02900	4.52883	1.54707066121362e-06
LOC108197768	protein IQ-DOMAIN 14-like	4.52654	3.62090150768472e-08
LOC108225746	ABSCISIC ACID-INSENSITIVE 5-like protein 7	4.52336	5.12778714158808e-07
LOC108228152	ultraviolet-B receptor UVR8	4.52068	5.12778714158808e-07
LOC108211881	NAC domain-containing protein 8-like	4.50135	5.12778714158808e-07
LOC108202117	uncharacterized protein LOC108202117	4.50125	0.00163703949436919
LOC108199230	uncharacterized protein LOC108199230	4.4927	0.00163703949436919
LOC108205913	uncharacterized protein LOC108205913	4.49244	0.00163703949436919
LOC108199845	probably inactive leucine-rich repeat receptor-like protein kinase IMK2	4.49132	0.00163703949436919
LOC108210224	pleiotropic drug resistance protein 1-like	4.48959	8.55173434587216e-11
LOC108220607	protein WALLS ARE THIN 1-like	4.48724	8.06539523797118e-06
LOC108218739	transcriptional corepressor SEUSS-like	4.48389	2.11031552875356e-06
LOC108209818	uncharacterized protein LOC108209818	4.48169	1.80150540558641e-09
LOC108216452	probable protein phosphatase 2C 39	4.48003	0.0012797858787813
LOC108216699	homeobox-leucine zipper protein HDG11-like	4.47545	0.00471138839735041
LOC108217988	UDP-glycosyltransferase 89B2-like	4.47008	3.02312318419825e-12
LOC108203090	uncharacterized protein LOC108203090	4.46918	0.00288759402347988
LOC108226384	heptahelical transmembrane protein 4-like	4.4672	3.92797700746157e-10
LOC108205293	uncharacterized protein LOC108205293	4.46707	0.00523081304797389
LOC108194047	nuclear transcription factor Y subunit A-3	4.46558	0.00523081304797389
LOC108204851	galactan beta-1,4-galactosyltransferase GALS3-like	4.4652	0.00523081304797389
LOC108195356	ensconsin-like	4.46335	0.00523081304797389
LOC108211199	uncharacterized protein LOC108211199	4.45724	0.00523081304797389
LOC108197817	guanine nucleotide-binding protein subunit gamma 3	4.45394	2.89353920575789e-32
LOC108214659	receptor-like protein 12	4.45367	7.6866072526562e-08
LOC108219822	histone acetyltransferase KAT6B-like	4.44901	7.6866072526562e-08
LOC108221638	proline-rich receptor-like protein kinase PERK2	4.44633	7.6866072526562e-08
LOC108210095	potassium channel AKT2/3	4.44241	1.03921150867503e-14
LOC108196498	uncharacterized protein LOC108196498	4.43441	1.03921150867503e-14
LOC108226624	MADS-box transcription factor 6-like	4.43352	0.00223540781973374
LOC108200070	uncharacterized protein LOC108200070	4.43163	0.00223540781973374
LOC108213297	salutaridinol 7-O-acetyltransferase-like	4.4296	5.02236431056906e-11
LOC108224848	putative lipid phosphate phosphatase 3, chloroplastic	4.42932	2.47163491940824e-05
LOC108212819	F-box protein At2g27310-like	4.42486	1.47524770358948e-07
LOC108205283	leucine-rich repeat receptor-like serine/threonine-protein kinase BAM3	4.4238	3.00270575524087e-11
LOC108215448	adenylate isopentenyltransferase 3, chloroplastic-like	4.42297	0.000412833059146761
LOC108227092	probable LRR receptor-like serine/threonine-protein kinase At2g16250	4.4064	0.000412833059146761
LOC108197299	transcriptional corepressor SEUSS-like	4.40628	0.000412833059146761
LOC108215754	teosinte glume architecture 1-like	4.40407	0.000412833059146761
LOC108204336	protein ABSCISIC ACID-INSENSITIVE 5-like	4.39809	3.67577305406415e-05
LOC108218718	probable sucrose-phosphate synthase 4	4.39764	0.00124922834276647
LOC108219470	ABC transporter B family member 1-like	4.39532	0.00124922834276647
LOC108226847	uncharacterized protein LOC108226847	4.38549	0.000724238181837095
LOC108196432	transcription initiation factor TFIID subunit 9-like	4.38301	0.00675635123840076
LOC108217342	LOW QUALITY PROTEIN: putative protein TPRXL, partial	4.38131	0.00675635123840076
LOC108225265	transcription factor bHLH79-like	4.37286	0.00675635123840076
LOC108206022	protein NRT1/ PTR FAMILY 7.3-like	4.37262	0.00675635123840076
LOC108207476	uncharacterized protein LOC108207476	4.36432	0.0036295604164625
LOC108223023	uncharacterized protein LOC108223023	4.36208	1.42813942900065e-08
LOC108214633	mechanosensitive ion channel protein 6-like	4.36194	0.000339390692129102
LOC108212861	uncharacterized protein LOC108212861	4.35935	0.000339390692129102
LOC108197796	uncharacterized protein LOC108197796	4.35596	0.00586396485899283
LOC108222780	probable glycosyltransferase At5g20260	4.35523	1.79141708468978e-14
LOC108215241	uncharacterized protein LOC108215241	4.34994	0.00137032388429539
LOC108213778	LOW QUALITY PROTEIN: dihydroneopterin aldolase 2-like	4.34981	8.79827325699596e-11
LOC108207724	ABC transporter G family member 36-like	4.34371	0.00928479066489608
LOC108205114	branched-chain-amino-acid aminotransferase-like protein 2	4.34244	0.00928479066489608
LOC108213754	peroxidase 5-like	4.34188	1.43672612643501e-24
LOC108196033	uncharacterized protein LOC108196033	4.33856	7.44464157440244e-08
LOC108216500	glycolipid transfer protein 2	4.33777	6.73463966571236e-10
LOC108211719	floral homeotic protein DEFICIENS-like	4.33528	3.68789712529271e-05
LOC108225358	protein WVD2-like 7	4.33286	3.68789712529271e-05
LOC108220631	GATA transcription factor 2-like	4.33194	3.68789712529271e-05
LOC108220761	GATA transcription factor 2-like	4.33194	3.68789712529271e-05
LOC108202283	basic leucine zipper 43-like	4.32426	3.68789712529271e-05
LOC108195163	uncharacterized protein LOC108195163	4.32078	3.68789712529271e-05
LOC108212261	protein NRT1/ PTR FAMILY 8.4-like	4.3068	1.76182593129152e-61
LOC108218665	uncharacterized protein LOC108218665	4.30577	9.34707886925275e-08
LOC108208022	uncharacterized protein LOC108208022	4.30212	3.03314042116101e-98
LOC108215238	probable beta-D-xylosidase 2	4.29921	1.75021340802829e-15
LOC108219452	transcription factor BEE 3-like	4.29816	5.20269675900258e-05
LOC108206629	protein LURP-one-related 4-like	4.29736	1.37829903592534e-14
LOC108220920	transcription factor bHLH35-like	4.29056	1.37829903592534e-14
LOC108212479	ethylene-responsive transcription factor ERF071-like	4.28489	7.15989491611732e-19
LOC108224754	uncharacterized protein LOC108224754	4.28407	7.09531884693577e-07
LOC108206792	fibrous sheath CABYR-binding protein-like	4.28309	0.000949449849737836
LOC108225002	protein trichome birefringence-like	4.28007	0.000949449849737836
LOC108211997	transcription repressor OFP6-like	4.27614	3.8949894475443e-10
LOC108196384	reticulon-like protein B13	4.27592	9.01433196630948e-19
LOC108214223	beta-glucosidase BoGH3B-like	4.27213	1.85801224049904e-18
LOC108207415	F-box/kelch-repeat protein At3g23880-like, partial	4.2709	0.000211914023618107
LOC108199709	uncharacterized protein LOC108199709	4.26833	0.000211914023618107
LOC108198794	DNA (cytosine-5)-methyltransferase DRM2-like	4.26634	4.07539642896231e-09
LOC108217838	probable E3 ubiquitin-protein ligase XERICO	4.2651	1.07273663377667e-06
LOC108208170	keratin, type I cytoskeletal 10-like	4.26159	1.07273663377667e-06
LOC108193781	tryptophan aminotransferase-related protein 2	4.26061	0.000133163064576052
LOC108225634	cytochrome P450 76AD1-like	4.25648	9.0303976576358e-60
LOC108194001	transcription factor PIF7-like	4.25452	6.52134318230511e-10
LOC108202501	uncharacterized protein LOC108202501	4.25376	2.20824829914083e-09
LOC108215571	protein EXORDIUM	4.24811	5.15103106777977e-19
LOC108209258	probable phospholipid-transporting ATPase 4	4.24655	5.91037568894406e-06
LOC108202537	deoxynucleoside triphosphate triphosphohydrolase SAMHD1 homolog	4.24594	2.03156777004329e-10
LOC108215990	uncharacterized protein LOC108215990	4.24083	0.00107183916372222
LOC108227525	nucleobase-ascorbate transporter 3-like	4.2406	0.00107183916372222
LOC108205416	uncharacterized protein LOC108205416	4.23944	0.00107183916372222
LOC108195395	uncharacterized protein LOC108195395	4.23652	8.81511537031484e-06
LOC108192967	uncharacterized protein LOC108192967	4.22612	7.98226406920014e-05
LOC108215042	RAB6-interacting golgin-like	4.22058	0.00882717433362377
LOC108202926	probable receptor-like serine/threonine-protein kinase At5g57670	4.21569	0.00882717433362377
LOC108207606	uncharacterized protein LOC108207606	4.21192	7.73654220910109e-24
LOC108205187	probable LRR receptor-like serine/threonine-protein kinase At3g47570	4.20665	1.52044865250693e-19
LOC108198666	delta-1-pyrroline-5-carboxylate synthase-like	4.20577	1.52044865250693e-19
LOC108217531	uncharacterized protein LOC108217531	4.1945	1.52044865250693e-19
LOC108196280	putative glucose-6-phosphate 1-epimerase	4.19088	1.52044865250693e-19
LOC108217318	RNA-binding KH domain-containing protein PEPPER-like	4.18797	1.52044865250693e-19
LOC108220830	auxin-induced protein IAA6-like	4.18586	1.52044865250693e-19
LOC108216362	fasciclin-like arabinogalactan protein 9	4.18489	8.52590172510594e-19
LOC108214123	probable nucleoredoxin 2	4.18206	1.47759256936442e-08
LOC108216783	protein DETOXIFICATION 48-like	4.18137	3.6793772779399e-10
LOC108200507	LOW QUALITY PROTEIN: uncharacterized N-acetyltransferase p20-like	4.17981	3.6903848783174e-06
LOC108210685	receptor-like serine/threonine-protein kinase SD1-8	4.17258	0.00676635205814416
LOC108218169	cytochrome P450 76A1-like	4.17206	0.00254048547879259
LOC108204593	uncharacterized protein LOC108204593	4.16837	0.00254048547879259
LOC108198744	uncharacterized protein LOC108198744	4.16722	2.24207647455849e-06
LOC108220979	dynein light chain LC6, flagellar outer arm	4.16557	2.24207647455849e-06
LOC108217396	uncharacterized protein LOC108217396	4.16468	3.43715447179299e-31
LOC108207994	protein ABHD17B-like	4.16038	3.6903848783174e-06
LOC108193210	phosphoinositide phospholipase C 2-like	4.16024	0.000179815864466982
LOC108205016	low affinity sulfate transporter 3-like	4.15888	1.32885239907114e-16
LOC108223528	fatty-acid-binding protein 3, chloroplastic	4.15851	1.32885239907114e-16
LOC108225315	uncharacterized protein LOC108225315	4.15794	7.9706354311601e-30
LOC108205584	pentatricopeptide repeat-containing protein At4g01400, mitochondrial-like	4.15621	2.84218341959579e-45
LOC108205642	esterase AGAP003155-like	4.15496	6.88139543661336e-21
LOC108212168	chaperone protein dnaJ 11, chloroplastic-like	4.15485	5.53629437687725e-05
LOC108223639	cellulose synthase-like protein D5	4.15041	0.00458556242516679
LOC108203083	3-ketoacyl-CoA synthase 11	4.14593	0.00458556242516679
LOC108228003	uncharacterized protein LOC108228003	4.14511	1.34384826132207e-10
LOC108224946	uncharacterized protein LOC108224946	4.14509	9.70577227621975e-06
LOC108216708	photosystem II 10 kDa polypeptide, chloroplastic	4.14389	0.000210745692253188
LOC108206503	phospholipase A1-Ibeta2, chloroplastic-like	4.14225	7.26526249424581e-06
LOC108206824	histone H4	4.1396	1.77385269775789e-12
LOC108209171	ankyrin repeat-containing protein At5g02620-like	4.13803	7.42308053038759e-06
LOC108196961	probable zinc transporter 10	4.13449	7.42308053038759e-06
LOC108227497	two pore calcium channel protein 1A-like	4.13268	7.42308053038759e-06
LOC108213836	zinc finger protein ZAT4	4.1311	7.42308053038759e-06
LOC108199137	ethylene-responsive transcription factor ERF022-like	4.13019	7.42308053038759e-06
LOC108199268	ethylene-responsive transcription factor ERF022-like	4.13019	7.42308053038759e-06
LOC108213284	uncharacterized protein LOC108213284	4.12569	7.42308053038759e-06
LOC108211650	uncharacterized protein At5g05190-like	4.12513	7.42308053038759e-06
LOC108205263	peptidyl-prolyl cis-trans isomerase FKBP17-1, chloroplastic	4.12397	7.51334100581328e-07
LOC108206484	basic leucine zipper 43	4.11755	0.000505866380345517
LOC108213130	inositol hexakisphosphate and diphosphoinositol-pentakisphosphate kinase 1-like	4.11188	0.000505866380345517
LOC108213572	monothiol glutaredoxin-S1-like	4.11136	0.000505866380345517
LOC108223362	uncharacterized protein LOC108223362	4.10961	1.29125548592555e-05
LOC108222080	uncharacterized protein LOC108222080	4.10711	7.31490819867902e-23
LOC108210857	flap endonuclease GEN-like 2	4.10648	5.04847243022714e-22
LOC108197572	uncharacterized protein LOC108197572	4.10202	2.51940287286316e-23
LOC108199840	uncharacterized protein LOC108199840	4.10201	6.608308165858e-07
LOC108218762	uncharacterized protein LOC108218762	4.09929	0.0039863054786006
LOC108197558	phosphoinositide phospholipase C 2-like	4.0954	2.44214681944048e-22
LOC108201764	protein NSP-INTERACTING KINASE 3-like	4.09532	2.29275065276692e-33
LOC108207010	F-box protein PP2-A12	4.09442	2.85501397249363e-27
LOC108206560	uncharacterized protein LOC108206560	4.09182	7.06278541973717e-17
LOC108209317	uncharacterized protein LOC108209317	4.08877	0.000145342019626078
LOC108211848	cytochrome b561 domain-containing protein At4g18260-like	4.08828	6.88938893545541e-08
LOC108210423	type I inositol polyphosphate 5-phosphatase 4	4.08784	0.00190237459049869
LOC108198353	probable inactive receptor kinase RLK902	4.08656	2.17623779058664e-09
LOC108198356	probable inactive receptor kinase RLK902	4.08656	0.00599588789609476
LOC108208609	probable carboxylesterase 15	4.0846	0.00599588789609476
LOC108227486	uncharacterized protein LOC108227486	4.08278	0.00599588789609476
LOC108211356	glucan endo-1,3-beta-glucosidase 8-like	4.078	0.00599588789609476
LOC108200182	uncharacterized protein LOC108200182	4.07164	0.00599588789609476
LOC108224255	AP2-like ethylene-responsive transcription factor ANT	4.06579	0.00599588789609476
LOC108222299	uncharacterized protein LOC108222299	4.0657	0.00883454911033264
LOC108211951	protein POLLENLESS 3-LIKE 2-like	4.06547	0.000102698658339693
LOC108208342	uncharacterized protein LOC108208342	4.06451	3.54935613718477e-07
LOC108217554	uncharacterized protein LOC108217554, partial	4.06182	2.0951556960681e-05
LOC108215691	serine/threonine-protein kinase-like protein CCR4	4.06143	9.63930787844432e-13
LOC108213864	transcription factor bHLH18-like	4.05904	9.63930787844432e-13
LOC108213627	cytochrome P450 CYP82D47-like	4.05836	3.48532618155931e-20
LOC108198620	OTU domain-containing protein At3g57810-like	4.05572	0.00428683966940799
LOC108199980	chloride channel protein CLC-e	4.05568	0.000358391948463421
LOC108216236	probable glycosyltransferase At5g03795	4.05552	0.000358391948463421
LOC108214649	auxin-induced protein 22D-like	4.05085	0.000358391948463421
LOC108214243	protein MIZU-KUSSEI 1-like	4.04032	1.25147367442731e-14
LOC108198729	transcription factor MYB3-like	4.04017	7.26851878360553e-09
LOC108208595	protein BTR1-like	4.03582	0.00326294067398363
LOC108193528	lipase-like	4.0303	4.65885939298092e-09
LOC108197648	ferric reduction oxidase 7, chloroplastic-like	4.02578	3.81095860115057e-24
LOC108193865	5\\'-nucleotidase SurE-like	4.01981	9.9165224508686e-08
LOC108199289	probable pectinesterase 68	4.00798	9.9165224508686e-08
LOC108196923	phosphate transporter PHO1	4.00713	9.9165224508686e-08
LOC108220326	lysosomal Pro-X carboxypeptidase	4.00322	2.80559186634459e-17
LOC108205179	ABC transporter G family member 25	4.00044	7.09930843878293e-07
LOC108200512	protein SHOOT GRAVITROPISM 5-like	3.99722	4.05495735405498e-08
LOC108211667	protein POLLENLESS 3-LIKE 2-like	3.99711	4.05495735405498e-08
LOC108193957	dof zinc finger protein DOF3.4-like	3.98579	4.05495735405498e-08
LOC108218212	mitochondrial inner membrane protease subunit 2-like	3.98533	4.05495735405498e-08
LOC108214192	aluminum-activated malate transporter 9-like	3.98451	4.05495735405498e-08
LOC108193634	homeobox-leucine zipper protein ATHB-40	3.97256	4.05495735405498e-08
LOC108220720	SPX domain-containing protein 1	3.97181	0.00361061155916656
LOC108199761	lysine-specific demethylase JMJ25-like	3.96784	0.000904611560145011
LOC108211300	cytokinin dehydrogenase 1-like	3.96192	6.26801402412831e-12
LOC108222490	uncharacterized protein LOC108222490	3.9567	2.615304969259e-06
LOC108222122	probable pectinesterase 53	3.95341	4.46709949345159e-09
LOC108219527	uncharacterized protein LOC108219527	3.95275	4.57707518449532e-08
LOC108213718	ethylene-responsive transcription factor ERF017-like	3.94427	4.57707518449532e-08
LOC108206351	uncharacterized protein LOC108206351	3.94419	4.57707518449532e-08
LOC108194148	uncharacterized protein LOC108194148	3.94414	4.57707518449532e-08
LOC108218321	cytochrome P450 CYP72A219-like	3.9429	4.57707518449532e-08
LOC108196752	floral homeotic protein APETALA 2-like	3.94205	3.47913916240515e-10
LOC108207536	uncharacterized protein LOC108207536	3.94082	7.35769603332238e-06
LOC108227409	kinesin-like protein KIN-7K, chloroplastic	3.93948	7.35769603332238e-06
LOC108216779	65-kDa microtubule-associated protein 3-like	3.93578	1.37211203193877e-05
LOC108209914	asparagine synthetase	3.93499	2.13407575988725e-07
LOC108200198	benzyl alcohol O-benzoyltransferase-like	3.93492	2.13407575988725e-07
LOC108209680	ABC transporter G family member 24-like	3.93464	3.77412217774858e-40
LOC108210653	auxin-responsive protein IAA16-like	3.93409	3.77412217774858e-40
LOC108218319	kinesin KP1-like	3.93161	0.00523605281617845
LOC108222918	deSI-like protein At4g17486	3.9312	0.00523605281617845
LOC108223384	isoamylase 3, chloroplastic	3.92918	0.00523605281617845
LOC108200841	thylakoid lumenal 19 kDa protein, chloroplastic-like	3.92358	0.00523605281617845
LOC108206698	vesicle transport protein GOT1B-like	3.91881	2.29484745799668e-142
LOC108219298	subtilisin-like protease SBT4.10	3.91771	6.73391595321951e-49
LOC108223545	leucine-rich repeat receptor-like protein kinase TDR	3.9176	0.000417089710943272
LOC108199729	serine/threonine-protein kinase STN8, chloroplastic	3.91523	4.19987877230798e-19
LOC108223112	formin-like protein 17	3.90732	1.11088906058969e-07
LOC108200894	glycine-rich cell wall structural protein-like	3.90641	1.11088906058969e-07
LOC108200646	sesquiterpene synthase 2-like	3.90588	2.10920992291299e-33
LOC108195081	uncharacterized protein LOC108195081	3.90344	1.89172446895225e-22
LOC108207762	uncharacterized protein LOC108207762	3.90328	0.000922528135188256
LOC108195542	WAT1-related protein At5g40240-like	3.90307	0.000922528135188256
LOC108221446	uncharacterized protein LOC108221446	3.89862	0.000922528135188256
LOC108193639	defensin-like protein 1	3.8964	0.000922528135188256
LOC108196312	uncharacterized protein LOC108196312	3.89638	0.000922528135188256
LOC108227485	lipase member N-like	3.89413	0.000922528135188256
LOC108210750	disease resistance protein At4g27190-like	3.89375	0.000922528135188256
LOC108227004	UDP-glycosyltransferase 83A1-like	3.89251	0.000922528135188256
LOC108227825	peroxidase 57	3.89207	0.000922528135188256
LOC108215207	blue copper protein-like	3.8908	1.75540969062953e-24
LOC108220779	uncharacterized protein LOC108220779	3.89019	8.31177719291342e-06
LOC108193534	uncharacterized protein LOC108193534	3.88634	8.31177719291342e-06
LOC108195013	uncharacterized protein LOC108195013	3.88436	0.00435260261108738
LOC108216671	uncharacterized protein LOC108216671	3.88182	0.00435260261108738
LOC108196818	protein transport protein SEC16B homolog	3.87655	0.00435260261108738
LOC108217080	uncharacterized protein LOC108217080	3.8723	5.023697360893e-16
LOC108196208	exopolygalacturonase-like	3.87067	1.25046161482894e-54
LOC108217677	rac-like GTP-binding protein RAC2	3.86842	4.78004102501277e-25
LOC108195171	protein MKS1-like	3.86808	4.70940802652261e-11
LOC108224871	uncharacterized protein LOC108224871	3.86728	3.6873608498072e-10
LOC108193336	L-ascorbate oxidase homolog	3.86722	2.67788418607894e-06
LOC108210657	(-)-germacrene D synthase-like	3.86518	2.67788418607894e-06
LOC108220389	ABC transporter G family member 11-like	3.86056	1.21732434122349e-07
LOC108217341	uncharacterized protein LOC108217341	3.85915	1.21732434122349e-07
LOC108220364	peroxidase 3-like	3.85743	1.10391421678729e-15
LOC108202782	sesquiterpene synthase 2-like	3.85685	0.000607772022685847
LOC108227629	subtilisin-like protease SBT1.5	3.85569	0.000607772022685847
LOC108210874	transcription factor DIVARICATA	3.85507	2.48931620165696e-08
LOC108199446	WEB family protein At2g38370	3.8484	0.000199411731403027
LOC108218612	probable ubiquitin-like-specific protease 2B	3.84726	6.02384677352625e-11
LOC108194537	uncharacterized protein LOC108194537	3.84635	7.26526249424581e-06
LOC108211663	phosphatidylinositol:ceramide inositolphosphotransferase 2-like	3.84629	7.26526249424581e-06
LOC108221844	uncharacterized protein LOC108221844	3.84337	6.85779306541103e-32
LOC108220217	AUGMIN subunit 8	3.84296	1.21401238021085e-10
LOC108196368	uncharacterized protein LOC108196368	3.84225	7.15713466658839e-05
LOC108216462	protein COFACTOR ASSEMBLY OF COMPLEX C SUBUNIT B CCB1, chloroplastic	3.84111	9.92366074461439e-05
LOC108200855	U-box domain-containing protein 2-like	3.83989	2.34035055835246e-09
LOC108202048	uncharacterized protein LOC108202048	3.83928	0.000151466359096514
LOC108209868	type I inositol polyphosphate 5-phosphatase 2-like	3.83814	0.000140407412239592
LOC108213736	LEAF RUST 10 DISEASE-RESISTANCE LOCUS RECEPTOR-LIKE PROTEIN KINASE-like 1.4	3.83543	0.000140407412239592
LOC108194005	uncharacterized protein LOC108194005	3.83309	0.000140407412239592
LOC108211973	uncharacterized protein At4g22758	3.83051	4.7344443448448e-232
LOC108222119	putative clathrin assembly protein At1g25240	3.83037	4.7344443448448e-232
LOC108200858	homeobox-leucine zipper protein HAT3-like	3.83015	2.18950116004513e-07
LOC108211465	protein CUP-SHAPED COTYLEDON 3-like	3.82952	0.000599568637136055
LOC108224344	tyrosine-specific transport protein-like	3.82614	1.19786007275475e-13
LOC108225487	tyrosine-specific transport protein-like	3.82614	1.93443773495894e-18
LOC108225850	uncharacterized protein LOC108225850	3.82457	1.93443773495894e-18
LOC108217812	eukaryotic translation initiation factor 3 subunit A-like	3.8244	0.000301044090583396
LOC108193752	leucine-rich repeat extensin-like protein 5	3.82222	9.65753550516124e-55
LOC108218602	uncharacterized protein LOC108218602	3.82168	1.49061772639984e-15
LOC108197791	probable magnesium transporter NIPA1	3.8187	0.00276523435764195
LOC108208979	B3 domain-containing protein Os07g0563300-like	3.81683	1.26983211091787e-14
LOC108224461	AP2-like ethylene-responsive transcription factor ANT	3.81315	1.26983211091787e-14
LOC108206873	protein IQ-DOMAIN 1-like	3.81166	9.69041238946522e-13
LOC108210201	kinesin-like protein KIN-7K, chloroplastic	3.81091	9.69041238946522e-13
LOC108211369	uncharacterized protein LOC108211369	3.80529	2.69804732228859e-26
LOC108210999	aspartic proteinase nepenthesin-1-like	3.80071	5.5160394404687e-13
LOC108206062	cysteine-rich repeat secretory protein 12-like	3.79915	6.22826734599122e-07
LOC108214957	LOB domain-containing protein 21-like	3.79794	5.64081491984213e-31
LOC108204499	fructose-bisphosphate aldolase 1, chloroplastic	3.78762	0.00388283991575295
LOC108200721	uncharacterized protein LOC108200721	3.78639	1.17151783981269e-11
LOC108226614	geraniol 8-hydroxylase-like	3.78238	2.35553780507277e-11
LOC108222175	26.5 kDa heat shock protein, mitochondrial	3.7794	0.000958360656961084
LOC108210949	probable pectate lyase 8	3.77898	6.28920535475806e-15
LOC108197167	aldehyde oxidase GLOX	3.77872	0.00198266310713266
LOC108217624	uncharacterized protein At4g38062	3.7697	0.00198266310713266
LOC108200564	probable 6-phosphogluconolactonase 1	3.76723	6.52058662469575e-41
LOC108196501	CSC1-like protein At1g32090	3.76577	0.00696003057500459
LOC108211930	7-deoxyloganetic acid glucosyltransferase-like	3.76472	0.00696003057500459
LOC108219342	reticulon-like protein B21	3.76388	0.00696003057500459
LOC108217615	xyloglucan endotransglucosylase/hydrolase 2-like	3.76306	0.00696003057500459
LOC108200710	uncharacterized protein LOC108200710	3.76161	0.00696003057500459
LOC108202683	phototropin-2	3.76026	1.14013490598955e-22
LOC108223024	piezo-type mechanosensitive ion channel homolog	3.75897	1.31771386874747e-09
LOC108218062	uncharacterized protein LOC108218062	3.75861	2.87823843241371e-05
LOC108209539	common plant regulatory factor 1	3.75816	1.6090179536637e-11
LOC108222208	heme oxygenase 1, chloroplastic-like	3.75469	3.81850584697192e-11
LOC108204899	U-box domain-containing protein 9	3.75463	3.81850584697192e-11
LOC108220099	uncharacterized protein LOC108220099	3.754	5.6164027287367e-05
LOC108195307	uncharacterized protein LOC108195307	3.75374	0.00357367435445106
LOC108224070	uncharacterized protein LOC108224070	3.75338	0.00357367435445106
LOC108193360	adenine phosphoribosyltransferase 5-like	3.74868	0.000565034284347783
LOC108217711	protein trichome birefringence-like	3.74794	0.00735120186865664
LOC108206406	late embryogenesis abundant protein 47-like	3.74537	9.14665023570512e-09
LOC108211091	protein PHLOEM PROTEIN 2-LIKE A1-like	3.74374	0.00132899556356003
LOC108211042	probable inactive leucine-rich repeat receptor-like protein kinase At3g03770	3.74284	0.00132899556356003
LOC108205601	uncharacterized protein LOC108205601	3.74132	3.35215743596419e-11
LOC108197366	cytochrome P450 CYP736A12-like	3.74117	3.35215743596419e-11
LOC108197224	putative glucuronosyltransferase PGSIP8	3.73678	0.00369364320045501
LOC108210056	protein DETOXIFICATION 49-like	3.7352	1.92464373707991e-06
LOC108216374	butyrate--CoA ligase AAE11, peroxisomal-like	3.7308	0.00352729970778396
LOC108218464	protein WALLS ARE THIN 1-like	3.72768	8.70457540397963e-07
LOC108220862	cytochrome P450 734A1-like	3.72681	8.70457540397963e-07
LOC108192790	vacuolar protein 8	3.72539	3.5086564816793e-28
LOC108211538	stress enhanced protein 2, chloroplastic	3.7252	1.44708484601811e-27
LOC108217699	uncharacterized protein LOC108217699	3.72482	1.00462714535023e-05
LOC108225539	heat stress transcription factor B-4-like	3.71951	1.00462714535023e-05
LOC108196444	protein argonaute 10-like	3.7194	1.04536657957667e-70
LOC108224904	uncharacterized protein LOC108224904	3.71869	5.32648256442846e-07
LOC108222440	transcription factor MYB80-like	3.71856	1.98996571346199e-20
LOC108215256	8-hydroxygeraniol dehydrogenase-like	3.71767	1.3542978898246e-05
LOC108220104	uncharacterized protein LOC108220104	3.71617	1.3542978898246e-05
LOC108228093	uncharacterized protein LOC108228093	3.70991	9.16089530761568e-08
LOC108208016	probably inactive leucine-rich repeat receptor-like protein kinase At3g28040	3.70954	0.00368163722662289
LOC108195162	uncharacterized protein LOC108195162	3.70876	3.26523113937538e-19
LOC108212093	1,4-alpha-glucan-branching enzyme 2-2, chloroplastic/amyloplastic	3.7086	3.26523113937538e-19
LOC108192880	uncharacterized protein LOC108192880	3.70778	4.80686474818493e-16
LOC108225821	sugar transporter ERD6-like 16	3.70442	0.000332259683715886
LOC108199683	electron transfer flavoprotein-ubiquinone oxidoreductase, mitochondrial	3.70236	7.51141092309497e-31
LOC108204025	auxin-induced protein 22D-like	3.70127	6.33165617967869e-78
LOC108222885	uncharacterized protein LOC108222885	3.69711	0.00187529962566582
LOC108192962	probable plastid-lipid-associated protein 4, chloroplastic	3.69191	0.00608133981348188
LOC108207621	uncharacterized protein LOC108207621	3.68964	0.000428629631402102
LOC108208306	ATPase ASNA1 homolog	3.6881	0.000428629631402102
LOC108221572	mitogen-activated protein kinase 15-like	3.6873	4.45833350088512e-05
LOC108197423	uncharacterized protein LOC108197423	3.68628	8.10866777174358e-44
LOC108203547	chlorophyll a-b binding protein CP26, chloroplastic-like	3.68469	2.24614989204106e-13
LOC108195152	ocs element-binding factor 1-like	3.6776	5.24615115043677e-13
LOC108199779	stem-specific protein TSJT1-like	3.67613	2.13485921822836e-29
LOC108206819	(R)-limonene synthase 1-like	3.67385	0.000184102302047173
LOC108214579	metallothionein-like protein type 2	3.6737	0.00592048585831649
LOC108216176	syntaxin-132-like	3.67101	8.85938386768933e-26
LOC108201960	subtilisin-like protease SBT1.6	3.67016	1.89354955728873e-16
LOC108216334	uncharacterized protein LOC108216334	3.66848	1.46626554470963e-11
LOC108208390	CLAVATA3/ESR (CLE)-related protein 25	3.66848	0.000461165795052945
LOC108204542	protein O-glucosyltransferase 1-like	3.66778	4.74092576602837e-06
LOC108193628	ethylene-responsive transcription factor 12	3.66204	4.74092576602837e-06
LOC108211596	GDSL esterase/lipase At5g03610-like	3.66168	9.35615958669078e-10
LOC108221721	probable protein phosphatase 2C 63	3.66124	9.39891643112248e-12
LOC108202976	probable peroxygenase 4	3.65999	0.0076867210232737
LOC108215185	probable beta-D-xylosidase 7	3.65882	2.70170396817734e-06
LOC108219257	tropinone reductase homolog	3.65789	2.70170396817734e-06
LOC108216038	kinase-interacting family protein-like	3.65498	2.65510279036469e-11
LOC108194071	proline-rich protein 36	3.65238	1.59775652547477e-11
LOC108211296	uncharacterized protein LOC108211296	3.6506	1.5486333159163e-06
LOC108214314	uncharacterized protein LOC108214314	3.64432	1.74155324953673e-06
LOC108209519	uncharacterized protein LOC108209519	3.64326	1.74155324953673e-06
LOC108217749	gibberellin-regulated protein 14-like	3.6425	7.4627385573351e-41
LOC108201734	putative F-box protein At3g52320	3.6362	0.00303177270405546
LOC108205645	pollen-specific protein SF21-like	3.6355	1.06794642958774e-05
LOC108206069	uncharacterized protein LOC108206069	3.63391	3.38713138036912e-20
LOC108196210	vam6/Vps39-like protein	3.6326	7.89399970502499e-09
LOC108223343	uncharacterized protein LOC108223343	3.6312	1.1816891231247e-18
LOC108202958	dormancy-associated protein homolog 3	3.6294	2.39004738730884e-19
LOC108202679	dynamin-related protein 4C-like	3.62775	2.39004738730884e-19
LOC108207764	dammarenediol II synthase-like	3.6257	2.39004738730884e-19
LOC108207446	glucan endo-1,3-beta-glucosidase 8-like	3.62418	1.12592874069259e-10
LOC108219060	glucose-1-phosphate adenylyltransferase small subunit, chloroplastic/amyloplastic	3.62088	1.12592874069259e-10
LOC108225572	protein STRUBBELIG-RECEPTOR FAMILY 2	3.61964	1.12592874069259e-10
LOC108197177	VAN3-binding protein-like	3.61776	8.07230248074405e-11
LOC108201599	uncharacterized protein LOC108201599	3.61483	7.56516698942641e-10
LOC108210008	zinc finger CCCH domain-containing protein 66-like	3.61477	1.63625222798205e-78
LOC108211899	sister chromatid cohesion 1 protein 1	3.61462	7.11035174842498e-10
LOC108213307	uncharacterized protein LOC108213307	3.61193	7.11035174842498e-10
LOC108223192	uncharacterized protein LOC108223192	3.6102	0.00065898171460302
LOC108217925	WEB family protein At1g75720	3.60653	0.00065898171460302
LOC108218926	NAC transcription factor 29-like	3.6006	0.00455857005942621
LOC108220097	putative uridine kinase C227.14	3.59499	0.00134577239720705
LOC108216447	uncharacterized protein LOC108216447	3.59239	2.75638592676851e-32
LOC108214758	probable esterase KAI2	3.5889	5.54989763708546e-10
LOC108227288	ABC transporter G family member 22-like	3.58843	4.49783930519283e-25
LOC108200353	uncharacterized protein At3g61260	3.5872	1.87154360724161e-39
LOC108210129	uncharacterized protein LOC108210129	3.58663	5.55912081594873e-06
LOC108210646	tetratricopeptide repeat protein 7A-like	3.58642	8.1279147263313e-09
LOC108196475	putative quinone-oxidoreductase homolog, chloroplastic	3.5825	8.1279147263313e-09
LOC108200376	UDP-glycosyltransferase 83A1-like	3.58093	0.00174726269460677
LOC108224670	uncharacterized protein LOC108224670	3.57788	0.00960066436663259
LOC108212321	glutamate receptor 2.3-like	3.57455	5.55912081594873e-06
LOC108199421	uncharacterized protein LOC108199421	3.569	0.00040932225866675
LOC108224485	REF/SRPP-like protein At3g05500	3.56701	0.00040932225866675
LOC108225406	gibberellin 3-beta-dioxygenase 2-like	3.56663	0.00040932225866675
LOC108210259	chitinase 3	3.56632	0.00040932225866675
LOC108222337	putative amidase C869.01	3.56501	5.39082771845311e-05
LOC108211638	uncharacterized protein LOC108211638	3.56187	0.00723039657893435
LOC108213219	gibberellin-regulated protein 14	3.5606	0.000414916472920933
LOC108224103	fasciclin-like arabinogalactan protein 2	3.55927	2.70796611427062e-13
LOC108196775	uncharacterized protein LOC108196775	3.55796	2.90848807474498e-07
LOC108209420	alpha,alpha-trehalose-phosphate synthase	3.55793	1.28874175946414e-05
LOC108223109	uncharacterized protein LOC108223109	3.55693	3.12250927685273e-08
LOC108211940	uncharacterized protein LOC108211940	3.55556	3.3134948303708e-05
LOC108227912	BTB/POZ domain-containing protein At1g03010	3.55466	3.3134948303708e-05
LOC108215516	probable auxin efflux carrier component 1c	3.54963	1.36259877133531e-08
LOC108227683	uncharacterized protein LOC108227683	3.5494	0.000878262467090107
LOC108196452	diacylglycerol kinase theta-like	3.54441	0.000878262467090107
LOC108227707	plant UBX domain-containing protein 10-like	3.54434	2.35767459724082e-06
LOC108220223	xyloglucan endotransglucosylase/hydrolase protein 9-like	3.5357	0.000364412444269291
LOC108201797	pyruvate kinase isozyme G, chloroplastic-like	3.53557	8.37026790136517e-05
LOC108228182	uncharacterized protein LOC108228182	3.5343	8.37026790136517e-05
LOC108214057	uncharacterized protein LOC108214057	3.53316	2.28592445875701e-13
LOC108227614	cytochrome P450 78A6	3.52388	2.28592445875701e-13
LOC108208941	putative lipase YDR444W	3.52354	1.8360657940212e-06
LOC108217821	uncharacterized protein LOC108217821	3.52343	0.000344193215302006
LOC108224857	protein ABHD4	3.52175	7.85373503078818e-08
LOC108204797	U-box domain-containing protein 28-like	3.5194	2.99387573529176e-27
LOC108208771	serine/threonine-protein phosphatase 6 regulatory ankyrin repeat subunit C-like	3.51897	1.55060727084776e-07
LOC108205328	protein SYM1-like	3.51838	1.55060727084776e-07
LOC108206878	gibberellin 2-beta-dioxygenase 8	3.51594	5.51878381036278e-217
LOC108225762	vesicle-associated protein 1-4-like	3.5136	1.3735069046016e-19
LOC108217633	bZIP transcription factor 27	3.51285	6.19112616060877e-10
LOC108202921	uncharacterized protein LOC108202921	3.50846	3.17688832230836e-11
LOC108208877	uncharacterized protein LOC108208877	3.50729	1.36675397317097e-11
LOC108224603	receptor-like protein kinase 5	3.49943	1.36675397317097e-11
LOC108200998	peroxidase 10-like	3.4979	7.60068731368754e-19
LOC108208277	uncharacterized protein LOC108208277	3.49539	7.60068731368754e-19
LOC108211036	transcription factor PCL1-like	3.49465	1.75205352306322e-11
LOC108197179	induced stolen tip protein TUB8-like	3.49237	8.81642827108201e-20
LOC108219897	uncharacterized protein LOC108219897	3.49162	0.000777030141210607
LOC108218889	calcium-dependent protein kinase 1-like	3.49152	5.58722288416995e-13
LOC108196138	agamous-like MADS-box protein AGL12	3.49056	2.65168983377232e-82
LOC108211069	protein ECERIFERUM 3-like	3.48795	2.74794686657965e-18
LOC108211549	cation/calcium exchanger 4-like	3.48737	5.18668242580737e-27
LOC108212518	ATP-dependent DNA helicase PIF1-like	3.48489	5.0469200632026e-16
LOC108194029	chaperone protein dnaJ 8, chloroplastic	3.48443	6.00852910743115e-35
LOC108207895	uncharacterized protein LOC108207895	3.48264	6.00852910743115e-35
LOC108197294	protein NSP-INTERACTING KINASE 2	3.48126	6.00852910743115e-35
LOC108212061	uncharacterized protein LOC108212061	3.47875	6.00852910743115e-35
LOC108213298	DNA-damage-repair/toleration protein DRT100-like	3.47864	4.98400337654791e-09
LOC108211659	WAT1-related protein At5g64700	3.47844	4.96061180184038e-05
LOC108198156	transcription initiation factor TFIID subunit 4-like	3.4782	5.0848866524702e-07
LOC108195074	LOW QUALITY PROTEIN: protein LIGHT-DEPENDENT SHORT HYPOCOTYLS 4	3.47761	2.59315810776715e-09
LOC108213782	uncharacterized protein LOC108213782	3.47715	6.26923970896587e-10
LOC108220546	3-hexulose-6-phosphate isomerase	3.47617	6.23801199638596e-14
LOC108216824	glucan endo-1,3-beta-glucosidase 12-like	3.4711	7.28879022190004e-11
LOC108197699	myosin-binding protein 2	3.47105	4.79544343480387e-08
LOC108208862	tubulin beta chain-like	3.4695	2.21783397708544e-05
LOC108196551	CASP-like protein 1E2	3.46683	2.21783397708544e-05
LOC108196486	putative cell wall protein	3.46526	0.00851960278492016
LOC108226519	calmodulin-binding protein 25	3.45656	0.00851960278492016
LOC108219851	protein IQ-DOMAIN 14-like	3.45617	0.00851960278492016
LOC108193462	histidine-containing phosphotransfer protein 4	3.45417	0.00249084965440609
LOC108195527	LEAF RUST 10 DISEASE-RESISTANCE LOCUS RECEPTOR-LIKE PROTEIN KINASE-like 2.1	3.45323	0.00249084965440609
LOC108219453	uncharacterized protein LOC108219453	3.4521	0.00249084965440609
LOC108206659	auxin response factor 18-like	3.45204	0.00314521289603722
LOC108222298	probable 2-oxoglutarate-dependent dioxygenase AOP1	3.45089	7.29923609876246e-11
LOC108193133	phragmoplast orienting kinesin-1	3.44891	0.000264274511989309
LOC108215702	keratin, type II cytoskeletal 1-like	3.44608	0.00299427212781544
LOC108213281	dehydration-responsive element-binding protein 1E-like	3.44499	5.87872347719294e-38
LOC108206971	tetraspanin-19-like	3.44352	2.52018493714897e-09
LOC108221802	cysteine-rich receptor-like protein kinase 2	3.44238	0.00487450455335961
LOC108208341	uncharacterized protein LOC108208341	3.44085	0.00166692393816854
LOC108225918	CBL-interacting serine/threonine-protein kinase 4-like	3.44021	7.06970929791774e-09
LOC108222193	gibberellin 3-beta-dioxygenase 1-like	3.43976	7.06970929791774e-09
LOC108211645	LOW QUALITY PROTEIN: zinc-finger homeodomain protein 9	3.43975	5.72981714435459e-10
LOC108225240	uncharacterized protein LOC108225240	3.43749	1.28660078547513e-08
LOC108225230	uncharacterized protein LOC108225230	3.43482	4.69170885593656e-11
LOC108200201	peroxidase 40	3.43433	9.90955084490484e-05
LOC108196856	probable histone-arginine methyltransferase 1.3	3.43409	0.000684969107046257
LOC108195712	uncharacterized protein LOC108195712	3.43311	0.00398252321882359
LOC108200379	QWRF motif-containing protein 2-like	3.43309	1.28345745900286e-07
LOC108210070	protein ASPARTIC PROTEASE IN GUARD CELL 1	3.43024	0.00502012912609828
LOC108199617	uncharacterized protein LOC108199617	3.42987	3.9376952425844e-72
LOC108206034	aspartyl protease family protein At5g10770-like	3.42922	4.74145213985537e-06
LOC108209872	UDP-glucose iridoid glucosyltransferase-like	3.42857	3.6766655521379e-15
LOC108208884	protein trichome birefringence-like 25	3.42786	2.29438767393775e-182
LOC108207932	ABC transporter G family member 31-like	3.42746	5.92918999465733e-11
LOC108226848	uncharacterized protein LOC108226848	3.42648	2.46254620174988e-28
LOC108198439	transcription factor bHLH92-like	3.42576	6.67332514204731e-35
LOC108193769	uncharacterized protein LOC108193769	3.42397	4.00768420947765e-06
LOC108220956	probable 2-oxoglutarate-dependent dioxygenase AOP1	3.42001	4.00768420947765e-06
LOC108224943	L-ascorbate oxidase homolog	3.41891	4.00768420947765e-06
LOC108219074	trihelix transcription factor PTL	3.4184	7.60988455087663e-13
LOC108219853	uncharacterized protein LOC108219853	3.41676	1.32890545008817e-11
LOC108222091	two-component response regulator ARR17-like	3.41649	1.32890545008817e-11
LOC108218858	Niemann-Pick C1 protein-like	3.41436	1.32890545008817e-11
LOC108201035	pectinesterase-like	3.40769	3.72353228119558e-14
LOC108209180	BAG family molecular chaperone regulator 6	3.40679	0.00270089852114486
LOC108213402	late embryogenesis abundant protein D-34-like	3.40588	5.61501043327893e-06
LOC108210489	serine carboxypeptidase-like 25	3.40576	2.91449889940279e-18
LOC108223606	probable LRR receptor-like serine/threonine-protein kinase At4g26540	3.40573	9.83406473228075e-48
LOC108211352	acyl-protein thioesterase 2-like	3.40539	9.83406473228075e-48
LOC108205616	metallothionein-like protein type 2	3.40438	2.35468959802058e-06
LOC108223882	methyl-CpG-binding domain-containing protein 7-like	3.40401	0.000627942122199892
LOC108211642	myb family transcription factor APL-like	3.40296	7.45840935705751e-34
LOC108216417	lysosomal Pro-X carboxypeptidase-like	3.40285	5.33010816499329e-10
LOC108197843	uncharacterized protein LOC108197843	3.40244	0.000148956711820538
LOC108213968	putative disease resistance RPP13-like protein 3	3.40064	5.88885965586468e-25
LOC108217778	uncharacterized protein LOC108217778	3.40023	4.70058751554396e-05
LOC108212303	putative disease resistance RPP13-like protein 3	3.39568	4.70058751554396e-05
LOC108200931	cellulose synthase-like protein D1	3.38838	0.000874035609019441
LOC108201970	uncharacterized protein LOC108201970	3.38754	0.00707939123737332
LOC108220606	polygalacturonase 1 beta-like protein 3	3.3851	6.18731751571264e-108
LOC108209470	jacalin-related lectin 19	3.38394	2.41639062068073e-17
LOC108193034	root phototropism protein 3-like	3.38317	0.00380050447298382
LOC108218051	magnesium-chelatase subunit ChlH, chloroplastic	3.38298	0.00380050447298382
LOC108220629	E3 ubiquitin-protein ligase ATL23	3.38275	0.000351223901430862
LOC108224494	probably inactive leucine-rich repeat receptor-like protein kinase At5g06940	3.38262	8.48125152532461e-08
LOC108206311	BTB/POZ domain-containing protein At1g30440-like	3.38226	0.00440079910185621
LOC108196181	probable calcium-binding protein CML22	3.37986	1.67313365489689e-103
LOC108206280	uncharacterized protein LOC108206280	3.37954	6.13974832366413e-135
LOC108194102	cytochrome P450 94B3-like	3.37952	1.3727478636551e-05
LOC108196650	oxygen-evolving enhancer protein 1, chloroplastic-like	3.37858	1.3727478636551e-05
LOC108200287	uncharacterized protein LOC108200287	3.37729	1.3727478636551e-05
LOC108205204	uncharacterized protein LOC108205204	3.37618	0.0026125387424641
LOC108194231	kelch-like protein 2	3.37521	1.10117100525919e-33
LOC108221109	uncharacterized protein LOC108221109	3.37389	6.00204137751437e-09
LOC108200885	uncharacterized protein LOC108200885	3.37044	0.000161776272621784
LOC108194451	monocopper oxidase-like protein SKU5	3.37009	0.000161776272621784
LOC108214828	beta-carotene 3-hydroxylase, chloroplastic-like	3.36902	0.000350419256596452
LOC108219337	chaperone protein dnaJ 10-like	3.36668	1.34608188252705e-05
LOC108196508	probable glycosyltransferase At5g25310	3.36637	5.45887848177084e-11
LOC108197357	probable LRR receptor-like serine/threonine-protein kinase IRK	3.3659	1.39158426444522e-16
LOC108213017	titin-like	3.3646	1.98466805599163e-10
LOC108218160	uncharacterized protein LOC108218160	3.36311	3.95790394966195e-09
LOC108202532	glucose-1-phosphate adenylyltransferase large subunit 1-like	3.36309	1.05234609405662e-31
LOC108216165	actin-depolymerizing factor 1	3.36167	2.41042329836069e-28
LOC108197092	BTB/POZ domain-containing protein At1g67900	3.36131	7.58870809932476e-09
LOC108208172	glutaredoxin-C10-like	3.36048	7.58870809932476e-09
LOC108201303	endoribonuclease Dicer homolog 2-like	3.3568	7.58870809932476e-09
LOC108220166	LRR receptor-like serine/threonine-protein kinase ERL1	3.35267	7.58870809932476e-09
LOC108210415	probable serine/threonine-protein kinase At1g54610	3.35038	3.69834523266173e-08
LOC108196013	leucine-rich repeat receptor-like serine/threonine-protein kinase BAM1	3.34984	3.69834523266173e-08
LOC108209529	acid beta-fructofuranosidase-like	3.3489	3.69834523266173e-08
LOC108208942	cytosolic sulfotransferase 6-like	3.34884	3.69834523266173e-08
LOC108219250	probable xyloglucan glycosyltransferase 12	3.34814	0.00512748739664421
LOC108201325	endoribonuclease Dicer homolog 2-like	3.34377	0.00512748739664421
LOC108193863	peroxidase 10-like	3.34352	0.00536745333548126
LOC108224237	protein TPX1	3.34245	9.2129509472682e-30
LOC108226237	protein MARD1-like	3.34118	2.18488292287015e-09
LOC108213175	probable histone H2AXa	3.33853	1.1968837257299e-24
LOC108217879	uncharacterized protein LOC108217879	3.33574	0.00196889932837147
LOC108216661	rRNA-processing protein EBP2-like	3.33339	0.000245898040704814
LOC108193236	BTB/POZ domain-containing protein At1g67900-like	3.3332	6.56617923890885e-135
LOC108200883	probable WRKY transcription factor 48	3.3323	0.00310080538818475
LOC108208413	protein NDR1-like	3.33111	0.00774506334549283
LOC108210580	BTB/POZ domain-containing protein At1g03010-like	3.33004	7.13974377353013e-127
LOC108211589	uncharacterized protein At5g48480-like	3.32862	5.6132468477233e-28
LOC108211116	protein LONGIFOLIA 1	3.32818	5.6132468477233e-28
LOC108219680	fimbrin-2-like	3.32687	5.6132468477233e-28
LOC108216333	G-type lectin S-receptor-like serine/threonine-protein kinase At5g35370	3.32352	5.98591153794118e-09
LOC108213311	uncharacterized protein LOC108213311	3.32297	5.1874583502229e-30
LOC108211836	protein IQ-DOMAIN 1-like	3.32264	8.0046869172826e-14
LOC108205667	uncharacterized protein LOC108205667	3.32241	5.52673452358042e-07
LOC108224884	vesicle-associated protein 2-2-like	3.3181	2.15409101600133e-05
LOC108225404	F-box/kelch-repeat protein At3g27150	3.3148	5.5581994915848e-11
LOC108202046	uncharacterized protein LOC108202046	3.30991	5.5581994915848e-11
LOC108211066	LOW QUALITY PROTEIN: probable tRNA (guanine(26)-N(2))-dimethyltransferase 2	3.30896	5.5581994915848e-11
LOC108210498	stress response protein NST1	3.30836	5.5581994915848e-11
LOC108210386	putative quinone-oxidoreductase homolog, chloroplastic	3.30833	3.69420819653265e-14
LOC108226577	uncharacterized protein LOC108226577	3.30578	0.000139181734746786
LOC108217413	glucose-1-phosphate adenylyltransferase small subunit, chloroplastic/amyloplastic-like	3.30436	0.000139181734746786
LOC108197526	dof zinc finger protein DOF1.4-like	3.3029	0.000139181734746786
LOC108196730	BTB/POZ domain-containing protein At5g67385-like	3.3017	0.000139181734746786
LOC108194481	tyrosine-specific transport protein 2-like	3.30162	0.000139181734746786
LOC108199270	homeobox-leucine zipper protein HOX10-like	3.29709	0.000139181734746786
LOC108210967	protein NRT1/ PTR FAMILY 6.2-like	3.29648	0.000139181734746786
LOC108219919	uncharacterized protein LOC108219919	3.29615	0.00254221048336243
LOC108193266	serine/threonine-protein kinase BRI1-like 2	3.29434	4.44692782398655e-16
LOC108220502	protein ABA DEFICIENT 4, chloroplastic-like	3.29294	5.69708587535846e-08
LOC108217612	heat stress transcription factor A-4b-like	3.29243	1.01143737218085e-06
LOC108193198	uncharacterized protein LOC108193198	3.29158	3.12665773653944e-07
LOC108196474	ethylene-responsive transcription factor ERF017	3.29029	2.28637219445348e-36
LOC108211652	probable chlorophyll(ide) b reductase NYC1, chloroplastic	3.28847	2.28637219445348e-36
LOC108205285	oxygen-evolving enhancer protein 3-2, chloroplastic-like	3.28793	7.7132349987314e-58
LOC108210734	uncharacterized protein At4g08330, chloroplastic-like	3.28612	7.7132349987314e-58
LOC108199873	choline/ethanolaminephosphotransferase 1	3.28553	0.00243174248849135
LOC108205027	PI-PLC X domain-containing protein At5g67130-like	3.28528	0.00243174248849135
LOC108220880	uncharacterized protein LOC108220880	3.28366	6.76500580516558e-08
LOC108194193	transcription repressor MYB6-like	3.28292	2.76929795644319e-14
LOC108209942	putative pterin-4-alpha-carbinolamine dehydratase	3.28033	2.76929795644319e-14
LOC108194368	glutaredoxin-C13	3.27984	4.52285940481895e-10
LOC108211945	geraniol 8-hydroxylase-like	3.27888	0.000749462799749287
LOC108205892	protein E6-like	3.27632	3.03031053438437e-05
LOC108207964	uncharacterized protein LOC108207964	3.27502	0.00541906365280286
LOC108218045	cyclin-dependent protein kinase inhibitor SMR2	3.27448	7.26085559203521e-139
LOC108208540	ethylene-responsive transcription factor ERF106-like	3.27327	0.00971106131794567
LOC108215160	tyrosine-sulfated glycopeptide receptor 1-like	3.27199	1.17967310655157e-24
LOC108200684	myrcene synthase, chloroplastic-like	3.2715	0.00631820823146927
LOC108213403	myb-related protein 305-like	3.27101	1.11666664473384e-22
LOC108201037	keratin, type I cytoskeletal 9-like	3.27057	1.82538022812609e-58
LOC108202696	phytochrome A	3.26812	1.34818779413318e-128
LOC108206960	transcription factor MYC2-like	3.26809	3.9460624790935e-16
LOC108200610	GDP-mannose transporter GONST1	3.26715	3.62725571728668e-06
LOC108199499	phospholipid-transporting ATPase 3-like	3.266	0.000116535469420351
LOC108227915	K(+) efflux antiporter 3, chloroplastic	3.26342	0.00613110251409043
LOC108226661	legumin B-like	3.26266	8.43518039687468e-05
LOC108222121	tyrosine-specific transport protein-like	3.26214	0.000603590477507548
LOC108215750	carboxyl-terminal-processing peptidase 3, chloroplastic	3.26161	1.16741616890918e-33
LOC108192857	uncharacterized protein LOC108192857	3.25943	1.404185787801e-12
LOC108220713	threonine dehydratase biosynthetic, chloroplastic-like	3.2578	1.404185787801e-12
LOC108209756	dammarenediol II synthase-like	3.25695	1.404185787801e-12
LOC108225447	UDP-glycosyltransferase 90A1	3.25548	0.00506027224476457
LOC108205475	vinorine synthase-like	3.25541	0.00506027224476457
LOC108224301	BTB/POZ domain-containing protein At5g47800	3.25536	6.06704541109922e-14
LOC108199586	carbonic anhydrase 2-like	3.25448	0.00462092991324222
LOC108206789	zinc finger protein CONSTANS-LIKE 4-like	3.25389	5.91257439680675e-12
LOC108207929	kinesin-like protein KIN-7F	3.25297	1.54679042652301e-08
LOC108213293	uncharacterized protein LOC108213293	3.25265	0.00328253241865634
LOC108198397	agamous-like MADS-box protein AGL62	3.25235	0.000739581971527007
LOC108196715	ripening-related protein grip22-like	3.25207	3.4287372210221e-05
LOC108197604	protein BIG GRAIN 1-like E	3.25146	0.000418338639214095
LOC108219774	traB domain-containing protein	3.24986	1.15143007610158e-08
LOC108208516	E3 ubiquitin-protein ligase ZNF645-like	3.24142	1.85130764555941e-08
LOC108228071	ethylene-responsive transcription factor RAP2-12-like	3.23995	1.85130764555941e-08
LOC108201853	TMV resistance protein N-like	3.23849	1.85130764555941e-08
LOC108224086	mannan endo-1,4-beta-mannosidase 7	3.23606	2.31931035820838e-72
LOC108200836	transcription factor TCP15-like	3.23474	7.94849170536078e-16
LOC108200847	transcription factor TCP15-like	3.23474	2.76029484538301e-07
LOC108217587	uncharacterized protein LOC108217587	3.23022	1.78213559954618e-10
LOC108206518	probable WRKY transcription factor 35	3.22933	1.9294534970516e-09
LOC108208900	outer envelope pore protein 16, chloroplastic-like	3.22748	0.000963691507074494
LOC108193390	TVP38/TMEM64 family membrane protein slr0305-like	3.2271	0.000350405444606234
LOC108214544	protein QUIRKY	3.22425	0.00173882279488595
LOC108213002	protein IQ-DOMAIN 1-like	3.22357	1.60310760238984e-05
LOC108222374	zinc finger protein ZAT12-like	3.22143	1.60310760238984e-05
LOC108222382	zinc finger protein ZAT12-like	3.22143	1.34384826132207e-10
LOC108208059	DNA (cytosine-5)-methyltransferase DRM2-like	3.22139	4.88302929890325e-08
LOC108205761	transmembrane protein 64	3.21954	0.000459648437749441
LOC108201855	type IV inositol polyphosphate 5-phosphatase 7-like	3.21797	1.0057085761936e-10
LOC108195094	formin-like protein 20	3.21626	2.37149446642777e-06
LOC108219434	binding partner of ACD11 1	3.21618	4.33076158853453e-09
LOC108219969	photosystem I reaction center subunit XI, chloroplastic-like	3.2154	4.25154156043598e-56
LOC108208830	shaggy-related protein kinase kappa	3.21383	5.02411467065642e-12
LOC108201957	putative ribosomal-protein-alanine acetyltransferase	3.21246	9.569287335682e-68
LOC108194275	probable serine/threonine-protein kinase At1g54610	3.20951	9.569287335682e-68
LOC108201990	dynamin-related protein 4C-like	3.20887	9.569287335682e-68
LOC108221092	uncharacterized protein LOC108221092	3.2087	9.569287335682e-68
LOC108220211	interactor of constitutive active ROPs 4-like	3.20492	9.569287335682e-68
LOC108210398	probable F-box protein At1g60180	3.20448	9.569287335682e-68
LOC108210680	uncharacterized protein LOC108210680	3.20429	6.7413394044629e-08
LOC108208234	uncharacterized protein LOC108208234	3.20149	0.00841617525578429
LOC108215786	disease resistance protein RPP13-like	3.20013	3.24413367775475e-06
LOC108200957	protein GAMETE EXPRESSED 1-like	3.19977	3.24413367775475e-06
LOC108196194	sucrose synthase	3.19971	3.24413367775475e-06
LOC108227367	probable starch synthase 4, chloroplastic/amyloplastic	3.19832	9.05432762004476e-31
LOC108211452	dof zinc finger protein DOF2.1-like	3.19787	2.73817225650028e-05
LOC108204535	fibrous sheath CABYR-binding protein-like	3.19569	2.73817225650028e-05
LOC108203227	pleiotropic drug resistance protein 1-like	3.19528	2.73817225650028e-05
LOC108219563	uncharacterized protein At1g65710	3.19525	2.65717061357403e-39
LOC108222134	zinc finger protein ZAT4-like	3.19482	0.00869854352083661
LOC108217614	myrcene synthase, chloroplastic-like	3.1947	0.000180556238474009
LOC108223308	inner membrane protein PPF-1, chloroplastic	3.19225	1.04882161596918e-41
LOC108209131	CSC1-like protein ERD4	3.19102	0.00665783964392707
LOC108197479	uncharacterized protein LOC108197479	3.18932	2.46603236309645e-05
LOC108197873	uncharacterized protein LOC108197873	3.18658	2.19628847582825e-11
LOC108215173	STS14 protein	3.18652	9.02200397114334e-14
LOC108216255	peroxidase 21	3.18436	0.00703816872813263
LOC108221963	ethylene-responsive transcription factor ERF084	3.18418	0.000318500496676711
LOC108223503	uncharacterized protein LOC108223503	3.18401	8.19550520962383e-11
LOC108195421	nucleobase-ascorbate transporter 3-like	3.18392	5.0210104646628e-06
LOC108213584	vacuolar protein sorting-associated protein 32 homolog 2-like	3.18213	0.000707227015726301
LOC108227131	protein WEAK CHLOROPLAST MOVEMENT UNDER BLUE LIGHT 1-like	3.18153	6.30856334612327e-07
LOC108196305	F-box protein At2g02240-like	3.18067	1.97460328064361e-05
LOC108219708	probable calcium-binding protein CML49	3.18025	2.51895713720673e-06
LOC108215792	probable prolyl 4-hydroxylase 7	3.17737	0.00197803522275607
LOC108206910	sucrose-binding protein-like	3.17685	0.00941322290466116
LOC108209177	uncharacterized protein LOC108209177	3.1767	1.30043073012458e-08
LOC108205821	dihydroceramide fatty acyl 2-hydroxylase FAH2	3.17592	6.51384470228379e-07
LOC108209335	auxin response factor 4	3.17169	0.000574774701180698
LOC108219968	cytochrome b6	3.1714	0.00118005615967151
LOC108223253	calcium uniporter protein 6, mitochondrial-like	3.17124	0.00968524653678932
LOC108214811	receptor-like protein kinase HSL1	3.17037	0.000225046761977942
LOC108212467	serine/threonine-protein phosphatase 7 long form homolog	3.16959	0.00918384838908878
LOC108194269	F-box protein At2g02240-like	3.1683	1.26403387567001e-165
LOC108197429	RPM1-interacting protein 4-like	3.16067	1.58832812116654e-35
LOC108220212	auxin-responsive protein IAA16-like	3.16006	3.62118999700322e-05
LOC108211743	uncharacterized protein LOC108211743	3.15239	7.44651521959699e-07
LOC108228184	protein PLASTID MOVEMENT IMPAIRED 1	3.15143	8.8036885438352e-18
LOC108206820	ACD11 homolog protein	3.15105	1.97803798411615e-05
LOC108223078	leucine-rich repeat receptor-like serine/threonine-protein kinase At1g17230	3.15034	1.95618221505665e-33
LOC108204682	uncharacterized protein LOC108204682	3.15002	1.95618221505665e-33
LOC108204421	pheophytinase, chloroplastic	3.14904	1.95618221505665e-33
LOC108200625	zinc finger protein WIP2-like	3.14867	1.95618221505665e-33
LOC108196254	boron transporter 1-like	3.14806	1.95618221505665e-33
LOC108227577	BTB/POZ domain-containing protein NPY2-like	3.14781	1.03809926003944e-05
LOC108199853	uncharacterized protein LOC108199853	3.14694	2.9817175808217e-10
LOC108193727	uncharacterized protein LOC108193727	3.14554	5.99302793900899e-15
LOC108194505	uncharacterized protein LOC108194505	3.14514	0.000416938640122566
LOC108217109	L-type lectin-domain containing receptor kinase IX.1	3.14248	0.00171117838650043
LOC108193187	probable sulfate transporter 3.3	3.14185	0.00629606365065051
LOC108206429	uncharacterized protein LOC108206429	3.14181	1.04228623270245e-05
LOC108214886	floral homeotic protein APETALA 2-like	3.14088	3.19615984424615e-07
LOC108221887	BEL1-like homeodomain protein 9	3.1403	0.00106501205887931
LOC108214219	truncated transcription factor CAULIFLOWER A	3.13702	5.70312310625651e-07
LOC108214826	uncharacterized protein LOC108214826	3.13662	3.68072428063691e-08
LOC108195296	E3 ubiquitin-protein ligase RHA1B-like	3.13638	3.69853921566568e-06
LOC108224984	uncharacterized protein LOC108224984	3.13562	0.000767051170761232
LOC108202570	putative serine carboxypeptidase-like 23	3.13526	2.89183718456529e-05
LOC108208842	DNA-damage-repair/toleration protein DRT100-like	3.13481	6.78546601120071e-22
LOC108205220	polygalacturonase QRT3-like	3.13468	9.96259339097207e-16
LOC108226244	potassium channel SKOR	3.13294	0.000123605245961072
LOC108220059	protein trichome birefringence	3.13239	4.1227218992932e-12
LOC108217573	protein STRICTOSIDINE SYNTHASE-LIKE 11-like	3.12967	0.00431532253185055
LOC108195338	kinesin-like protein KIN-7G	3.12634	2.35254490808993e-05
LOC108198130	uncharacterized protein LOC108198130	3.12573	3.52312841033961e-05
LOC108194127	syntaxin-related protein KNOLLE-like	3.12548	0.00069557034038344
LOC108193029	myb family transcription factor APL	3.12461	2.78241282840968e-12
LOC108206895	benzyl alcohol O-benzoyltransferase-like	3.12422	0.00376087228475278
LOC108204321	uncharacterized protein LOC108204321	3.12263	6.54820822036962e-06
LOC108217818	lanC-like protein GCL2	3.12156	4.1057655076667e-08
LOC108209781	SPX domain-containing membrane protein At4g22990-like	3.12042	1.3203858163419e-13
LOC108197514	probable WRKY transcription factor 53	3.11792	4.00338069981804e-07
LOC108198921	short-chain dehydrogenase reductase ATA1-like	3.11671	1.82270428399816e-16
LOC108192994	beta carbonic anhydrase 5, chloroplastic-like	3.11651	1.82270428399816e-16
LOC108224861	uncharacterized protein LOC108224861	3.11498	4.47164482265481e-14
LOC108227254	sugar transporter ERD6-like 3	3.11389	1.62726558821711e-05
LOC108227743	tubulin beta-1 chain	3.11337	0.000252173298718314
LOC108196107	beta-amyrin 28-oxidase-like	3.11021	4.71755267743094e-08
LOC108215809	protein PIN-LIKES 3-like	3.10523	0.00391785203226398
LOC108211661	uncharacterized protein LOC108211661	3.10467	3.38632062027389e-11
LOC108227975	protein BPS1, chloroplastic-like	3.10153	0.000176235058358814
LOC108201787	disease resistance protein TAO1-like	3.10047	4.80399668197841e-05
LOC108201938	random slug protein 5	3.10007	0.00362655067593271
LOC108194760	inter alpha-trypsin inhibitor, heavy chain 4	3.09966	2.61538413691702e-06
LOC108213970	putative disease resistance RPP13-like protein 3	3.09883	1.19112238104339e-18
LOC108225717	probable LRR receptor-like serine/threonine-protein kinase At4g37250	3.09844	0.00235930606824847
LOC108224331	dihydroflavonol-4-reductase-like	3.09407	3.61851079479206e-08
LOC108207693	mitogen-activated protein kinase kinase kinase ANP1-like	3.09218	1.27043323926771e-05
LOC108206310	uncharacterized protein ycf23-like	3.09153	0.00896927502095392
LOC108227309	putative lysine-specific demethylase JMJD5	3.08848	0.00650128734690345
LOC108199364	chaperonin 60 subunit beta 4, chloroplastic-like	3.08841	4.18885857238475e-05
LOC108207075	thylakoid lumenal protein TL20.3, chloroplastic	3.08772	2.81548204064418e-19
LOC108200365	vegetative cell wall protein gp1-like	3.08759	1.15698135027645e-05
LOC108204448	uncharacterized protein LOC108204448	3.0857	0.00521575307911738
LOC108210835	glucan endo-1,3-beta-glucosidase 14	3.08276	0.000541611780732532
LOC108208594	lipid transfer-like protein VAS	3.08128	2.3423187580989e-14
LOC108209299	uncharacterized protein LOC108209299	3.08105	3.32947311944994e-05
LOC108205004	wall-associated receptor kinase-like 10	3.07835	7.10809846793729e-08
LOC108220516	auxin-responsive protein IAA31	3.07821	2.78714910501225e-21
LOC108217274	THO complex subunit 4A-like	3.07508	0.0057493137409285
LOC108217262	uncharacterized protein LOC108217262	3.0748	0.00108159790059111
LOC108202849	intracellular ribonuclease LX-like	3.07428	1.82352354959437e-13
LOC108202895	photosystem I reaction center subunit N, chloroplastic	3.07424	1.82352354959437e-13
LOC108198868	psoralen synthase-like	3.07379	1.82352354959437e-13
LOC108200508	uncharacterized N-acetyltransferase YoaA-like	3.07255	1.81226686354813e-58
LOC108200509	uncharacterized N-acetyltransferase YoaA-like	3.07255	2.83583377279866e-19
LOC108206508	uncharacterized protein LOC108206508	3.07229	2.83583377279866e-19
LOC108210611	glucose-1-phosphate adenylyltransferase large subunit 1	3.07211	2.83583377279866e-19
LOC108214535	protein PHLOEM PROTEIN 2-LIKE A1-like	3.07135	2.83583377279866e-19
LOC108208218	3-oxoacyl	3.0709	2.83583377279866e-19
LOC108207715	protein CROWDED NUCLEI 1-like	3.07073	2.56627561780549e-26
LOC108196627	alanine--glyoxylate aminotransferase 2 homolog 2, mitochondrial	3.07065	2.56627561780549e-26
LOC108198461	sugar transport protein 13-like	3.06914	2.56627561780549e-26
LOC108216285	mediator of RNA polymerase II transcription subunit 15-like	3.06749	2.56627561780549e-26
LOC108201942	abscisic acid 8\\'-hydroxylase 1-like	3.06732	5.62598165974718e-06
LOC108199369	F-box/LRR-repeat protein At4g29420	3.06722	5.62598165974718e-06
LOC108222017	uncharacterized protein LOC108222017	3.06666	5.62598165974718e-06
LOC108209548	uncharacterized protein LOC108209548	3.06629	4.43973881005211e-12
LOC108201795	disease resistance-like protein CSA1	3.06575	4.43973881005211e-12
LOC108214694	lanC-like protein GCL1	3.06481	3.17288213299442e-19
LOC108204747	uncharacterized protein LOC108204747	3.06098	1.98360465396261e-18
LOC108220757	serine carboxypeptidase-like 45	3.06076	0.0022004420248103
LOC108200481	uncharacterized protein LOC108200481	3.05948	4.58934748022924e-74
LOC108204384	homeobox-leucine zipper protein ATHB-6	3.05766	6.79071123729163e-10
LOC108207752	chaperone protein dnaJ 20, chloroplastic-like	3.05647	1.89774161100164e-08
LOC108218758	photosystem II 22 kDa protein, chloroplastic	3.05572	9.15940637078055e-05
LOC108221951	uncharacterized protein LOC108221951	3.05253	9.15940637078055e-05
LOC108223626	aquaporin PIP2-1-like	3.05171	4.81936929075771e-26
LOC108220706	probable cysteine protease RD19D	3.05144	1.01364562885873e-08
LOC108223427	tubby-like F-box protein 5	3.05134	5.00567125919344e-05
LOC108216271	uncharacterized protein LOC108216271	3.05081	3.03720312753361e-05
LOC108210615	probable isoaspartyl peptidase/L-asparaginase 2	3.04827	0.00393541830640339
LOC108210628	peptide-N4-(N-acetyl-beta-glucosaminyl)asparagine amidase A	3.04765	5.84228665173959e-15
LOC108215548	UPF0496 protein 4	3.04597	5.67514307499032e-08
LOC108214661	probable leucine-rich repeat receptor-like protein kinase At1g35710	3.0443	0.000180884896682547
LOC108199322	uncharacterized protein LOC108199322	3.04363	0.000180884896682547
LOC108219911	U-box domain-containing protein 9-like	3.04068	1.24630170074201e-12
LOC108206331	homeobox protein BEL1 homolog	3.038	1.8303993758776e-80
LOC108203430	L-arabinokinase-like	3.03154	7.27735448374304e-10
LOC108196714	AT-hook motif nuclear-localized protein 9	3.02565	4.3652780414536e-14
LOC108213289	polyadenylate-binding protein 8-like	3.02239	8.45177554900411e-18
LOC108213110	receptor-like protein 12	3.02237	2.55315133896874e-24
LOC108199602	protein SMAX1-LIKE 6-like	3.02165	0.00421159647168863
LOC108219439	B-box zinc finger protein 21-like	3.02023	4.97810770083222e-26
LOC108195285	rhodanese-like domain-containing protein 10	3.01875	2.25365934137787e-05
LOC108206833	uncharacterized protein LOC108206833	3.01658	2.25365934137787e-05
LOC108210387	uncharacterized protein LOC108210387	3.01453	1.16556229230655e-08
LOC108206908	transcription factor MYC2-like	3.01182	0.00792387336840264
LOC108222433	BAG family molecular chaperone regulator 2-like	3.00845	1.71075053040916e-09
LOC108220370	early nodulin-like protein 2	3.00615	0.00350626623912728
LOC108194429	serine/threonine-protein kinase STE7-like	3.00613	0.00166015798989374
LOC108197767	7-deoxyloganetic acid glucosyltransferase-like	3.00559	0.000139075002126386
LOC108200005	protein kinase 2A, chloroplastic-like	3.00263	0.000554259534313176
LOC108209046	1-aminocyclopropane-1-carboxylate oxidase	3.00143	1.78197990272673e-08
LOC108206194	ACT domain-containing protein ACR8-like	3.00085	5.43582469808256e-11
LOC108198719	WAT1-related protein At2g39510-like	3.00048	0.000157945998948874
LOC108193179	probable inactive histone-lysine N-methyltransferase SUVR2	2.99722	7.05295148681227e-05
LOC108217826	uncharacterized protein LOC108217826	2.99681	0.00493596338135987
LOC108220628	uncharacterized protein LOC108220628	2.99645	0.00349952515857811
LOC108214715	G2/mitotic-specific cyclin S13-7-like	2.99363	0.00349952515857811
LOC108217287	putative disease resistance RPP13-like protein 3	2.99271	0.000102088998584799
LOC108194580	putative nuclease HARBI1	2.99039	0.0016953458281751
LOC108216120	leucine-rich repeat receptor-like protein kinase TDR	2.99016	1.87813094819678e-45
LOC108209094	aquaporin TIP2-1	2.98999	8.20356607213633e-05
LOC108195864	calcineurin subunit B-like	2.98973	1.72105372657065e-19
LOC108213146	receptor-like protein 12	2.98687	0.00475609714875511
LOC108227891	diacylglycerol kinase 2	2.98686	0.00729274491727932
LOC108211957	LOW QUALITY PROTEIN: protein SUPPRESSOR OF GENE SILENCING 3-like	2.98677	3.82882297908383e-12
LOC108227991	probable serine/threonine-protein kinase kinX	2.98574	5.67838029532025e-36
LOC108206726	beta-mannosyltransferase 2-like	2.98566	5.67838029532025e-36
LOC108222012	probable histone H2A.1	2.98559	7.00696796127327e-114
LOC108211362	lecithin-cholesterol acyltransferase-like 1	2.98542	0.00645769058182699
LOC108196158	uncharacterized protein At4g14100-like	2.98494	2.09809254510457e-120
LOC108201824	proline-rich extensin-like protein EPR1	2.98312	3.17255534651783e-57
LOC108208009	uncharacterized protein LOC108208009	2.98282	2.95961189520866e-07
LOC108223154	C2 domain-containing protein At1g53590	2.98254	0.000166492705614826
LOC108227218	DDT domain-containing protein PTM-like	2.98221	9.71070919633268e-06
LOC108227537	thioredoxin-like protein AAED1, chloroplastic	2.98136	9.71070919633268e-06
LOC108193041	glycerate dehydrogenase HPR, peroxisomal	2.97891	9.71070919633268e-06
LOC108225127	UPF0496 protein At4g34320-like	2.97865	1.0692862755892e-05
LOC108220208	uncharacterized protein LOC108220208	2.97508	2.04138265391827e-16
LOC108224981	uncharacterized protein LOC108224981	2.97485	2.04138265391827e-16
LOC108219016	chlorophyll a-b binding protein CP26, chloroplastic	2.97466	0.000340942060436525
LOC108219246	uncharacterized hydrolase YugF	2.97381	1.77769456952208e-16
LOC108197485	solute carrier family 25 member 44-like	2.97289	0.00682682117017643
LOC108215433	putative F-box protein At1g67390	2.9713	4.18106317529857e-31
LOC108226579	uncharacterized protein LOC108226579	2.97026	4.99334074590956e-06
LOC108208047	PRA1 family protein F2-like	2.969	0.000387770942502349
LOC108209570	uncharacterized protein LOC108209570	2.96762	2.42730277566564e-07
LOC108226733	uncharacterized protein LOC108226733	2.96473	1.01302474982093e-28
LOC108210011	serine carboxypeptidase-like 20	2.96459	3.81033332030318e-39
LOC108225558	probable linoleate 9S-lipoxygenase 5	2.96174	6.43911075638473e-10
LOC108206024	uncharacterized protein LOC108206024	2.96014	8.65072768020021e-93
LOC108223961	protein E6-like	2.95921	0.00187803308000361
LOC108212500	uncharacterized protein LOC108212500	2.95845	0.00187803308000361
LOC108222872	pathogenesis-related genes transcriptional activator PTI6-like	2.95837	5.37800621938256e-05
LOC108225556	cysteine proteinase COT44-like	2.95825	0.000921478038366279
LOC108200003	uncharacterized protein LOC108200003	2.95581	2.03571114292525e-08
LOC108195905	phosphate transporter PHO1 homolog 3-like	2.95308	1.18541876019848e-05
LOC108226947	microtubule-associated protein 70-5-like	2.94861	0.00530495530354247
LOC108199871	alpha-xylosidase 1-like	2.9476	0.00530495530354247
LOC108211959	uncharacterized protein LOC108211959	2.9475	1.34422685560643e-15
LOC108210191	CTD small phosphatase-like protein 2	2.94728	4.9241104330734e-05
LOC108220264	uncharacterized protein LOC108220264	2.94532	8.03775007357685e-37
LOC108220450	circumsporozoite protein-like	2.94436	6.03225281073457e-07
LOC108195147	uncharacterized protein LOC108195147	2.9443	0.000301044090583396
LOC108213646	tryptophan aminotransferase-related protein 4-like	2.94311	0.000301044090583396
LOC108224470	bet1-like protein At4g14600	2.94224	5.69976195815158e-137
LOC108209699	protein trichome birefringence-like 14	2.93965	5.82790832423474e-05
LOC108217884	uncharacterized protein LOC108217884	2.93758	1.45781797410727e-10
LOC108215468	cytochrome P450 93A3-like	2.93737	0.00539219900426095
LOC108204108	receptor-like protein 12	2.9373	6.31281827750322e-08
LOC108218427	probable galactinol--sucrose galactosyltransferase 2	2.93605	6.16954865288368e-07
LOC108207987	copper transporter 6-like	2.93556	0.000963671550721685
LOC108218677	probable amino-acid racemase	2.93303	7.16124464228906e-73
LOC108216158	lipid droplet-associated hydrolase	2.93288	0.00126118873449358
LOC108218835	phosphatidylinositol 4-phosphate 5-kinase 1-like	2.93283	2.01030379422561e-53
LOC108211852	uncharacterized protein LOC108211852	2.93004	4.88644821616601e-05
LOC108217763	uncharacterized protein LOC108217763	2.92845	4.18838560960049e-09
LOC108215759	nitrate reductase	2.92676	9.7113474330645e-09
LOC108205045	uncharacterized protein LOC108205045	2.92667	2.30693467769402e-12
LOC108198354	abscisic acid receptor PYL9-like	2.92564	7.94110070707886e-16
LOC108204758	paramyosin-like	2.92537	3.57403894597858e-09
LOC108206143	heavy metal-associated isoprenylated plant protein 21-like	2.92527	0.000303002393515678
LOC108207095	probable disease resistance protein At1g59620	2.9237	0.000303002393515678
LOC108206172	PLASMODESMATA CALLOSE-BINDING PROTEIN 4	2.92092	1.33932701850791e-35
LOC108221151	uncharacterized protein LOC108221151	2.91543	8.38247459894249e-12
LOC108226628	uncharacterized protein LOC108226628	2.91503	4.00082774827013e-16
LOC108227876	uncharacterized protein LOC108227876	2.91488	1.43303853948707e-36
LOC108224360	cytochrome c1-like	2.91466	6.57280817886042e-05
LOC108216505	formin-like protein 13	2.91196	4.10265306835228e-10
LOC108223674	transcription factor bHLH143-like	2.91167	1.72743242568827e-05
LOC108205297	kinesin-4	2.91021	6.35249019962495e-68
LOC108206739	oleosin 1-like	2.91	1.13299739312019e-05
LOC108194245	transcription factor TCP20-like	2.90595	6.57280817886042e-05
LOC108224901	putative aminoacrylate hydrolase RutD	2.9047	4.99443941003954e-06
LOC108210986	probable folate-biopterin transporter 7	2.90362	4.83484142574074e-09
LOC108220452	BRI1 kinase inhibitor 1-like	2.90342	1.26925104490604e-14
LOC108213006	probable glutamate carboxypeptidase 2	2.90215	2.03165422880583e-64
LOC108208514	protein NRT1/ PTR FAMILY 4.4-like	2.90179	1.32372813134517e-06
LOC108213536	uncharacterized protein LOC108213536	2.9016	0.000353458222752581
LOC108208055	uncharacterized protein LOC108208055	2.90157	0.00167841714054818
LOC108205227	DNA (cytosine-5)-methyltransferase 1B-like	2.90109	0.00479472554733412
LOC108225454	(R)-mandelonitrile lyase-like	2.90108	0.00133520631568147
LOC108211543	uncharacterized protein LOC108211543	2.90055	2.36701768516545e-74
LOC108214460	cell division cycle 20.1, cofactor of APC complex-like	2.89766	0.00215641419302777
LOC108196164	protein IQ-DOMAIN 1-like	2.89352	1.61673758646086e-05
LOC108207089	cytochrome P450 CYP736A12-like	2.89248	2.54017459743078e-06
LOC108206579	transcription factor bHLH80	2.89095	2.54017459743078e-06
LOC108201744	abscisic-aldehyde oxidase-like	2.8905	0.000624115800219194
LOC108198665	protein MALE DISCOVERER 2-like	2.88814	0.000861881901334246
LOC108193658	choline/ethanolaminephosphotransferase 1-like	2.88664	0.000861881901334246
LOC108197599	uncharacterized protein LOC108197599	2.88498	2.23424206055156e-08
LOC108227234	transcription factor DIVARICATA	2.88476	3.27012410754769e-15
LOC108202851	mediator of RNA polymerase II transcription subunit 33A-like	2.88464	0.00111027905495396
LOC108210522	protein argonaute 1-like	2.88251	8.73735786480534e-81
LOC108213004	probable glutamate carboxypeptidase 2	2.8819	0.000545482832475208
LOC108211584	heavy metal-associated isoprenylated plant protein 3-like	2.8795	4.6435761909942e-19
LOC108195865	uncharacterized protein LOC108195865	2.87786	4.6435761909942e-19
LOC108215374	xyloglucan endotransglucosylase/hydrolase protein 9-like	2.87646	3.06783176487677e-06
LOC108215052	phosphoinositide phospholipase C 2-like	2.87172	5.35086936909813e-06
LOC108220043	shewanella-like protein phosphatase 1	2.87102	2.93695934600878e-47
LOC108200999	N-alpha-acetyltransferase 16, NatA auxiliary subunit-like	2.87083	0.00154569057527846
LOC108205914	probable protein phosphatase 2C 25	2.86928	1.59434073561998e-10
LOC108199667	uncharacterized protein LOC108199667	2.8689	8.66509441793516e-21
LOC108224014	uncharacterized protein LOC108224014	2.86738	3.70774783417582e-26
LOC108219153	uncharacterized protein LOC108219153	2.86625	5.1848977864995e-11
LOC108215929	UDP-glycosyltransferase 91A1-like	2.86406	5.1848977864995e-11
LOC108211065	uncharacterized protein At5g41620-like	2.86276	0.00278390639048432
LOC108211252	photosystem I subunit O	2.86221	2.56411136957699e-29
LOC108213235	pectin acetylesterase 9-like	2.86151	5.0940235338906e-05
LOC108223266	endoglucanase 11-like	2.86096	9.36351409836343e-08
LOC108195348	ethylene-responsive transcription factor CRF4-like	2.86086	8.64496985949443e-19
LOC108225742	F-box/WD repeat-containing protein 7	2.85851	0.00199382294625966
LOC108209256	granule-bound starch synthase 1, chloroplastic/amyloplastic	2.85711	1.08255446189564e-22
LOC108204858	ferric reduction oxidase 7, chloroplastic-like	2.85646	0.000651091653868783
LOC108220066	uncharacterized protein LOC108220066	2.85258	0.000675961325591081
LOC108218934	cellulose synthase-like protein D3	2.85063	9.06060072892743e-09
LOC108204826	probable leucine-rich repeat receptor-like protein kinase At5g49770	2.85062	2.33646427772103e-11
LOC108225520	BURP domain protein USPL1-like	2.84791	9.51397264461312e-06
LOC108199706	serine/threonine-protein kinase tricorner-like	2.84716	0.00032743927283725
LOC108210598	protein indeterminate-domain 9	2.8466	0.00132748812361797
LOC108195040	uncharacterized protein LOC108195040	2.84648	0.00343679496173844
LOC108196072	probable cyclic nucleotide-gated ion channel 20, chloroplastic	2.84588	0.00343679496173844
LOC108207974	protein LURP-one-related 11-like	2.84397	6.61232350500788e-33
LOC108196908	cysteine-rich receptor-like protein kinase 10	2.84346	6.61232350500788e-33
LOC108225472	uncharacterized protein At5g03900, chloroplastic-like	2.84244	0.006910198616829
LOC108207978	benzyl alcohol O-benzoyltransferase-like	2.84243	7.06667371645177e-30
LOC108216024	membrin-11	2.84167	7.06667371645177e-30
LOC108217426	receptor like protein 30-like	2.84016	7.06667371645177e-30
LOC108226510	rho GDP-dissociation inhibitor 1-like	2.83865	7.06667371645177e-30
LOC108209738	patatin-like protein 7	2.83773	2.82876612976566e-12
LOC108227579	amino acid permease 3-like	2.83728	0.000322366082926886
LOC108205803	scarecrow-like protein 28	2.8372	0.000322366082926886
LOC108196458	UV-B-induced protein At3g17800, chloroplastic	2.83714	7.72127565803601e-09
LOC108214706	uncharacterized protein LOC108214706	2.835	7.72127565803601e-09
LOC108193991	serine carboxypeptidase-like 45	2.83288	1.39602142331464e-64
LOC108201737	uncharacterized protein LOC108201737	2.82973	1.39602142331464e-64
LOC108220812	RING-H2 finger protein ATL74-like	2.82943	0.00828793158957333
LOC108209968	homeobox-leucine zipper protein ATHB-14-like	2.82902	0.000566068458443077
LOC108200665	transmembrane protein 53-like	2.82831	0.000566068458443077
LOC108211255	methylsterol monooxygenase 1-1-like	2.82615	0.000566068458443077
LOC108208376	zinc finger protein ZAT5-like	2.82599	4.42337298684107e-35
LOC108199611	uncharacterized protein LOC108199611	2.82513	7.94417926374622e-47
LOC108203122	probable pectate lyase 8	2.82449	3.21979602367141e-08
LOC108208876	phosphoribulokinase, chloroplastic	2.82409	0.00077353112106694
LOC108226922	uncharacterized protein LOC108226922	2.82373	0.00077353112106694
LOC108217753	diacylglycerol O-acyltransferase 2	2.82315	0.00077353112106694
LOC108193451	polygalacturonase 1 beta-like protein 3	2.82181	4.52642874346403e-22
LOC108213644	uncharacterized protein LOC108213644	2.82028	4.38673299769739e-05
LOC108225578	F-box protein At5g07670-like	2.8194	0.00117341729927244
LOC108210675	alpha carbonic anhydrase 1, chloroplastic-like	2.81871	1.35381945825216e-13
LOC108224057	MLO-like protein 1	2.8162	2.35399236126091e-38
LOC108200358	ankyrin repeat-containing protein At2g01680	2.81595	2.35399236126091e-38
LOC108225245	homeobox-leucine zipper protein ANTHOCYANINLESS 2-like	2.81559	0.00057555170575597
LOC108210563	uncharacterized protein LOC108210563	2.81353	1.11611833422366e-07
LOC108197980	protein TRANSPORT INHIBITOR RESPONSE 1-like	2.81351	1.11611833422366e-07
LOC108216328	uncharacterized protein LOC108216328	2.81292	8.49126013372706e-30
LOC108194215	inorganic pyrophosphatase 2-like	2.8102	8.49126013372706e-30
LOC108195532	LEAF RUST 10 DISEASE-RESISTANCE LOCUS RECEPTOR-LIKE PROTEIN KINASE-like 2.1	2.80971	8.49126013372706e-30
LOC108206539	homeobox-leucine zipper protein HAT4	2.80945	1.79959055101968e-05
LOC108204432	protein NRT1/ PTR FAMILY 4.3-like	2.80927	1.79959055101968e-05
LOC108206590	uncharacterized protein LOC108206590	2.80869	1.79959055101968e-05
LOC108197762	uncharacterized protein LOC108197762	2.80855	8.50624130095234e-06
LOC108226443	mavicyanin-like	2.80565	8.50624130095234e-06
LOC108226887	protein SHI RELATED SEQUENCE 3-like	2.80455	1.52645089746725e-08
LOC108220838	protein QUIRKY	2.80402	2.36238001863454e-23
LOC108210511	PLASMODESMATA CALLOSE-BINDING PROTEIN 2-like	2.80402	2.36238001863454e-23
LOC108219528	magnesium-protoporphyrin IX monomethyl ester	2.80156	2.36238001863454e-23
LOC108226050	serine carboxypeptidase-like 40	2.80145	2.36238001863454e-23
LOC108195482	uncharacterized protein LOC108195482	2.80138	2.36238001863454e-23
LOC108216511	G2/mitotic-specific cyclin S13-7-like	2.80095	2.36238001863454e-23
LOC108221633	uncharacterized protein LOC108221633	2.80048	2.36238001863454e-23
LOC108215772	probable trehalose-phosphate phosphatase J	2.80006	2.36238001863454e-23
LOC108196836	uncharacterized protein LOC108196836	2.79988	1.11540458520039e-11
LOC108210376	dehydration-responsive element-binding protein 1D-like	2.79934	2.26875375042069e-10
LOC108224616	glucose-1-phosphate adenylyltransferase large subunit 1-like	2.79863	0.000907333471069467
LOC108206540	putative glutathione-specific gamma-glutamylcyclotransferase 2	2.79732	0.000907333471069467
LOC108209459	uncharacterized protein LOC108209459	2.79683	0.00472697367801904
LOC108193939	plastidal glycolate/glycerate translocator 1, chloroplastic-like	2.79345	3.78964164940757e-05
LOC108218391	receptor-like protein kinase HAIKU2	2.79162	3.78964164940757e-05
LOC108215186	plant intracellular Ras-group-related LRR protein 6-like	2.79119	3.78964164940757e-05
LOC108199121	uncharacterized protein LOC108199121	2.79065	3.78964164940757e-05
LOC108215392	PLASMODESMATA CALLOSE-BINDING PROTEIN 2-like	2.7901	3.78964164940757e-05
LOC108218687	uncharacterized protein LOC108218687	2.789	1.1376534853816e-06
LOC108225370	reticulon-like protein B17	2.78898	9.83264961937768e-05
LOC108220428	metallothionein-like protein type 2	2.78348	9.83264961937768e-05
LOC108198960	AP2-like ethylene-responsive transcription factor At1g16060	2.78334	1.23520183410673e-06
LOC108192945	probable inactive purple acid phosphatase 16	2.78243	1.23520183410673e-06
LOC108220745	uncharacterized protein LOC108220745	2.78236	1.23520183410673e-06
LOC108198673	meiotic recombination protein DMC1 homolog	2.78111	1.29829631430939e-05
LOC108206999	solanesyl-diphosphate synthase 1, mitochondrial-like	2.78091	7.55864668598213e-30
LOC108199279	phosphatidylinositol 4-kinase gamma 7-like	2.77945	0.000353069287459929
LOC108210814	uncharacterized protein LOC108210814	2.77918	3.46846247797323e-05
LOC108217593	receptor-like serine/threonine-protein kinase NCRK	2.779	3.46846247797323e-05
LOC108202890	uncharacterized protein LOC108202890	2.77509	3.46846247797323e-05
LOC108208991	protein NSP-INTERACTING KINASE 1-like	2.77471	2.46847385704781e-59
LOC108196055	dnaJ homolog subfamily C member 2	2.77358	3.33529208544834e-05
LOC108218423	RNA polymerase sigma factor sigE, chloroplastic/mitochondrial	2.77353	3.42430761092433e-10
LOC108211241	protein LIGHT-DEPENDENT SHORT HYPOCOTYLS 10-like	2.77309	1.39798328966834e-26
LOC108227268	protein TSS	2.77186	2.39625472490782e-07
LOC108209123	probable receptor-like protein kinase At5g15080	2.77185	1.64029241689523e-07
LOC108226989	monoterpene synthase-like	2.77132	1.64029241689523e-07
LOC108210815	uncharacterized protein LOC108210815	2.77	1.64029241689523e-07
LOC108220214	transcription factor DIVARICATA-like	2.76962	1.64029241689523e-07
LOC108213294	uncharacterized protein LOC108213294	2.76901	1.64029241689523e-07
LOC108204595	uncharacterized protein LOC108204595	2.76876	2.49045483659077e-10
LOC108212992	RING-H2 finger protein ATL78-like	2.76805	2.84738431957778e-29
LOC108227942	IST1 homolog	2.76699	2.84738431957778e-29
LOC108208722	probable inactive serine/threonine-protein kinase slob2	2.76649	9.42774750494681e-05
LOC108211170	shikimate O-hydroxycinnamoyltransferase-like	2.76552	0.00291136200613425
LOC108213796	ethylene-responsive transcription factor CRF4-like	2.76115	0.00291136200613425
LOC108214044	uncharacterized protein LOC108214044	2.76097	3.96293052714463e-38
LOC108223805	leucine-rich repeat receptor-like protein kinase PXC1	2.7598	3.96293052714463e-38
LOC108223162	cyclin-A1-1	2.75878	3.96293052714463e-38
LOC108225476	probable NAD(P)H dehydrogenase (quinone) FQR1-like 1	2.75856	3.96293052714463e-38
LOC108214199	putative quinone-oxidoreductase homolog, chloroplastic	2.75603	3.78555942809202e-19
LOC108220308	peptidyl-prolyl cis-trans isomerase FKBP18, chloroplastic	2.75424	2.9787071528719e-14
LOC108201606	beta-glucosidase 4-like	2.75233	1.52087347468742e-30
LOC108211710	glucan endo-1,3-beta-glucosidase, acidic-like	2.7494	1.20463298220599e-15
LOC108200036	uncharacterized protein LOC108200036	2.74745	7.00926957661358e-44
LOC108195203	uncharacterized protein LOC108195203	2.74462	4.9839834106906e-25
LOC108199707	putative nuclease HARBI1	2.74363	1.66899424176401e-47
LOC108197649	probable protein phosphatase 2C 73	2.74352	5.24409697812902e-05
LOC108210374	G-type lectin S-receptor-like serine/threonine-protein kinase At4g27290	2.74351	1.75421775594671e-14
LOC108214632	probable pectinesterase/pectinesterase inhibitor 51	2.74349	1.82561066974042e-07
LOC108217611	LOW QUALITY PROTEIN: xyloglucan endotransglucosylase/hydrolase protein 15-like	2.74317	1.84711209231343e-26
LOC108217671	uncharacterized protein LOC108217671	2.74292	0.0012538528005586
LOC108193273	probable inactive leucine-rich repeat receptor-like protein kinase At3g03770	2.74224	3.57110808848309e-08
LOC108199585	2-methylene-furan-3-one reductase	2.74194	2.07957188981334e-05
LOC108219220	yrdC domain-containing protein, mitochondrial-like	2.7415	2.07957188981334e-05
LOC108222913	uncharacterized protein LOC108222913	2.74099	2.07957188981334e-05
LOC108210770	F-box protein CPR30-like	2.74042	2.07957188981334e-05
LOC108216430	protein SMAX1-LIKE 3	2.74027	9.66083367831307e-12
LOC108196016	probable GTP diphosphokinase RSH3, chloroplastic	2.73963	0.00161529239079369
LOC108219036	potassium channel AKT1-like	2.73962	2.51235490195519e-36
LOC108217714	uncharacterized protein LOC108217714	2.73895	5.35515143532847e-35
LOC108199569	F-box protein SKIP16	2.73624	3.56733823609925e-07
LOC108223843	ABC transporter B family member 28	2.73572	2.01343904665351e-22
LOC108225020	dof zinc finger protein DOF5.4	2.73524	4.00825356938815e-111
LOC108193043	endoglucanase 11-like	2.73264	4.00825356938815e-111
LOC108208769	endoribonuclease Dicer homolog 2-like	2.73113	4.00825356938815e-111
LOC108194543	uncharacterized protein LOC108194543	2.73088	4.00825356938815e-111
LOC108202860	uncharacterized protein DDB_G0290685	2.73063	0.0020445573990619
LOC108223071	E3 ubiquitin-protein ligase RNF8-like	2.73007	0.000810430724795142
LOC108199906	abscisic acid receptor PYL9-like	2.72833	5.37148457288913e-05
LOC108210602	L-type lectin-domain containing receptor kinase VIII.1	2.72809	5.37148457288913e-05
LOC108212143	probable LRR receptor-like serine/threonine-protein kinase At3g47570	2.72594	2.08428078298915e-18
LOC108211635	uncharacterized protein LOC108211635	2.72513	0.0058661065305573
LOC108220290	uncharacterized protein At4g14100-like	2.7223	0.0058661065305573
LOC108218451	uncharacterized protein LOC108218451	2.72213	0.0058661065305573
LOC108208200	uncharacterized protein LOC108208200	2.72172	0.0058661065305573
LOC108215872	rhodanese-like domain-containing protein 14, chloroplastic	2.72153	0.0058661065305573
LOC108222317	rho GTPase-activating protein 2-like, partial	2.72129	4.28132072492283e-07
LOC108214757	probable protein phosphatase 2C 78	2.72055	5.45396579729138e-05
LOC108196128	protein SIEVE ELEMENT OCCLUSION B-like	2.72044	5.32444801579684e-10
LOC108209796	protein FAM135B-like	2.71881	5.32444801579684e-10
LOC108211287	uncharacterized protein At5g48480-like	2.71793	5.32444801579684e-10
LOC108202495	disease resistance protein TAO1-like	2.71737	5.32444801579684e-10
LOC108217582	uncharacterized protein LOC108217582	2.71699	0.00435638730413526
LOC108197403	probable xyloglucan endotransglucosylase/hydrolase protein 28	2.71574	0.00435638730413526
LOC108215092	dehydration-responsive element-binding protein 1B-like	2.71468	0.00435638730413526
LOC108222252	probable E3 ubiquitin-protein ligase XERICO	2.71322	2.71526894059374e-07
LOC108219406	uncharacterized protein LOC108219406	2.71078	4.46441242948426e-11
LOC108226291	two-component response regulator-like PRR95	2.71067	1.97285820288227e-06
LOC108208265	uncharacterized protein LOC108208265	2.71023	1.97285820288227e-06
LOC108219447	glyceraldehyde-3-phosphate dehydrogenase B, chloroplastic-like	2.71021	2.4040612331944e-23
LOC108226407	E3 ubiquitin-protein ligase CCNB1IP1 homolog	2.70971	2.4040612331944e-23
LOC108219465	leucine-rich repeat extensin-like protein 5	2.70738	6.03356007273256e-07
LOC108204844	uncharacterized protein LOC108204844	2.70636	1.67147316874246e-15
LOC108216623	probable aminotransferase TAT2	2.7056	1.67147316874246e-15
LOC108215584	glucan endo-1,3-beta-glucosidase 12-like	2.70362	1.67147316874246e-15
LOC108192996	periaxin-like	2.70325	6.27349539332973e-06
LOC108194499	non-specific lipid transfer protein GPI-anchored 2-like	2.70261	2.24121708291806e-05
LOC108216683	uncharacterized protein LOC108216683	2.70192	1.00937612211556e-06
LOC108210237	ABC transporter G family member 11-like	2.70108	1.00937612211556e-06
LOC108200032	serine/threonine-protein kinase STY8-like	2.70054	1.00937612211556e-06
LOC108210666	uncharacterized protein LOC108210666	2.69892	5.09265337257228e-29
LOC108194249	uncharacterized protein LOC108194249	2.69808	5.09265337257228e-29
LOC108207753	protein argonaute 2-like	2.6978	5.09265337257228e-29
LOC108200280	extra-large guanine nucleotide-binding protein 1-like	2.69755	1.32336687941412e-94
LOC108214432	phosphoinositide phospholipase C 2-like	2.69735	0.00526234461431871
LOC108200255	auxin-responsive protein IAA7-like	2.69189	0.00526234461431871
LOC108194058	uncharacterized protein LOC108194058	2.6906	1.7362726409939e-23
LOC108218508	AAA-ATPase At3g50940-like	2.68955	1.7362726409939e-23
LOC108206294	protein TRANSPORT INHIBITOR RESPONSE 1-like	2.688	1.7362726409939e-23
LOC108196378	uncharacterized protein LOC108196378	2.68682	5.2821903834772e-08
LOC108197317	auxin-responsive protein IAA27-like	2.68674	7.16472259310864e-12
LOC108209386	tropinone reductase homolog At5g06060-like	2.68643	6.52162598593041e-07
LOC108194117	hydrophobic protein RCI2B	2.68609	1.22954063200173e-16
LOC108213013	NAC domain-containing protein 91	2.68449	1.94004858122618e-11
LOC108214665	probable galacturonosyltransferase-like 7	2.6844	9.17591622410322e-05
LOC108193809	calcium-transporting ATPase 12, plasma membrane-type-like	2.68323	0.000863088353657287
LOC108196755	subtilisin-like protease SBT1.1	2.68174	0.000863088353657287
LOC108218461	transcription elongation factor SPT6-like	2.68054	0.000105786003025033
LOC108212067	uncharacterized protein LOC108212067	2.67935	0.00568082370201021
LOC108218986	calcium-transporting ATPase 9, plasma membrane-type-like	2.67934	1.10006067269339e-20
LOC108197683	protein RALF-like 24	2.6788	5.01536321853522e-91
LOC108211942	uncharacterized protein LOC108211942	2.67761	5.01536321853522e-91
LOC108208716	7-deoxyloganetin glucosyltransferase-like	2.67742	1.9739442105644e-48
LOC108211785	glutamate receptor 3.2-like	2.67314	1.9739442105644e-48
LOC108209543	uncharacterized protein LOC108209543	2.67193	1.9739442105644e-48
LOC108224100	geraniol 8-hydroxylase-like	2.67192	2.90552692000625e-05
LOC108215685	probable auxin efflux carrier component 1b	2.67096	3.5402271029588e-31
LOC108214216	uncharacterized protein LOC108214216	2.66998	2.60736392092194e-16
LOC108202575	probable receptor-like protein kinase At5g18500	2.66919	2.7317140287634e-96
LOC108210506	uncharacterized protein LOC108210506	2.66842	0.000764242184220055
LOC108200054	protein IQ-DOMAIN 1-like	2.66782	0.000764242184220055
LOC108198840	kinesin-related protein 6-like	2.66628	0.000764242184220055
LOC108194799	TMV resistance protein N-like	2.66619	3.29358026451638e-13
LOC108208040	transcription factor LUX	2.66518	0.00518883374434867
LOC108218349	probable LRR receptor-like serine/threonine-protein kinase At1g53440	2.66123	3.52744956614219e-23
LOC108217602	probable galacturonosyltransferase 15	2.66085	3.52744956614219e-23
LOC108205081	ACT domain-containing protein ACR3	2.66074	8.28346367210844e-14
LOC108208118	TATA-binding protein-associated factor 2N	2.65904	6.92047795176297e-93
LOC108227981	OTU domain-containing protein DDB_G0284757	2.65758	0.000757240335066777
LOC108198694	mitochondrial substrate carrier family protein P	2.65757	0.000757240335066777
LOC108223294	uncharacterized protein LOC108223294	2.65724	0.000757240335066777
LOC108221729	leucine-rich repeat extensin-like protein 1	2.65631	0.000757240335066777
LOC108194538	uncharacterized protein LOC108194538	2.65582	1.00311648584338e-35
LOC108197754	rho GDP-dissociation inhibitor 1	2.65523	1.00311648584338e-35
LOC108223254	50S ribosomal protein L17	2.65482	0.000139080529997143
LOC108203159	root phototropism protein 3-like	2.65394	3.68750026920958e-05
LOC108196411	cell division cycle 20.1, cofactor of APC complex-like	2.65328	3.68750026920958e-05
LOC108215525	RHOMBOID-like protein 3	2.65157	2.53761534400477e-06
LOC108222487	auxin-responsive protein SAUR15-like	2.64846	0.00248952351174081
LOC108216468	uncharacterized protein LOC108216468	2.64815	1.49786833521736e-16
LOC108227315	uncharacterized protein At4g02000-like	2.64813	5.17581497136731e-08
LOC108210574	xylulose kinase-like	2.64632	7.65551783344578e-66
LOC108217427	MDIS1-interacting receptor like kinase 2-like	2.6462	1.98638276204516e-31
LOC108213109	probable WRKY transcription factor 53	2.64509	1.98638276204516e-31
LOC108206248	transcription factor bHLH112-like	2.64404	1.98638276204516e-31
LOC108215315	uncharacterized calcium-binding protein At1g02270	2.64235	1.98638276204516e-31
LOC108206059	adenine phosphoribosyltransferase 3	2.6421	1.98638276204516e-31
LOC108209261	expansin-like A2	2.64131	1.98638276204516e-31
LOC108225383	protein QUIRKY-like	2.64016	1.98638276204516e-31
LOC108224683	protein ACCELERATED CELL DEATH 6-like	2.63918	0.000434191637152747
LOC108223736	D-2-hydroxyglutarate dehydrogenase, mitochondrial	2.63909	6.06242882114406e-06
LOC108202907	probable peroxisomal membrane protein PEX1	2.63863	4.96700776557624e-100
LOC108218625	photosystem I reaction center subunit V, chloroplastic	2.63764	2.5662317401955e-15
LOC108196100	uncharacterized protein LOC108196100	2.63671	1.0848857361958e-05
LOC108225789	uncharacterized protein LOC108225789	2.6358	4.28477801774095e-16
LOC108200400	probable inactive leucine-rich repeat receptor-like protein kinase At1g66830	2.63372	4.28477801774095e-16
LOC108225777	uncharacterized protein LOC108225777	2.63249	4.28477801774095e-16
LOC108215641	monogalactosyldiacylglycerol synthase 2, chloroplastic-like	2.629	1.06470246371576e-25
LOC108220683	BTB/POZ domain-containing protein At1g55760-like	2.62738	1.06470246371576e-25
LOC108193057	cytochrome P450 78A6-like	2.62696	2.74014506882898e-05
LOC108212597	kinesin-like protein KIN-1	2.62552	2.74014506882898e-05
LOC108211888	alpha-galactosidase-like	2.6242	2.74014506882898e-05
LOC108219327	protein WEAK CHLOROPLAST MOVEMENT UNDER BLUE LIGHT 1-like	2.6234	2.74014506882898e-05
LOC108213064	PRA1 family protein F2-like	2.62305	2.74014506882898e-05
LOC108193640	probable cyclin-dependent serine/threonine-protein kinase DDB_G0292550	2.62207	2.74014506882898e-05
LOC108202855	ninja-family protein AFP1	2.62159	0.000291963148845676
LOC108195008	putative F-box protein At3g16210	2.62063	0.000291963148845676
LOC108198861	4-coumarate--CoA ligase-like 1	2.62045	0.000291963148845676
LOC108226258	transcription termination factor MTEF1, chloroplastic, partial	2.62034	0.000291963148845676
LOC108204877	protein QUIRKY-like	2.61865	9.3181801210882e-05
LOC108220171	auxin response factor 18-like	2.61863	9.3181801210882e-05
LOC108227016	aquaporin SIP1-2-like	2.6166	2.32858234868232e-40
LOC108212517	uncharacterized protein LOC108212517	2.61506	2.32858234868232e-40
LOC108222860	CBL-interacting serine/threonine-protein kinase 6-like	2.61242	1.16926175146555e-08
LOC108216798	heavy metal-associated isoprenylated plant protein 20	2.61164	1.16926175146555e-08
LOC108215209	protein SIEVE ELEMENT OCCLUSION B-like	2.61144	0.00427974595772411
LOC108213365	uncharacterized protein LOC108213365	2.61097	2.48488801089549e-06
LOC108214568	protein LONGIFOLIA 1-like	2.60974	1.21028348757719e-21
LOC108222562	WUSCHEL-related homeobox 6-like	2.60873	8.16771259085829e-17
LOC108222008	protein GLUTAMINE DUMPER 2-like	2.60817	0.00186938443875661
LOC108195944	probable BOI-related E3 ubiquitin-protein ligase 2	2.60611	9.60646763436904e-06
LOC108196816	beta-1,4-mannosyl-glycoprotein 4-beta-N-acetylglucosaminyltransferase-like	2.60586	9.60646763436904e-06
LOC108208097	uncharacterized protein LOC108208097	2.60559	4.13584710605648e-29
LOC108205251	glutamate receptor 2.4-like	2.60514	9.04968050854573e-25
LOC108197842	MDIS1-interacting receptor like kinase 2-like	2.60494	0.00754636017688427
LOC108220277	uncharacterized protein LOC108220277	2.60439	8.79040393947536e-15
LOC108210676	probable WRKY transcription factor 13	2.60303	0.000603806560426609
LOC108220599	CASP-like protein 5A2	2.60276	0.0028199871152807
LOC108210766	homeobox-leucine zipper protein HAT5	2.60239	0.0028199871152807
LOC108224554	uncharacterized protein LOC108224554	2.60231	3.51112956148955e-13
LOC108227795	homeobox-leucine zipper protein ATHB-15-like	2.60174	0
LOC108216958	uncharacterized protein LOC108216958	2.59969	1.1936683075734e-81
LOC108202739	putative F-box protein At3g16210	2.59938	2.4035655039294e-12
LOC108214298	oxygen-evolving enhancer protein 1, chloroplastic-like	2.5982	1.86155027242676e-23
LOC108218700	uncharacterized protein LOC108218700	2.59809	8.0574275839895e-29
LOC108222087	GDP-mannose transporter GONST4-like	2.59621	1.23875262862234e-07
LOC108200952	auxin response factor 1-like	2.59619	1.23875262862234e-07
LOC108197792	syntaxin-related protein KNOLLE-like	2.59618	1.23875262862234e-07
LOC108207968	TMV resistance protein N-like	2.59579	1.23875262862234e-07
LOC108197448	chlorophyll a-b binding protein, chloroplastic	2.59417	1.23875262862234e-07
LOC108211133	alpha,alpha-trehalose-phosphate synthase	2.59402	0.0003683963887531
LOC108224769	exocyst complex component EXO70A1-like	2.59208	1.33667100614613e-17
LOC108200611	uncharacterized protein LOC108200611	2.58963	7.60745079097989e-13
LOC108223497	LOW QUALITY PROTEIN: uncharacterized protein LOC108223497	2.58863	1.86537495510708e-40
LOC108209815	uncharacterized protein LOC108209815	2.58776	5.94515331481197e-52
LOC108206416	potassium channel AKT1	2.58543	5.94515331481197e-52
LOC108210725	cytochrome P450 90A1	2.58376	5.94515331481197e-52
LOC108208637	probable sulfate transporter 3.4	2.58289	0.00385421487943217
LOC108209754	pentatricopeptide repeat-containing protein At4g01030, mitochondrial	2.58152	1.22917344514801e-09
LOC108220976	wall-associated receptor kinase 2-like	2.58134	1.22917344514801e-09
LOC108218434	uncharacterized protein LOC108218434	2.58055	8.59182387498713e-05
LOC108218406	uncharacterized protein LOC108218406	2.58044	3.79559258389772e-20
LOC108220897	fasciclin-like arabinogalactan protein 12	2.57886	3.79559258389772e-20
LOC108223110	EPIDERMAL PATTERNING FACTOR-like protein 9	2.57804	0.00210267320728525
LOC108212525	aspartic proteinase-like protein 2	2.57458	5.16014026549544e-12
LOC108218420	DELLA protein GAI	2.57441	6.65723889059642e-57
LOC108215689	uncharacterized protein LOC108215689	2.57332	2.04821130308871e-05
LOC108224851	F-box protein SKIP23-like	2.57326	3.64183647890509e-09
LOC108210620	ribulose bisphosphate carboxylase/oxygenase activase, chloroplastic-like	2.57162	1.17711032021523e-19
LOC108193001	growth-regulating factor 3-like	2.57157	1.17711032021523e-19
LOC108225038	auxilin-like protein 1	2.57033	1.17711032021523e-19
LOC108193438	acyl-protein thioesterase 2-like	2.57011	1.17711032021523e-19
LOC108228111	protein TSS-like	2.5684	1.17711032021523e-19
LOC108206437	growth-regulating factor 9-like	2.56745	1.17711032021523e-19
LOC108218501	probable plastid-lipid-associated protein 14, chloroplastic	2.56689	1.17711032021523e-19
LOC108225243	BTB/POZ domain-containing protein NPY1	2.56639	1.17711032021523e-19
LOC108211441	putative ALA-interacting subunit 4	2.56516	1.17711032021523e-19
LOC108197628	probable prolyl 4-hydroxylase 9	2.56429	3.22492915553339e-08
LOC108211374	probable prolyl 4-hydroxylase 9	2.56429	3.96467037314098e-07
LOC108205415	serine carboxypeptidase-like 7	2.56412	3.96467037314098e-07
LOC108221057	floral homeotic protein APETALA 2-like	2.56366	3.96467037314098e-07
LOC108214893	uncharacterized protein LOC108214893	2.56304	3.96467037314098e-07
LOC108198407	glutaminase kidney isoform, mitochondrial-like	2.56253	3.3085187733831e-48
LOC108193562	ACT domain-containing protein ACR11-like	2.55952	3.3085187733831e-48
LOC108206864	F-box/LRR-repeat protein At3g48880-like	2.55929	2.61528635417229e-23
LOC108200882	two-component response regulator ORR26	2.5591	3.06248240068973e-11
LOC108216597	uncharacterized protein LOC108216597	2.55647	3.06248240068973e-11
LOC108210924	LRR receptor-like serine/threonine-protein kinase RCH1	2.55608	3.06248240068973e-11
LOC108223284	patellin-3-like	2.55602	3.55513077066338e-17
LOC108209689	U-box domain-containing protein 14	2.55148	9.87460330098756e-10
LOC108197460	type IV inositol polyphosphate 5-phosphatase 7	2.55052	9.87460330098756e-10
LOC108203807	probable leucine-rich repeat receptor-like protein kinase At5g49770	2.5477	4.59487623844417e-07
LOC108209526	homeobox-leucine zipper protein ATHB-15	2.54755	4.39560032015369e-07
LOC108227226	oxygen-evolving enhancer protein 2, chloroplastic	2.54615	4.39560032015369e-07
LOC108211500	F-box/FBD/LRR-repeat protein At1g13570-like	2.54354	4.39560032015369e-07
LOC108211679	anthocyanidin 3-O-glucoside 6\\'\\'-O-acyltransferase-like	2.542	4.39560032015369e-07
LOC108204383	serine/threonine-protein kinase STY46-like	2.54097	6.24395032652751e-44
LOC108195943	alanine aminotransferase 1, mitochondrial	2.53963	1.98919922318615e-06
LOC108194261	aspartic proteinase PCS1-like	2.53726	9.61554330139172e-48
LOC108214196	4-alpha-glucanotransferase, chloroplastic/amyloplastic	2.53704	5.88256471526243e-17
LOC108211604	replication protein A 70 kDa DNA-binding subunit B-like	2.53615	5.88256471526243e-17
LOC108212353	uncharacterized protein LOC108212353	2.53553	5.03195498348699e-06
LOC108206749	uncharacterized protein LOC108206749	2.53468	5.03195498348699e-06
LOC108209443	protein CHUP1, chloroplastic-like	2.53273	5.03195498348699e-06
LOC108202111	cellulose synthase A catalytic subunit 2	2.53268	5.03195498348699e-06
LOC108199928	phosphoglucomutase, chloroplastic	2.53204	5.03195498348699e-06
LOC108220997	uncharacterized protein LOC108220997	2.5303	5.03195498348699e-06
LOC108227326	vesicle-associated protein 1-1-like	2.52946	5.03195498348699e-06
LOC108205069	homeobox-leucine zipper protein ATHB-14-like	2.5292	5.03195498348699e-06
LOC108219187	ubiquitin carboxyl-terminal hydrolase 15-like	2.52861	5.03195498348699e-06
LOC108208919	phosphomethylpyrimidine synthase, chloroplastic	2.52663	0.000221178409996517
LOC108222864	dicer-like protein 4	2.5264	0.00204956446805119
LOC108209686	transcription factor bHLH71-like	2.52602	0.00255876300601295
LOC108215071	leucine-rich repeat receptor-like tyrosine-protein kinase PXC3	2.52543	0.00322588707184589
LOC108202429	187-kDa microtubule-associated protein AIR9	2.52433	7.25548734135591e-21
LOC108208155	WAT1-related protein At5g47470	2.52425	7.25548734135591e-21
LOC108208729	uncharacterized protein LOC108208729	2.52408	7.25548734135591e-21
LOC108215131	VAN3-binding protein-like	2.52282	0.00496647118707399
LOC108223962	uncharacterized protein LOC108223962	2.51935	0.00934270919213918
LOC108219291	heterogeneous nuclear ribonucleoprotein 1	2.519	0.00934270919213918
LOC108216536	NAC domain-containing protein 86-like	2.51773	0.00934270919213918
LOC108225574	probable E3 ubiquitin ligase complex SCF subunit sconB	2.51649	4.22493522131829e-48
LOC108226632	uncharacterized protein LOC108226632	2.51573	6.22504562016389e-10
LOC108194087	hydrophobic protein RCI2A-like	2.51374	2.50563345888272e-05
LOC108214736	remorin	2.51338	2.50563345888272e-05
LOC108219044	transcription factor TCP20	2.51269	1.52542157540183e-18
LOC108227252	sugar transporter ERD6-like 3	2.50967	5.76324359392655e-64
LOC108202709	E3 ubiquitin-protein ligase RDUF2-like	2.50653	3.36110258280583e-06
LOC108214122	calcium-dependent protein kinase 29	2.5063	4.89472523222325e-33
LOC108219310	homeotic protein knotted-1-like	2.50497	4.89472523222325e-33
LOC108202540	histone-lysine N-methyltransferase ATX1-like	2.50457	1.18039885366285e-29
LOC108192798	organic cation/carnitine transporter 7-like	2.50211	1.18039885366285e-29
LOC108206149	putative phospholipid:diacylglycerol acyltransferase 2	2.50119	1.18039885366285e-29
LOC108214751	probable alpha,alpha-trehalose-phosphate synthase	2.5007	1.18039885366285e-29
LOC108202556	transcription factor bHLH79	2.49976	1.25070810748226e-08
LOC108209755	abscisic acid receptor PYL9	2.4995	5.38832188949536e-05
LOC108214007	L-Ala-D/L-amino acid epimerase-like	2.49935	8.05580223535001e-05
LOC108223853	protein argonaute MEL1-like	2.49881	0.000164254740564417
LOC108221937	ferredoxin--NADP reductase, leaf-type isozyme, chloroplastic-like	2.49867	0.000164254740564417
LOC108220810	probable WRKY transcription factor 65	2.4977	0.000164254740564417
LOC108200895	galactinol synthase 2-like	2.49693	0.000164254740564417
LOC108220697	maf-like protein DDB_G0281937	2.49665	0.000164254740564417
LOC108195985	nuclear poly(A) polymerase 4-like	2.49651	0.000164254740564417
LOC108209659	pyruvate kinase isozyme G, chloroplastic	2.49583	1.20034716886144e-07
LOC108221141	pleiotropic drug resistance protein 1-like	2.49499	4.85007391792449e-87
LOC108214189	diacylglycerol kinase 5	2.49391	4.85007391792449e-87
LOC108197076	beta-1,4-mannosyl-glycoprotein 4-beta-N-acetylglucosaminyltransferase-like	2.49352	2.83270492077811e-38
LOC108214562	villin-4-like	2.49304	0.00867834929090352
LOC108208981	nuclear transport factor 2-like	2.49106	0.00867834929090352
LOC108228055	protochlorophyllide reductase	2.48954	0.00546157318724314
LOC108216519	cycloartenol Synthase-like	2.48925	0.00546157318724314
LOC108223623	receptor-like serine/threonine-protein kinase ALE2	2.48843	0.00715792251909722
LOC108222789	dicer-like protein 4	2.48538	0.00715792251909722
LOC108218388	uncharacterized protein LOC108218388	2.48525	9.71042630105813e-05
LOC108220894	BTB/POZ and TAZ domain-containing protein 1-like	2.48337	8.48340575177221e-37
LOC108209900	ankyrin repeat domain-containing protein 13C	2.48323	8.48340575177221e-37
LOC108214127	70 kDa peptidyl-prolyl isomerase-like	2.4806	8.48340575177221e-37
LOC108211917	probable xyloglucan endotransglucosylase/hydrolase protein 32	2.47867	8.48340575177221e-37
LOC108200103	uncharacterized protein LOC108200103	2.47856	3.55255060827847e-10
LOC108217597	zinc finger MYM-type protein 1-like	2.47802	3.25247162782024e-08
LOC108196555	ferric reduction oxidase 8, mitochondrial	2.47635	2.08315066536758e-06
LOC108199876	scarecrow-like protein 13	2.47531	2.08315066536758e-06
LOC108196009	B3 domain-containing transcription repressor VAL2-like	2.47203	5.94052667435876e-07
LOC108215136	inactive protein kinase SELMODRAFT_444075-like	2.47128	5.94052667435876e-07
LOC108221241	uncharacterized protein LOC108221241	2.4706	0.0014796395550269
LOC108218572	tubulin beta-2 chain	2.47054	1.25564634329051e-35
LOC108192935	receptor protein kinase TMK1-like	2.47036	4.22867335993593e-14
LOC108214378	glutaredoxin-C6-like	2.46878	0.00528211178023954
LOC108224618	protein SMAX1-LIKE 4	2.46722	8.50272171086293e-65
LOC108217360	uncharacterized protein LOC108217360	2.46589	8.50272171086293e-65
LOC108225207	ethylene-responsive transcription factor 4-like	2.46561	8.50272171086293e-65
LOC108197192	protein LURP-one-related 15-like	2.46365	6.56890740508969e-11
LOC108222727	uncharacterized protein LOC108222727	2.46334	9.87293608583228e-41
LOC108201011	(S)-coclaurine N-methyltransferase	2.46164	4.7765208087888e-06
LOC108206091	uncharacterized protein LOC108206091	2.45913	5.88655732748174e-16
LOC108194304	trihelix transcription factor GT-3b-like	2.45893	7.19988768827114e-12
LOC108208744	beta-glucosidase BoGH3B	2.45834	7.19988768827114e-12
LOC108209956	phosphoinositide phospholipase C 4-like	2.45831	7.19988768827114e-12
LOC108226980	lysine-rich arabinogalactan protein 19-like	2.45773	0.000111767520640252
LOC108204424	uncharacterized protein LOC108204424	2.45762	0.000111767520640252
LOC108215037	pentatricopeptide repeat-containing protein At5g21222-like	2.45602	0.000111767520640252
LOC108211564	thaumatin-like protein	2.45585	0.000111767520640252
LOC108225716	extra-large guanine nucleotide-binding protein 1-like	2.45453	0.000111767520640252
LOC108213591	F-box protein At1g61340-like	2.45295	3.05070185487636e-81
LOC108194132	uncharacterized protein LOC108194132	2.4527	1.19157170993087e-36
LOC108206984	protein CHUP1, chloroplastic	2.45106	0.00839694157296532
LOC108213342	uncharacterized protein LOC108213342	2.44791	2.17053966667696e-21
LOC108222715	protein QUIRKY-like	2.44745	2.17053966667696e-21
LOC108205852	serine carboxypeptidase-like	2.44732	2.17053966667696e-21
LOC108204839	SNF2 domain-containing protein CLASSY 3-like	2.44649	3.05121873711214e-08
LOC108208820	protein DETOXIFICATION 40-like	2.44637	3.78122291835388e-12
LOC108215930	3-oxoacyl	2.44588	7.1354242792582e-11
LOC108196363	wall-associated receptor kinase-like 14	2.44477	1.80619120313602e-07
LOC108213095	uncharacterized protein LOC108213095	2.44441	1.03166491380052e-18
LOC108202869	uncharacterized protein LOC108202869	2.4434	1.03166491380052e-18
LOC108225293	transcription factor bHLH123-like	2.44272	3.38683074096764e-09
LOC108193369	probable methyltransferase PMT23	2.44194	0.00147066912637471
LOC108222408	sucrose synthase 2-like	2.4417	1.07984366466669e-48
LOC108220020	uncharacterized protein LOC108220020	2.4408	2.10171758005179e-11
LOC108204455	probable serine/threonine-protein kinase drkD	2.4404	2.10171758005179e-11
LOC108195523	cyclic nucleotide-gated ion channel 4-like	2.43939	1.07000196072567e-10
LOC108222441	uncharacterized protein LOC108222441	2.43897	1.19990866131485e-05
LOC108224527	uncharacterized membrane protein At1g16860-like	2.43895	1.19990866131485e-05
LOC108218965	probable serine/threonine protein kinase IRE4	2.43745	9.05879848222324e-20
LOC108197748	abrin-b-like	2.43652	2.23382904184703e-05
LOC108205084	DNA oxidative demethylase ALKBH2	2.43642	2.13255515414271e-09
LOC108209715	uncharacterized protein LOC108209715	2.4355	2.13255515414271e-09
LOC108197138	uncharacterized protein LOC108197138	2.43459	2.69254965281985e-09
LOC108213347	agamous-like MADS-box protein AGL12	2.43365	2.69254965281985e-09
LOC108197506	transcription factor bHLH147	2.43149	2.69254965281985e-09
LOC108211683	uncharacterized hydrolase YugF-like	2.43114	2.69254965281985e-09
LOC108218287	uncharacterized protein LOC108218287	2.43081	1.42261128432118e-21
LOC108206642	protein FAF-like, chloroplastic	2.42952	1.42261128432118e-21
LOC108199699	probable receptor-like protein kinase At1g30570	2.42929	0.00455625449370027
LOC108207896	uncharacterized protein LOC108207896	2.42905	7.37960781006102e-05
LOC108204373	probable transmembrane GTPase FZO-like, chloroplastic	2.42849	2.70840355878616e-18
LOC108200727	uncharacterized protein LOC108200727	2.42834	0.0005739843719331
LOC108217596	zinc finger MYM-type protein 1-like	2.42738	0.0005739843719331
LOC108222829	pleiotropic drug resistance protein 1-like	2.42628	2.54688634412494e-08
LOC108197178	uncharacterized protein LOC108197178	2.4251	1.52161560511548e-39
LOC108220736	lysine-specific demethylase JMJ25-like	2.42504	1.52161560511548e-39
LOC108222766	bifunctional dihydroflavonol 4-reductase/flavanone 4-reductase-like	2.42336	4.70768109949114e-19
LOC108196376	methylthioribose-1-phosphate isomerase	2.42286	4.70768109949114e-19
LOC108208895	alpha-glucan phosphorylase, H isozyme	2.42244	8.18561668445159e-09
LOC108220777	dof zinc finger protein DOF5.1-like	2.41849	1.86251583357329e-08
LOC108215358	putative ABC transporter B family member 8	2.41783	0.00288256219207553
LOC108198027	methyltransferase-like protein 13	2.41775	5.21542758617835e-08
LOC108218853	serine/threonine-protein kinase EDR1-like	2.41703	0.000230314701101285
LOC108206159	probable protein phosphatase 2C 24	2.41698	0.000230314701101285
LOC108214599	CSC1-like protein RXW8	2.41625	0.00201744618627928
LOC108217774	aspartic proteinase-like protein 1	2.41543	1.53690323489803e-43
LOC108211179	exocyst complex component EXO70A1-like	2.41267	4.11795662285013e-09
LOC108196008	uncharacterized protein LOC108196008	2.41194	4.11795662285013e-09
LOC108210738	protein yippee-like At4g27745	2.4118	4.11795662285013e-09
LOC108207411	uncharacterized protein LOC108207411	2.41097	4.11795662285013e-09
LOC108225794	uncharacterized protein LOC108225794	2.41084	4.11795662285013e-09
LOC108200698	uncharacterized protein LOC108200698	2.41039	4.11795662285013e-09
LOC108220504	MLO-like protein 14	2.4095	7.48520740694805e-11
LOC108196026	S-adenosylmethionine decarboxylase proenzyme	2.4059	7.48520740694805e-11
LOC108223267	uncharacterized protein LOC108223267	2.40508	0.00874377545862657
LOC108210388	pentatricopeptide repeat-containing protein At2g45350, chloroplastic	2.40336	0.00874377545862657
LOC108199515	vesicle-associated membrane protein 721-like	2.40217	1.51824221038523e-06
LOC108222373	putative F-box protein At1g32420	2.40121	1.5946481961775e-08
LOC108206542	uncharacterized protein LOC108206542	2.3995	0.000453463542783474
LOC108218130	uncharacterized protein LOC108218130	2.39913	0.000453463542783474
LOC108211925	replication protein A 70 kDa DNA-binding subunit D-like	2.39913	7.46637789429327e-05
LOC108211160	protein STRICTOSIDINE SYNTHASE-LIKE 4-like	2.39794	5.13381883000141e-17
LOC108215820	target of Myb protein 1-like	2.39748	4.79863281281823e-46
LOC108203183	homeobox-leucine zipper protein HAT5-like	2.39639	8.51946195218685e-11
LOC108202614	acyltransferase-like protein At1g54570, chloroplastic	2.39444	3.10610872276456e-47
LOC108219071	TMV resistance protein N-like	2.39409	6.07980492717798e-06
LOC108205133	aspartyl protease family protein At5g10770-like	2.39395	6.07980492717798e-06
LOC108225338	protein STRICTOSIDINE SYNTHASE-LIKE 10-like	2.39362	0.00448147506728769
LOC108225006	WAT1-related protein At5g07050-like	2.3926	2.22479189276611e-05
LOC108210118	aspartic proteinase A1-like	2.39203	2.22479189276611e-05
LOC108220552	3-epi-6-deoxocathasterone 23-monooxygenase	2.39189	4.94203709463019e-114
LOC108215788	AT-rich interactive domain-containing protein 5	2.39187	1.46989109509021e-33
LOC108218690	uncharacterized protein LOC108218690	2.39017	1.46989109509021e-33
LOC108211204	mannitol dehydrogenase-like	2.38989	1.46989109509021e-33
LOC108204705	uncharacterized protein LOC108204705	2.38904	0.000486320318207044
LOC108195156	membrane-anchored ubiquitin-fold protein 2-like	2.38883	6.76494989283266e-23
LOC108216103	CSC1-like protein RXW8	2.38762	0.00959462775630264
LOC108216490	phosphoglucan phosphatase LSF2, chloroplastic	2.38746	2.49516571161161e-06
LOC108199187	pumilio homolog 1-like	2.38475	5.32289992761126e-05
LOC108227400	probable galactinol--sucrose galactosyltransferase 2	2.38465	5.32289992761126e-05
LOC108211838	probable acyl-activating enzyme 5, peroxisomal	2.38324	5.32289992761126e-05
LOC108200716	AAA-ATPase At4g30250-like	2.38304	0.00154236739184401
LOC108205774	probable WRKY transcription factor 30	2.38284	0.00154236739184401
LOC108220808	uncharacterized protein LOC108220808	2.38193	0.00154236739184401
LOC108192937	homeobox-leucine zipper protein REVOLUTA	2.38134	4.82656771055309e-06
LOC108211265	sodium transporter HKT1-like	2.38133	4.82656771055309e-06
LOC108206025	transcription factor bHLH30-like	2.37975	7.58858333185927e-05
LOC108224332	BTB/POZ and TAZ domain-containing protein 1-like	2.37758	3.97369595241497e-05
LOC108223167	probable receptor-like serine/threonine-protein kinase At5g57670	2.37426	8.06452425498068e-06
LOC108200622	chalcone synthase 1	2.37372	3.20269700277038e-39
LOC108219424	amino acid permease 3-like	2.37367	0.000264031054643296
LOC108212589	uncharacterized protein LOC108212589	2.37365	0.000264031054643296
LOC108214299	cold-regulated 413 plasma membrane protein 2	2.37363	0.000264031054643296
LOC108208741	F-box protein PP2-A12-like	2.37246	0.000264031054643296
LOC108203477	uncharacterized protein LOC108203477	2.37199	5.74926722886509e-05
LOC108196861	G-type lectin S-receptor-like serine/threonine-protein kinase At4g27290	2.36961	0.00208724345655453
LOC108219763	protein MARD1-like	2.36902	0.00439037492056128
LOC108219678	pentatricopeptide repeat-containing protein At1g79080, chloroplastic-like	2.36742	3.03650985130805e-16
LOC108219915	uncharacterized protein LOC108219915	2.3662	0.000159617296804534
LOC108194667	protein FAR1-RELATED SEQUENCE 5-like	2.36585	6.87554300343115e-11
LOC108212539	uncharacterized protein LOC108212539	2.36532	6.87554300343115e-11
LOC108209015	uncharacterized protein LOC108209015	2.36528	6.87554300343115e-11
LOC108197300	kinesin-like protein KIF22	2.36471	6.87554300343115e-11
LOC108219046	uncharacterized protein LOC108219046	2.3642	6.87554300343115e-11
LOC108206167	yrdC domain-containing protein, mitochondrial	2.36356	0.00673435349069542
LOC108208475	respiratory burst oxidase homolog protein B-like	2.36185	0.00673435349069542
LOC108195265	nuclear transport factor 2-like	2.36115	0.00673435349069542
LOC108223679	protein NUCLEAR FUSION DEFECTIVE 4-like	2.36079	0.00673435349069542
LOC108194026	biotin carboxylase 1, chloroplastic-like	2.35968	0.00673435349069542
LOC108200818	probable protein phosphatase 2C 14	2.35715	0.00673435349069542
LOC108193137	cyclic dof factor 1-like	2.35654	0.000828869846213385
LOC108221111	auxin-induced protein 22A-like	2.35345	0.000828869846213385
LOC108220845	protein FAF-like, chloroplastic	2.35174	6.53495965545754e-05
LOC108206838	uncharacterized protein LOC108206838	2.34991	4.71577685735599e-09
LOC108226234	probable polygalacturonase At1g80170	2.34973	6.9392928246342e-116
LOC108215266	uncharacterized protein LOC108215266	2.3494	6.9392928246342e-116
LOC108205917	bifunctional epoxide hydrolase 2-like	2.34636	6.9392928246342e-116
LOC108222785	F-box protein At3g07870-like	2.34393	0.000205317901502185
LOC108218738	uncharacterized protein LOC108218738	2.34331	3.06348754753482e-32
LOC108209573	polygalacturonase QRT3-like	2.34328	3.06348754753482e-32
LOC108215751	probable arabinosyltransferase ARAD1	2.34279	3.06348754753482e-32
LOC108220758	protein IQ-DOMAIN 14-like	2.34191	0.00841311077106914
LOC108219579	ethylene-responsive transcription factor 4	2.33852	0.00841311077106914
LOC108205056	probable pectinesterase/pectinesterase inhibitor 51	2.33801	0.00841311077106914
LOC108195450	uncharacterized protein LOC108195450	2.33609	8.29742368408138e-45
LOC108194318	pentatricopeptide repeat-containing protein At1g62930, chloroplastic-like	2.33597	2.8796143618884e-106
LOC108198234	G-type lectin S-receptor-like serine/threonine-protein kinase RKS1	2.33589	2.8796143618884e-106
LOC108193506	uncharacterized protein LOC108193506	2.33542	2.8796143618884e-106
LOC108202979	sanguinarine reductase	2.33455	2.8796143618884e-106
LOC108197445	uncharacterized protein LOC108197445	2.33369	2.8796143618884e-106
LOC108215408	3\\'-hydroxy-N-methyl-(S)-coclaurine 4\\'-O-methyltransferase 2-like	2.33226	2.8796143618884e-106
LOC108211738	cytochrome P450 81E8-like	2.33223	1.69472992335786e-22
LOC108202752	photosystem II 5 kDa protein, chloroplastic	2.33185	1.69472992335786e-22
LOC108220191	transcription factor TCP14	2.33128	6.00294440521608e-06
LOC108211052	actin-depolymerizing factor	2.33121	7.30740385143691e-14
LOC108224600	chorismate mutase 2	2.32908	0.00110813128322106
LOC108222989	magnesium transporter MRS2-I-like	2.32816	7.05517661271815e-41
LOC108204284	probable protein phosphatase 2C 53	2.32747	0.000545052683593033
LOC108225274	uncharacterized protein LOC108225274	2.32541	0.000545052683593033
LOC108197643	LRR receptor-like serine/threonine-protein kinase GSO1	2.32508	0.000872962783445206
LOC108227749	SPX and EXS domain-containing protein 1-like	2.32389	1.96976361421139e-33
LOC108211851	monogalactosyldiacylglycerol synthase 2, chloroplastic-like	2.32321	1.96976361421139e-33
LOC108209576	remorin	2.32302	1.17322885447388e-05
LOC108225692	uncharacterized protein LOC108225692	2.32233	3.91558010633067e-19
LOC108199317	adagio protein 3	2.3215	0.00401744113036824
LOC108214857	abscisic acid receptor PYL8-like	2.31891	0.00401744113036824
LOC108199983	MAP3K epsilon protein kinase 1-like	2.3172	8.70326553311666e-62
LOC108215965	dehydration-responsive element-binding protein 2A-like	2.31659	0.00338290105181987
LOC108199875	uncharacterized protein LOC108199875	2.31564	0.00448670665551523
LOC108227708	psbP-like protein 1, chloroplastic	2.3156	3.06269724152981e-29
LOC108193482	cyclin-dependent kinase inhibitor 7-like	2.31496	5.61736120627401e-23
LOC108202887	probable polygalacturonase	2.31449	0.00737032765410125
LOC108214170	uncharacterized protein LOC108214170	2.31266	0.00650275302946999
LOC108204900	aspartic proteinase A1-like	2.3125	3.18902138597034e-53
LOC108222630	putative proline-rich receptor-like protein kinase PERK6	2.31179	1.66018380117412e-08
LOC108211413	uncharacterized protein LOC108211413	2.3113	6.70302661463389e-45
LOC108221939	uncharacterized protein LOC108221939	2.31056	7.47346776694128e-14
LOC108198426	uncharacterized protein LOC108198426	2.30948	3.42506394257818e-05
LOC108214549	WAT1-related protein At3g28050-like	2.30926	3.42506394257818e-05
LOC108215710	BTB/POZ domain-containing protein At1g55760-like	2.30872	3.42506394257818e-05
LOC108205866	ABC transporter B family member 15-like	2.3083	6.22519363964357e-32
LOC108211615	cyclin-dependent kinase B2-1	2.30605	1.25612461863271e-12
LOC108210663	fructose-1,6-bisphosphatase, chloroplastic-like	2.30264	4.06444342966654e-190
LOC108214792	proline transporter 1-like	2.30198	1.94740598469841e-05
LOC108219740	probable pectate lyase 8	2.30065	0.0045926655343879
LOC108219733	photosynthetic NDH subunit of subcomplex B 1, chloroplastic	2.30065	4.37719607407465e-08
LOC108225526	uncharacterized protein LOC108225526	2.30031	0.00195776232004477
LOC108219603	codeine O-demethylase-like	2.30011	0.00195776232004477
LOC108193714	U-box domain-containing protein 19-like	2.29969	1.50612060115542e-10
LOC108225314	fasciclin-like arabinogalactan protein 7	2.29716	1.42098493197846e-06
LOC108200590	leucine-rich repeat receptor-like serine/threonine-protein kinase BAM3	2.2965	0.00133965179566294
LOC108216145	heptahelical transmembrane protein 1-like	2.29591	0.00133965179566294
LOC108212112	uncharacterized protein LOC108212112	2.29393	1.00633683174079e-05
LOC108212113	uncharacterized protein LOC108212113	2.29393	3.15452271576719e-06
LOC108209322	O-glucosyltransferase rumi homolog	2.29306	3.15452271576719e-06
LOC108216206	ENTH domain-containing protein C794.11c	2.29182	8.98731034221951e-14
LOC108214866	NAC domain-containing protein 91-like	2.29107	8.98731034221951e-14
LOC108227508	peroxisomal (S)-2-hydroxy-acid oxidase GLO1	2.29028	0.00259737529638947
LOC108215961	FHA domain-containing protein PS1	2.29011	6.48157954949509e-08
LOC108216778	65-kDa microtubule-associated protein 3-like, partial	2.28662	0.00346121306186046
LOC108217172	protein FAR1-RELATED SEQUENCE 5-like	2.28608	4.09367053336591e-12
LOC108204484	protein MARD1-like	2.284	2.21232819124047e-18
LOC108208963	peroxisomal biogenesis factor 6	2.28395	0.00298228530931356
LOC108216218	cell cycle checkpoint protein RAD17	2.28386	1.70551715353201e-06
LOC108213275	dehydration-responsive element-binding protein 1B-like	2.28261	7.97552043627561e-12
LOC108216363	protein JASON	2.2823	7.86149803040967e-15
LOC108218283	chlorophyll a-b binding protein 8, chloroplastic	2.28079	7.86149803040967e-15
LOC108207993	probable prolyl 4-hydroxylase 6	2.27997	6.42926631254256e-11
LOC108224576	probable 6-phosphogluconolactonase 4, chloroplastic	2.27964	6.42926631254256e-11
LOC108226315	pEARLI1-like lipid transfer protein 3	2.2789	6.42926631254256e-11
LOC108227882	uncharacterized protein LOC108227882	2.27722	6.42926631254256e-11
LOC108205404	rop guanine nucleotide exchange factor 14	2.27507	6.42926631254256e-11
LOC108200570	ferredoxin-like	2.27471	6.42926631254256e-11
LOC108218661	putative disease resistance protein At4g19050	2.27303	6.42926631254256e-11
LOC108214010	L-Ala-D/L-amino acid epimerase-like	2.27287	4.84521520610187e-15
LOC108202418	vegetative cell wall protein gp1-like	2.27286	4.84521520610187e-15
LOC108223996	poly	2.27211	0.00273609083344896
LOC108212128	protein ATAF2-like	2.26914	3.52780961071781e-25
LOC108214414	F-box protein FBW2-like	2.26906	3.52780961071781e-25
LOC108200305	protein SIEVE ELEMENT OCCLUSION B-like	2.26856	1.93260508293704e-10
LOC108217630	MADS-box protein JOINTLESS	2.26525	2.72346772857123e-09
LOC108224996	dentin sialophosphoprotein	2.26321	0.00428337127023511
LOC108201127	uncharacterized protein LOC108201127	2.263	0.00428337127023511
LOC108219764	protein TORNADO 1	2.26122	5.8575232994649e-09
LOC108220848	uncharacterized protein LOC108220848	2.26079	4.50154181672438e-05
LOC108220358	blue copper protein-like	2.25927	6.95019086873197e-28
LOC108218282	chlorophyll a-b binding protein 8, chloroplastic	2.2573	4.93325415764218e-05
LOC108220952	flavonol synthase/flavanone 3-hydroxylase-like	2.25712	1.50550723995528e-05
LOC108219217	probable acyl-activating enzyme 1, peroxisomal	2.25637	0.000296120205145025
LOC108215960	protein NRT1/ PTR FAMILY 4.5-like	2.25622	9.81981579594729e-42
LOC108220184	uncharacterized protein LOC108220184	2.25602	1.81735527640056e-16
LOC108217616	xyloglucan endotransglucosylase/hydrolase 2-like	2.2547	0.000485933624827545
LOC108205720	heat stress transcription factor A-6b-like	2.25351	1.52685605850104e-05
LOC108223352	microtubule-associated protein TORTIFOLIA1-like	2.2519	3.44567318554367e-22
LOC108214686	serine/threonine-protein kinase At5g01020-like	2.25162	3.44567318554367e-22
LOC108226999	IRK-interacting protein	2.25149	6.90284900252706e-32
LOC108197130	putative pentatricopeptide repeat-containing protein At3g13770, mitochondrial	2.25051	0.00268401991843763
LOC108201847	amidase 1	2.2503	3.38850111996924e-07
LOC108223581	photosystem I reaction center subunit IV, chloroplastic	2.24912	3.38850111996924e-07
LOC108197214	PLASMODESMATA CALLOSE-BINDING PROTEIN 3	2.24776	9.11264572578732e-06
LOC108213384	uncharacterized protein LOC108213384	2.24724	9.11264572578732e-06
LOC108226358	tetrahydrocannabinolic acid synthase-like	2.24696	4.94101890937627e-11
LOC108203186	uncharacterized protein LOC108203186	2.24587	9.6365047164043e-34
LOC108216746	gibberellin 2-beta-dioxygenase 1-like	2.24575	1.79200828184801e-21
LOC108202618	probable RNA-dependent RNA polymerase 1	2.24519	1.79200828184801e-21
LOC108227586	CSC1-like protein HYP1	2.24457	0.00933012238577258
LOC108209380	metacaspase-2-like	2.24373	2.34551841440028e-06
LOC108224956	beta-glucosidase 44-like	2.24308	0.00177100504297102
LOC108208584	dicarboxylate transporter 2.1, chloroplastic-like	2.24202	0.00177100504297102
LOC108226314	uncharacterized protein LOC108226314	2.242	9.83264961937768e-05
LOC108208180	protein NDR1-like	2.24194	9.83264961937768e-05
LOC108199770	protein argonaute 10-like	2.24185	0.00488532772836682
LOC108197534	aspartyl protease family protein 2	2.24165	0.00128687267760096
LOC108212123	uncharacterized protein LOC108212123	2.24069	3.84541727279834e-16
LOC108223489	photosystem II 10 kDa polypeptide, chloroplastic-like	2.23952	0.00106256182393725
LOC108227173	probable pectinesterase/pectinesterase inhibitor 34	2.239	6.88301500388902e-07
LOC108214794	proline transporter 1-like	2.23881	0.000203924515865773
LOC108193940	maf-like protein DDB_G0281937	2.2387	4.91632785049043e-41
LOC108209126	protein LIGHT-DEPENDENT SHORT HYPOCOTYLS 10-like	2.23855	0.000425645256422744
LOC108206954	peroxidase 19	2.23661	0.000425645256422744
LOC108201365	uncharacterized protein LOC108201365	2.23574	0.000425645256422744
LOC108204813	probable aquaporin PIP2-8	2.23555	0.000425645256422744
LOC108220509	uncharacterized protein LOC108220509	2.23531	0.000425645256422744
LOC108194222	pectin acetylesterase 8-like	2.23483	0.000425645256422744
LOC108216589	uncharacterized protein At1g04910-like	2.23393	2.70915509463271e-22
LOC108201378	uncharacterized protein LOC108201378	2.23369	0.0075782785401188
LOC108203470	uncharacterized protein LOC108203470	2.23358	4.6841664493428e-11
LOC108227779	CCR4-NOT transcription complex subunit 11-like	2.23335	7.33448323668933e-18
LOC108216569	UDP-glycosyltransferase 89B2-like	2.23106	5.7601474235573e-14
[truncated: 6,938 more rows]
[truncated: 10 more columns]

## Sheet: B_M
Table 1B. Differentially expressed sequences in blackened vs border section (B_CT).
LOCUS	ANNOTATION	LOG2(FC)	padj.
LOC108203141	uncharacterized protein LOC108203141 isoform X1	9.74926	2.34263673984589e-11
LOC108214087	uncharacterized protein LOC108214087	8.74559	1.12134891085828e-09
LOC108218300	probable E3 ubiquitin-protein ligase HIP1	8.51259	5.20915340843541e-06
LOC108226654	NDR1/HIN1-like protein 12	8.49409	1.17485589567356e-05
LOC108206744	vignain-like	7.81502	2.37290775976254e-06
LOC108198859	7-deoxyloganetic acid glucosyltransferase-like	7.7951	1.60005490036339e-12
LOC108221703	wound-induced protein 1-like	7.7075	0.000184778822539831
LOC108219987	sulfate transporter 3.1	7.56173	2.55848895078151e-06
LOC108209740	pectinesterase 2	7.29431	8.00537784033906e-08
LOC108208319	dormancy-associated protein 1-like	7.23023	0.000227098686195908
LOC108226695	F-box protein PP2-B15-like	7.18315	9.69955509824578e-11
LOC108205342	putative GEM-like protein 8	6.94795	1.47847998952767e-06
LOC108220682	butyrate--CoA ligase AAE11, peroxisomal-like	6.92971	0.000181275946602677
LOC108207830	AP2-like ethylene-responsive transcription factor ANT	6.90754	3.3925431372177e-05
LOC108205397	lysine histidine transporter-like 8	6.90526	1.51189468991075e-09
LOC108193541	pleiotropic drug resistance protein 1-like	6.84156	9.13813538394415e-13
LOC108193934	probable sucrose-phosphate synthase 2	6.81833	5.29682537705664e-06
LOC108222106	glucan endo-1,3-beta-glucosidase 8-like	6.72798	1.21154267478555e-07
LOC108208603	LOB domain-containing protein 30-like	6.71965	3.41792666611478e-06
LOC108220168	uncharacterized protein LOC108220168	6.67428	1.15089055410712e-06
LOC108222503	transcription factor MYB36-like	6.42402	0.00369529221602539
LOC108217549	cation/H(+) antiporter 15-like	6.35784	0.000248697629363198
LOC108216846	cysteine-rich receptor-like protein kinase 2	6.29913	1.570334702998e-05
LOC108217665	epidermis-specific secreted glycoprotein EP1-like	6.26449	1.04445088840229e-06
LOC108198985	epidermis-specific secreted glycoprotein EP1-like	6.23743	2.63986611683795e-10
LOC108216320	basic endochitinase-like	6.19297	1.54852335406849e-08
LOC108194157	laccase-12	6.16038	1.60503229982476e-06
LOC108216473	osmotin-like protein	6.15056	5.31668630409896e-07
LOC108196269	uncharacterized protein LOC108196269	6.14713	5.56512809403115e-06
LOC108224990	cytochrome P450 78A5-like	6.11322	0.00283146961898797
LOC108212092	putative SWI/SNF-related matrix-associated actin-dependent regulator of chromatin subfamily A member 3-like 1	6.0691	5.6709069939505e-05
LOC108199168	epidermis-specific secreted glycoprotein EP1-like	6.04995	1.13739433764891e-07
LOC108198534	putative lipid phosphate phosphatase 3, chloroplastic	5.90075	0.00153153061590515
LOC108210562	haloalkane dehalogenase isoform X1	5.89072	0.00522340905909717
LOC108215740	gibberellin-regulated protein 14-like	5.87301	2.34043246319449e-07
LOC108193727	uncharacterized protein LOC108193727	5.87262	9.8807849088908e-10
LOC108198951	uncharacterized protein LOC108198951	5.77585	0.00019036936085295
LOC108227292	NAC transcription factor ONAC010-like	5.7644	0.000220836306494921
LOC108201050	uncharacterized protein LOC108201050	5.74002	0.00137524295142473
LOC108201386	uncharacterized protein LOC108201386	5.68579	1.59863870839186e-09
LOC108225446	gamma-glutamyl peptidase 5-like	5.67073	5.7299863875501e-06
LOC108198439	transcription factor bHLH92-like	5.66529	0.00055872387798336
LOC108222910	uncharacterized protein LOC108222910 isoform X1	5.62447	0.000793206136106593
108222910	uncharacterized protein LOC108222910 isoform X1	5.62447	0.000793206136106593
LOC108198740	17.8 kDa class I heat shock protein-like	5.62366	1.03764997335695e-05
LOC108207964	uncharacterized protein LOC108207964	5.60849	1.40581005813541e-08
LOC108222103	thioredoxin-like 1-2, chloroplastic	5.60109	0.00138904716389535
LOC108194980	uncharacterized protein LOC108194980	5.60002	1.43521797922224e-08
LOC108221393	glycine-rich RNA-binding protein 1-like	5.57131	0.00474585501110097
LOC108212262	uncharacterized protein LOC108212262	5.558	2.94099642521429e-08
LOC108212630	miraculin-like	5.5562	1.59563007779139e-08
LOC108197224	putative glucuronosyltransferase PGSIP8 isoform X1	5.53744	2.37103813950184e-07
108197224	putative glucuronosyltransferase PGSIP8 isoform X1	5.53744	2.37103813950184e-07
LOC108212265	uncharacterized protein LOC108212265	5.5212	0.00235571312876721
LOC108222217	F-box protein At2g26850 isoform X1	5.47988	2.12075559567909e-05
108222217	F-box protein At2g26850 isoform X1	5.47988	2.12075559567909e-05
108222217	F-box protein At2g26850 isoform X1	5.47988	2.12075559567909e-05
LOC108213199	probable aquaporin TIP3-2	5.46945	3.70982396372751e-09
LOC108221996	transcription factor RAX1-like isoform X1	5.45997	0.000181786484752704
108221996	transcription factor RAX1-like isoform X1	5.45997	0.000181786484752704
LOC108212300	uncharacterized protein LOC108212300	5.45885	4.67610494505734e-07
LOC108198731	apoptosis-inducing factor homolog B-like	5.4453	5.53306283828081e-29
LOC108202502	uncharacterized protein LOC108202502	5.41726	0.000590078364825175
LOC108225913	uncharacterized protein LOC108225913	5.41087	2.0389963852786e-07
LOC108221088	probable L-type lectin-domain containing receptor kinase S.7	5.39524	0.000158163458045659
LOC108212271	G-type lectin S-receptor-like serine/threonine-protein kinase At4g27290	5.38759	0.000695549743672432
LOC108200911	GEM-like protein 4	5.37344	0.00787085471977921
LOC108221159	midasin-like	5.35215	1.29243336943808e-07
LOC108217025	uncharacterized protein LOC108217025	5.33769	1.11271087178046e-07
LOC108195599	exocyst complex component EXO70B1	5.30477	0.00296026638378062
LOC108226697	probable protein kinase At2g41970	5.25511	0.00372417934227303
LOC108201308	uncharacterized protein LOC108201308	5.23271	1.14801261997183e-08
LOC108204955	CASP-like protein 4A4	5.23118	0.00022506189879714
LOC108216276	inactive TPR repeat-containing thioredoxin TTL3-like isoform X1	5.22319	2.16436777344627e-05
108216276	inactive TPR repeat-containing thioredoxin TTL3-like isoform X1	5.22319	2.16436777344627e-05
LOC108217421	chaperone protein DnaJ-like	5.20723	4.51256502483131e-07
LOC108215845	pyrophosphate--fructose 6-phosphate 1-phosphotransferase subunit alpha	5.19957	7.65204282402777e-05
LOC108212538	uncharacterized protein LOC108212538	5.1834	5.90807321104776e-07
LOC108200855	U-box domain-containing protein 2-like	5.13989	9.43545681889255e-17
LOC108202254	ethylene-responsive transcription factor ERF096-like	5.13643	0.000177879352653902
LOC108192852	miraculin-like	5.13466	1.32207591498944e-09
LOC108226280	uncharacterized protein LOC108226280	5.13316	0.00074303987293189
LOC108195103	phospholipase D alpha 1	5.11975	0.00617078073794094
LOC108221079	transmembrane protein 45A-like	5.09821	1.30497042431043e-13
LOC108220470	cytochrome P450 CYP72A219-like	5.09812	0.000152542579358191
LOC108221198	uncharacterized protein LOC108221198	5.08303	2.66411701401648e-06
LOC108220772	dehydration-responsive element-binding protein 1A-like	5.07548	1.20751833262167e-09
LOC108213606	miraculin-like	5.07446	6.17796196418506e-05
LOC108213246	12-oxophytodienoate reductase 2-like isoform X1	5.07439	0.00127256281598943
108213246	12-oxophytodienoate reductase 1-like isoform X1	5.07439	0.00127256281598943
LOC108195896	peptidyl-prolyl cis-trans isomerase-like isoform X1	5.06119	1.16072950142383e-06
108195896	peptidyl-prolyl cis-trans isomerase-like isoform X1	5.06119	1.16072950142383e-06
LOC108208608	ethylene-responsive transcription factor ERF098	5.05265	0.00195439326121507
LOC108225430	dehydration-responsive element-binding protein 1B-like	5.05254	0.0004556321414574
LOC108206280	uncharacterized protein LOC108206280	5.05213	1.50994367129129e-07
LOC108202426	uncharacterized protein LOC108202426	5.05208	4.13065804585998e-07
LOC108227109	miraculin-like	5.04445	2.72364678502629e-14
LOC108226826	uncharacterized protein LOC108226826	5.03483	2.37406926996381e-05
LOC108215223	G-type lectin S-receptor-like serine/threonine-protein kinase At4g27290 isoform X1	5.032	0.000583740072057923
108215223	G-type lectin S-receptor-like serine/threonine-protein kinase At4g27290 isoform X1	5.032	0.000583740072057923
LOC108225834	uncharacterized protein LOC108225834	5.01183	0.00337544475511621
LOC108220963	putative clathrin assembly protein At5g35200 isoform X1	5.00784	0.00124637001481068
108220963	putative clathrin assembly protein At5g35200 isoform X1	5.00784	0.00124637001481068
108220963	putative clathrin assembly protein At5g35200 isoform X1	5.00784	0.00124637001481068
108220963	putative clathrin assembly protein At5g35200 isoform X1	5.00784	0.00124637001481068
LOC108195232	protein PLANT CADMIUM RESISTANCE 2-like	5.00573	0.000102159544464198
LOC108213651	miraculin-like	5.00375	5.73373362737829e-06
LOC108202494	cuticle collagen 1-like	4.99192	0.00257676264022398
LOC108211159	probable indole-3-acetic acid-amido synthetase GH3.1	4.98705	2.48664293129081e-07
LOC108211160	protein STRICTOSIDINE SYNTHASE-LIKE 4-like	4.98015	5.02639526881842e-05
LOC108215768	uncharacterized protein LOC108215768	4.96448	5.80233563706059e-05
108215768	uncharacterized protein LOC108215768	4.96448	5.80233563706059e-05
LOC108206826	proline dehydrogenase 1, mitochondrial-like	4.96155	0.0017623667550987
LOC108215353	serine hydroxymethyltransferase 1, mitochondrial-like	4.95987	0.00412528642774209
LOC108208059	DNA (cytosine-5)-methyltransferase DRM2-like isoform X1	4.95871	0.00537287062268513
108208059	DNA (cytosine-5)-methyltransferase DRM2-like isoform X1	4.95871	0.00537287062268513
LOC108227975	protein BPS1, chloroplastic-like	4.95068	5.01608458088723e-12
LOC108194819	eukaryotic translation initiation factor 4G-like	4.94839	0.00197979071279131
LOC108212331	glutamate decarboxylase-like	4.93974	1.74400522824329e-05
LOC108202000	defensin-like protein 1	4.9332	1.28142911214698e-05
LOC108195148	homeobox-leucine zipper protein HOX1 isoform X1	4.92852	0.000155080979191651
108195148	homeobox-leucine zipper protein HOX1 isoform X1	4.92852	0.000155080979191651
108195148	homeobox-leucine zipper protein HOX1 isoform X1	4.92852	0.000155080979191651
LOC108217835	NAC transcription factor 25	4.91121	2.64281986621568e-06
LOC108226694	uncharacterized protein At1g28695-like isoform X1	4.9043	0.00267228767633933
108226694	uncharacterized protein At1g28695-like isoform X1	4.9043	0.00267228767633933
LOC108194325	chaperone protein DnaJ-like	4.89906	1.88646349328992e-07
LOC108226388	uncharacterized protein LOC108226388	4.88539	3.93637517459038e-06
LOC108212928	uncharacterized protein LOC108212928	4.88123	0.00640074087515098
LOC108226770	WRKY transcription factor 55	4.87445	0.000665034287642548
LOC108195236	ferritin-2, chloroplastic	4.86015	1.22624878624669e-07
LOC108220563	early nodulin-93-like	4.85095	0.00844662745634744
LOC108213518	uncharacterized protein LOC108213518	4.85086	2.34094148836835e-06
LOC108210454	uncharacterized protein LOC108210454	4.83841	3.61422324926032e-06
108210454	uncharacterized protein LOC108210454	4.83841	3.61422324926032e-06
LOC108199193	cyclic nucleotide-gated ion channel 2-like	4.83838	0.00120079813302369
LOC108221099	GDSL esterase/lipase At2g04570-like	4.82495	0.00229680871225064
LOC108198549	uncharacterized protein LOC108198549	4.82397	2.45160297278949e-06
LOC108204421	pheophytinase, chloroplastic	4.78385	0.000553756593613543
LOC108226952	F-box protein At3g07870-like	4.78207	0.000784289155959299
LOC108206399	ACT domain-containing protein ACR8-like	4.7766	1.68401084971069e-09
LOC108225973	uncharacterized protein LOC108225973	4.76079	0.00334247217542064
LOC108218453	uncharacterized protein LOC108218453	4.75955	9.27899895976837e-05
LOC108224581	mannan endo-1,4-beta-mannosidase 7-like	4.74955	0.000227404063840693
LOC108205866	ABC transporter B family member 15-like	4.74833	0.00173180632819297
LOC108200212	probable linoleate 9S-lipoxygenase 5	4.74432	0.000221669355198007
LOC108208347	non-classical arabinogalactan protein 30-like	4.74073	0.00976133769076014
LOC108194857	uncharacterized protein LOC108194857	4.73777	6.92979693445385e-05
LOC108220845	protein FAF-like, chloroplastic	4.72555	0.000660043414503614
LOC108225762	vesicle-associated protein 1-4-like	4.70672	0.000333961406410914
LOC108216848	plant cysteine oxidase 1-like isoform X1	4.7052	0.00095104937556677
108216848	plant cysteine oxidase 1-like isoform X1	4.7052	0.00095104937556677
LOC108225383	protein QUIRKY-like	4.70492	0.000740659438491969
LOC108207265	uncharacterized protein LOC108207265	4.70405	0.00102353813859246
LOC108216731	pathogenesis-related protein 5-like	4.68541	8.01935834627825e-05
LOC108222093	chitinase 2-like	4.67761	3.0870338268132e-06
LOC108222201	legumin A-like	4.67446	0.000330833933736484
LOC108207223	uncharacterized protein LOC108207223	4.67393	0.000519042492748397
LOC108220739	protein trichome birefringence-like 41	4.66953	0.00110592738875596
LOC108194127	syntaxin-related protein KNOLLE-like	4.66782	0.00116783908522308
108194127	syntaxin-related protein KNOLLE-like	4.66782	0.00116783908522308
108194127	syntaxin-related protein KNOLLE-like	4.66782	0.00116783908522308
LOC108223960	glutamate decarboxylase-like	4.66557	4.93649709222815e-05
LOC108217047	uncharacterized protein LOC108217047	4.66547	0.00788846946345405
LOC108214313	anthocyanidin 3-O-glucosyltransferase 2-like	4.65375	1.41178641206716e-05
LOC108221007	dehydration-responsive element-binding protein 1A-like	4.65229	1.69140982834464e-10
LOC108202217	probable receptor-like protein kinase At3g17420 isoform X1	4.65048	0.00192832732998021
108202217	serine/threonine-protein kinase CDG1-like isoform X1	4.65048	0.00192832732998021
LOC108222202	uncharacterized protein LOC108222202	4.63453	0.00073166805715979
LOC108222101	UDP-N-acetylglucosamine--dolichyl-phosphate N-acetylglucosaminephosphotransferase-like isoform X1	4.63315	0.00042244033150703
108222101	UDP-N-acetylglucosamine--dolichyl-phosphate N-acetylglucosaminephosphotransferase-like isoform X1	4.63315	0.00042244033150703
LOC108195624	lichenase-like	4.63236	0.00783733850798431
LOC108207011	probable LRR receptor-like serine/threonine-protein kinase At2g24230	4.62474	0.00851422776557752
LOC108195496	uncharacterized protein LOC108195496	4.58754	0.000189360923866673
LOC108226063	probable LRR receptor-like serine/threonine-protein kinase At1g67720	4.57891	3.43511136841621e-05
LOC108193355	F-box/kelch-repeat protein At1g15670-like	4.55391	2.93155862440525e-05
LOC108197673	ethylene-responsive transcription factor ERF061	4.54073	0.000509836394105601
LOC108201888	ethylene-responsive transcription factor ERF109-like	4.51046	2.99615943444697e-17
LOC108194529	brefeldin A-inhibited guanine nucleotide-exchange protein 5-like	4.50812	8.55100655297746e-05
LOC108217197	uncharacterized protein LOC108217197	4.50749	2.8782348207389e-05
LOC108199884	LOB domain-containing protein 22-like	4.49245	0.000934507078199118
LOC108202153	F-box/FBD/LRR-repeat protein At1g13570-like isoform X1	4.49033	0.00989702123186215
108202153	F-box/FBD/LRR-repeat protein At1g13570-like isoform X1	4.49033	0.00989702123186215
LOC108211240	long chain acyl-CoA synthetase 1	4.48506	0.000447321584252602
108211240	long chain acyl-CoA synthetase 1	4.48506	0.000447321584252602
108211240	long chain acyl-CoA synthetase 1	4.48506	0.000447321584252602
LOC108211826	probable indole-3-acetic acid-amido synthetase GH3.1	4.46857	0.00720938768623754
LOC108226221	uncharacterized protein LOC108226221	4.45905	9.8424214982747e-06
LOC108221233	vacuolar iron transporter homolog 2-like	4.45816	0.00322124573505048
LOC108219464	UDP-arabinose 4-epimerase 1-like	4.45094	0.000845054306955621
108219464	UDP-arabinose 4-epimerase 1-like	4.45094	0.000845054306955621
108219464	UDP-arabinose 4-epimerase 1-like	4.45094	0.000845054306955621
LOC108214136	alcohol dehydrogenase 1-like	4.44332	0.00307907626911782
NA	NA	4.44246	0.0031065294234996
LOC108198918	probable sodium-coupled neutral amino acid transporter 6	4.43717	0.00853206519559614
LOC108225521	probable galacturonosyltransferase 12	4.43205	0.000244915548732182
LOC108220919	uncharacterized protein LOC108220919	4.43155	0.000118593084728075
LOC108217621	RING-H2 finger protein ATL56-like isoform X1	4.42204	0.000509836394105601
108217621	RING-H2 finger protein ATL56-like isoform X1	4.42204	0.000509836394105601
LOC108220857	AP2-like ethylene-responsive transcription factor At1g16060	4.41086	0.000873544212995075
LOC108211898	ribulose bisphosphate carboxylase/oxygenase activase 2, chloroplastic-like	4.40838	0.00027198395316459
LOC108225771	ethylene-responsive transcription factor ERF109-like	4.39397	1.99173293156774e-07
LOC108207738	protein NRT1/ PTR FAMILY 1.1-like	4.37362	0.000759848132029382
LOC108225485	sterol 4-C-methyltransferase strm-1-like	4.37331	0.000122143292352938
LOC108194970	patatin-like protein 2	4.36975	1.71045091763184e-06
LOC108203015	serine carboxypeptidase-like 40	4.36522	0.0020425630007139
LOC108220902	cytochrome P450 71A9-like	4.36168	0.00143629928019712
LOC108217967	probable F-box protein At1g60180	4.34185	0.00606507942335256
LOC108194018	BTB/POZ domain-containing protein At1g50280	4.33015	0.00058292628176956
LOC108227252	sugar transporter ERD6-like 3 isoform X1	4.28904	0.00735203130937618
108227252	sugar transporter ERD6-like 3 isoform X1	4.28904	0.00735203130937618
108227252	sugar transporter ERD6-like 3 isoform X1	4.28904	0.00735203130937618
108227252	sugar transporter ERD6-like 3 isoform X1	4.28904	0.00735203130937618
108227252	sugar transporter ERD6-like 3 isoform X1	4.28904	0.00735203130937618
LOC108217674	pathogenesis-related protein PR-4-like	4.28591	0.00012700592016979
LOC108225089	cysteine protease RD19A	4.27349	0.00081608100929826
LOC108225742	F-box/WD repeat-containing protein 7	4.27252	6.67740718546475e-09
LOC108211564	thaumatin-like protein	4.2708	0.00780820796096918
LOC108219919	uncharacterized protein LOC108219919	4.26699	0.00155770381285953
LOC108217728	laccase-14-like	4.26052	0.000186954743640215
LOC108228062	sphinganine C4-monooxygenase 1-like	4.25673	0.00100038752934078
LOC108227284	dehydration-responsive element-binding protein 1B-like	4.25506	5.31668630409896e-07
LOC108211186	nudix hydrolase 17, mitochondrial-like	4.24815	8.10846682948903e-05
LOC108211201	protein DETOXIFICATION 43-like isoform X1	4.23617	0.00124394431152564
108211201	protein DETOXIFICATION 43-like isoform X1	4.23617	0.00124394431152564
108211201	protein DETOXIFICATION 43-like isoform X1	4.23617	0.00124394431152564
108211201	protein DETOXIFICATION 43-like isoform X1	4.23617	0.00124394431152564
108211201	protein DETOXIFICATION 43-like isoform X1	4.23617	0.00124394431152564
108211201	protein DETOXIFICATION 43-like isoform X1	4.23617	0.00124394431152564
108211201	protein DETOXIFICATION 43-like isoform X1	4.23617	0.00124394431152564
LOC108219380	nuclear speckle RNA-binding protein B-like	4.23505	0.00801549114286827
LOC108204811	purple acid phosphatase 3-like	4.22429	0.00426858486967824
LOC108217800	glutaredoxin-C9-like	4.22384	0.00206167233241419
LOC108211550	dehydration-responsive element-binding protein 2A-like	4.20521	5.29682537705664e-06
LOC108224441	early nodulin-75-like	4.20474	8.75587282489102e-06
LOC108201180	UPF0481 protein At3g47200-like	4.20196	0.00551113011405263
LOC108211797	type IV inositol polyphosphate 5-phosphatase 3-like isoform X1	4.198	0.00112449277461677
108211797	type IV inositol polyphosphate 5-phosphatase 3-like isoform X1	4.198	0.00112449277461677
108211797	type IV inositol polyphosphate 5-phosphatase 3-like isoform X1	4.198	0.00112449277461677
LOC108225471	uncharacterized protein LOC108225471	4.19666	2.72844299116748e-09
LOC108221085	transport and Golgi organization 2 homolog	4.18513	7.89037242627492e-05
LOC108225474	CST complex subunit STN1	4.18383	0.00594648855522254
LOC108207811	tetrahydrocannabinolic acid synthase-like	4.18254	0.000101966269758563
LOC108216527	probable prolyl 4-hydroxylase 6	4.17362	0.00227671029063911
LOC108222049	eukaryotic translation initiation factor 5A-2-like	4.17071	0.00804490056427985
LOC108217611	LOW QUALITY PROTEIN: xyloglucan endotransglucosylase/hydrolase protein 15-like	4.17003	0.00828337515751206
LOC108217998	protein WEAK CHLOROPLAST MOVEMENT UNDER BLUE LIGHT 1	4.16398	0.000654578459275733
LOC108223109	uncharacterized protein LOC108223109	4.16198	5.2313770222949e-06
LOC108209081	CASP-like protein 1F1	4.16103	0.000857953990373758
LOC108198916	elicitor-responsive protein 1-like	4.16077	0.00254374328265062
LOC108206508	uncharacterized protein LOC108206508	4.15873	3.7905449669455e-07
LOC108195419	leucine-rich repeat extensin-like protein 4	4.15214	0.00165645305663801
LOC108206590	uncharacterized protein LOC108206590	4.15009	1.43051512551417e-07
LOC108215800	cinnamoyl-CoA reductase 2-like isoform X1	4.14575	0.000234907825649399
108215800	cinnamoyl-CoA reductase 2-like isoform X1	4.14575	0.000234907825649399
LOC108206049	protein LE25-like	4.14375	0.000287755552766147
LOC108226518	uncharacterized protein LOC108226518	4.11345	3.78819278424209e-05
LOC108210774	miraculin-like	4.11231	2.56717028309224e-05
LOC108220233	chaperone protein dnaJ 8, chloroplastic-like	4.10672	1.83473065538937e-06
LOC108223066	chaperone protein dnaJ 8, chloroplastic-like	4.10672	1.83473065538937e-06
LOC108207212	protein FAR1-RELATED SEQUENCE 5-like	4.09959	0.000466982748234159
LOC108194042	F-box protein SKIP28	4.09666	4.71223914638153e-06
LOC108211837	interferon-related developmental regulator 1-like isoform X1	4.09429	0.000796921984517165
108211837	interferon-related developmental regulator 1-like isoform X1	4.09429	0.000796921984517165
108211837	interferon-related developmental regulator 1-like isoform X1	4.09429	0.000796921984517165
108211837	interferon-related developmental regulator 1-like isoform X1	4.09429	0.000796921984517165
LOC108218645	uncharacterized protein LOC108218645	4.0869	1.51124495146679e-05
LOC108222010	ethylene-responsive transcription factor TINY-like	4.07785	0.000161534570234639
LOC108224553	G2/mitotic-specific cyclin S13-7-like isoform X1	4.07332	1.1150129578049e-06
108224553	G2/mitotic-specific cyclin S13-7-like isoform X1	4.07332	1.1150129578049e-06
108224553	G2/mitotic-specific cyclin S13-7-like isoform X1	4.07332	1.1150129578049e-06
108224553	G2/mitotic-specific cyclin S13-7-like isoform X1	4.07332	1.1150129578049e-06
LOC108208484	uncharacterized protein LOC108208484	4.06474	0.00213980201600857
LOC108210273	21 kDa protein-like	4.06444	0.00242865810729389
LOC108220625	dihydroflavonol-4-reductase-like	4.05696	0.00746267465305288
LOC108193699	basic 7S globulin 2-like	4.05503	0.000389439726722907
LOC108214327	diacylglycerol kinase 5-like isoform X1	4.05467	0.000118196891237741
108214327	diacylglycerol kinase 5-like isoform X1	4.05467	0.000118196891237741
108214327	diacylglycerol kinase 5-like isoform X1	4.05467	0.000118196891237741
108214327	diacylglycerol kinase 5-like isoform X1	4.05467	0.000118196891237741
LOC108208143	sterol 3-beta-glucosyltransferase UGT80A2-like	4.05355	9.30379901952083e-05
LOC108193525	probable inactive poly	4.04779	1.73700315027485e-05
LOC108222038	auxin-responsive protein IAA1-like	4.0404	0.000135198587917322
LOC108224914	CSC1-like protein At3g21620	4.03984	0.000448732201562052
108224914	CSC1-like protein At3g21620	4.03984	0.000448732201562052
LOC108225947	basic 7S globulin-like	4.03772	0.00176707805786177
LOC108195944	probable BOI-related E3 ubiquitin-protein ligase 2	4.03638	0.00167514624910128
LOC108225900	basic 7S globulin-like	4.03237	0.00490781599161931
LOC108208704	uncharacterized protein LOC108208704	4.01924	0.00042317556745582
LOC108214192	aluminum-activated malate transporter 9-like	4.0174	0.00122617176580813
LOC108213512	miraculin-like	4.01348	7.63887330800363e-05
LOC108196309	protein YLS3	4.01116	0.000296244636956386
LOC108194438	uncharacterized protein LOC108194438	4.00533	0.00154269860354824
LOC108194714	basic 7S globulin 2-like	4.00492	0.00056979343319307
LOC108211632	1-aminocyclopropane-1-carboxylate synthase 3	3.99951	2.40941338456865e-14
LOC108225445	acylsugar acyltransferase 3-like	3.99852	6.56323198542568e-08
LOC108198402	pathogenesis-related protein P2-like	3.99435	0.00221095745193554
LOC108212067	uncharacterized protein LOC108212067	3.98821	1.68125724090936e-06
LOC108197915	probable phospholipid hydroperoxide glutathione peroxidase	3.98724	5.01608458088723e-12
LOC108216333	G-type lectin S-receptor-like serine/threonine-protein kinase At5g35370	3.98514	0.00508554376244139
LOC108215792	probable prolyl 4-hydroxylase 7	3.98477	0.000519042492748397
LOC108211673	type I inositol polyphosphate 5-phosphatase 4-like	3.9825	0.00520769129899443
LOC108228040	bifunctional riboflavin biosynthesis protein RIBA 1, chloroplastic-like	3.98112	2.01449802118151e-05
LOC108211425	probable trehalose-phosphate phosphatase H	3.98105	0.000333957376154717
LOC108193001	growth-regulating factor 3-like	3.98015	0.000655530326891949
LOC108202229	uncharacterized protein LOC108202229	3.97921	0.000197335354230574
LOC108212408	uncharacterized protein LOC108212408	3.9623	0.00608538898377878
LOC108200215	tetrahydrocannabinolic acid synthase-like	3.96005	0.000603326554664029
LOC108212168	chaperone protein dnaJ 11, chloroplastic-like	3.94033	3.66946179079747e-09
LOC108222345	ethylene-responsive transcription factor ERF027-like	3.93853	0.000618453314054048
LOC108226821	phosphatidylinositol 4-phosphate 5-kinase 4	3.9238	0.00434603123881915
LOC108196452	diacylglycerol kinase theta-like	3.9136	3.18450189567655e-15
LOC108220270	putative protein TPRXL	3.91127	3.82369540168383e-05
LOC108224554	uncharacterized protein LOC108224554	3.91054	0.000175825019043284
LOC108204441	gamma-glutamyltranspeptidase 1-like isoform X1	3.89458	1.35058849678509e-05
108204441	gamma-glutamyltranspeptidase 1-like isoform X1	3.89458	1.35058849678509e-05
108204441	gamma-glutamyltranspeptidase 1-like isoform X1	3.89458	1.35058849678509e-05
LOC108207929	kinesin-like protein KIN-7F	3.88627	0.00789520299952925
108207929	kinesin-like protein KIN-7F	3.88627	0.00789520299952925
108207929	kinesin-like protein KIN-7F	3.88627	0.00789520299952925
108207929	kinesin-like protein KIN-7F	3.88627	0.00789520299952925
108207929	kinesin-like protein KIN-7F	3.88627	0.00789520299952925
108207929	kinesin-like protein KIN-7F	3.88627	0.00789520299952925
108207929	kinesin-like protein KIN-7F	3.88627	0.00789520299952925
108207929	kinesin-like protein KIN-7F	3.88627	0.00789520299952925
108207929	kinesin-like protein KIN-7F	3.88627	0.00789520299952925
108207929	kinesin-like protein KIN-7F	3.88627	0.00789520299952925
LOC108198703	uncharacterized protein LOC108198703	3.88608	0.000268353594721351
LOC108220130	cytochrome P450 CYP72A219-like	3.86896	0.00120099039500342
LOC108210999	aspartic proteinase nepenthesin-1-like	3.86419	0.00020862013861286
LOC108213754	peroxidase 5-like	3.8587	0.000439715668465452
LOC108195321	basic 7S globulin-like	3.85804	0.00522289166921126
LOC108199950	uncharacterized protein LOC108199950	3.85751	0.000805395154283805
LOC108211554	miraculin-like	3.85535	0.000230303790863661
LOC108214835	probable cysteine desulfurase isoform X1	3.85501	0.00051726403024588
108214835	probable cysteine desulfurase isoform X1	3.85501	0.00051726403024588
LOC108216924	ATP-dependent DNA helicase RRM3-like	3.84566	0.0074321266307865
LOC108208323	uncharacterized protein LOC108208323	3.84459	0.000101559305843162
LOC108219764	protein TORNADO 1	3.83941	0.00608538898377878
LOC108217473	epidermis-specific secreted glycoprotein EP1-like	3.83148	0.000160173359594784
LOC108201284	uncharacterized protein LOC108201284	3.8237	0.00022033505202083
LOC108207915	inorganic pyrophosphatase 1	3.8087	0.000244062494282616
LOC108213116	probable trehalose-phosphate phosphatase J	3.80858	0.00385872458871972
LOC108194917	uncharacterized protein LOC108194917	3.80454	0.00070711589048631
LOC108216004	transcription factor bHLH130	3.79232	1.20709103964595e-05
LOC108217391	cinnamoyl-CoA reductase 1-like	3.79181	5.380788729137e-05
LOC108202563	stem-specific protein TSJT1-like	3.78807	0.000538884379023269
LOC108219875	P-loop NTPase domain-containing protein LPA1 homolog 2	3.77551	1.11000183136698e-05
LOC108221986	chaperone protein dnaJ 11, chloroplastic-like	3.77343	7.23098919637063e-07
LOC108193788	protein ECERIFERUM 26-like	3.77119	6.2370073337011e-06
LOC108211553	alkane hydroxylase MAH1-like	3.76893	0.00466774419672585
LOC108194871	protein NIM1-INTERACTING 1	3.76892	0.000393073762056122
LOC108206511	B3 domain-containing protein Os03g0120900-like	3.76795	0.00281209709806917
108206511	B3 domain-containing protein Os03g0120900-like	3.76795	0.00281209709806917
108206511	B3 domain-containing protein Os03g0120900-like	3.76795	0.00281209709806917
108206511	B3 domain-containing protein Os03g0120900-like	3.76795	0.00281209709806917
LOC108196094	metal transporter Nramp1	3.7627	0.000170563453312598
108196094	metal transporter Nramp1	3.7627	0.000170563453312598
LOC108219750	thioredoxin reductase 1	3.75765	1.04272606545933e-09
LOC108194272	heparanase-like protein 2 isoform X1	3.75571	0.00154804254852215
108194272	heparanase-like protein 2 isoform X1	3.75571	0.00154804254852215
LOC108210615	probable isoaspartyl peptidase/L-asparaginase 2	3.75402	2.69202919339007e-08
LOC108218171	histidine kinase CKI1-like	3.75172	0.00422181103405182
LOC108193659	uncharacterized protein LOC108193659	3.74227	0.00113838344163831
LOC108228160	EPIDERMAL PATTERNING FACTOR-like protein 2	3.73985	0.00256016796859243
LOC108194664	uncharacterized protein LOC108194664	3.73292	0.00655361711548059
LOC108205248	phosphoribulokinase, chloroplastic-like	3.73058	0.00017665127074468
LOC108217812	eukaryotic translation initiation factor 3 subunit A-like	3.72988	4.69787181050276e-06
LOC108194632	peroxidase 60-like	3.72909	3.00788042185479e-05
LOC108224825	histone H1	3.72646	2.50112465226514e-08
LOC108198839	uncharacterized protein LOC108198839	3.72611	0.00113065711189404
LOC108206761	exocyst complex component EXO70A1-like	3.72605	8.85576622595464e-16
NA	NA	3.72284	9.14746795087754e-05
LOC108225232	cytochrome b561 domain-containing protein At4g18260-like	3.72202	0.00730184072850486
NA	NA	3.72051	9.14353363311269e-05
LOC108212503	transcription factor MYB113-like	3.72026	0.00267228767633933
LOC108196428	sucrose synthase-like	3.72004	0.00265145425379923
108196428	sucrose synthase-like	3.72004	0.00265145425379923
108196428	sucrose synthase-like	3.72004	0.00265145425379923
LOC108193673	DNA topoisomerase 1-like	3.7157	0.00556731173862163
108193673	DNA topoisomerase 1-like	3.7157	0.00556731173862163
LOC108198027	methyltransferase-like protein 13	3.70984	0.0076254901709038
LOC108195220	glutathione S-transferase U17-like	3.70564	2.68241583782322e-07
LOC108213809	uncharacterized protein LOC108213809	3.70556	0.000219508427916062
LOC108206589	protein IQ-DOMAIN 14	3.70023	0.00361531039604265
108206589	protein IQ-DOMAIN 14	3.70023	0.00361531039604265
108206589	protein IQ-DOMAIN 14	3.70023	0.00361531039604265
108206589	protein IQ-DOMAIN 14	3.70023	0.00361531039604265
LOC108222433	BAG family molecular chaperone regulator 2-like	3.69986	0.00107867957289767
LOC108221049	coatomer subunit beta\\'-3-like	3.69827	2.15423159431062e-05
LOC108199296	sucrose synthase isoform X1	3.69631	0.000720498134458731
108199296	sucrose synthase isoform X1	3.69631	0.000720498134458731
108199296	sucrose synthase isoform X1	3.69631	0.000720498134458731
LOC108202809	squalene monooxygenase-like	3.69277	0.00941194691094524
LOC108211606	3-hydroxy-3-methylglutaryl-coenzyme A reductase 1-like	3.69139	0.000833491237403422
LOC108222267	protein trichome birefringence-like 31	3.68403	2.1527255553728e-07
LOC108226358	tetrahydrocannabinolic acid synthase-like	3.68005	2.49965063074675e-06
LOC108224887	probable galacturonosyltransferase 15	3.67189	1.87204312123307e-06
LOC108194215	inorganic pyrophosphatase 2-like	3.66206	0.00118747737455311
LOC108222397	E3 ubiquitin-protein ligase RNF181-like	3.65862	0.00734717146056685
LOC108220409	uncharacterized protein LOC108220409	3.64694	7.73687292991472e-06
LOC108208154	protein TIFY 5A-like	3.64266	7.83734359735191e-22
LOC108217953	aldehyde oxidase GLOX-like	3.63288	0.00279826781147345
LOC108198563	MADS-box transcription factor 23-like	3.63028	4.03221469932984e-05
LOC108202765	mannitol dehydrogenase-like	3.62436	0.000233398952146935
LOC108207010	F-box protein PP2-A12	3.61671	0.00022033505202083
LOC108227400	probable galactinol--sucrose galactosyltransferase 2	3.60896	0.000105343968846378
LOC108224775	homeobox-leucine zipper protein HAT22-like	3.6023	0.000634948711478161
LOC108213506	auxin-responsive protein SAUR36-like	3.60217	0.000958329074308194
LOC108210056	protein DETOXIFICATION 49-like	3.5981	1.02555879517329e-12
LOC108226933	probable WRKY transcription factor 45	3.59802	0.000379366366861685
LOC108225909	uncharacterized protein LOC108225909	3.59762	0.00222811371887257
LOC108195342	pectate lyase-like	3.58896	0.00120037634879479
LOC108206052	phosphoenolpyruvate carboxylase kinase 2-like	3.58128	7.10640018976976e-05
LOC108226515	probable rhamnogalacturonate lyase B isoform X1	3.57708	0.00452719945428086
108226515	probable rhamnogalacturonate lyase B isoform X1	3.57708	0.00452719945428086
LOC108209732	pyruvate decarboxylase 1	3.57008	0.00314285784341336
LOC108219759	phosphoglycerate kinase, cytosolic-like	3.54486	0.000159831863851316
108219759	phosphoglycerate kinase, cytosolic-like	3.54486	0.000159831863851316
LOC108209091	uncharacterized protein LOC108209091	3.53923	1.60503229982476e-06
108209091	uncharacterized protein LOC108209091	3.53923	1.60503229982476e-06
108209091	uncharacterized protein LOC108209091	3.53923	1.60503229982476e-06
108209091	uncharacterized protein LOC108209091	3.53923	1.60503229982476e-06
108209091	uncharacterized protein LOC108209091	3.53923	1.60503229982476e-06
108209091	uncharacterized protein LOC108209091	3.53923	1.60503229982476e-06
108209091	uncharacterized protein LOC108209091	3.53923	1.60503229982476e-06
108209091	uncharacterized protein LOC108209091	3.53923	1.60503229982476e-06
LOC108225983	protein BPS1, chloroplastic-like	3.52678	1.22928239771824e-10
LOC108193207	protein CDI-like	3.52012	0.00366483852030038
LOC108204526	uncharacterized protein LOC108204526	3.52003	2.16585699959646e-07
LOC108208164	uncharacterized protein LOC108208164	3.51605	0.00412700620322207
LOC108223820	clathrin coat assembly protein AP180	3.5082	0.00372727989999256
LOC108217198	serine-aspartate repeat-containing protein I-like	3.4965	1.62906555156576e-07
LOC108197195	ubiquinol oxidase 2, mitochondrial-like	3.4826	5.73661237958601e-06
LOC108222408	sucrose synthase 2-like	3.47452	0.000750832853151918
LOC108200627	uncharacterized protein YwkD	3.47397	9.57554688349804e-11
LOC108206820	ACD11 homolog protein	3.47347	1.645026419458e-09
LOC108211364	serine carboxypeptidase-like 42	3.47138	6.54974606034572e-05
LOC108227734	uncharacterized protein LOC108227734 isoform X1	3.46649	0.00133323118960567
108227734	uncharacterized protein LOC108227734 isoform X1	3.46649	0.00133323118960567
LOC108201408	protein FAR1-RELATED SEQUENCE 1-like	3.44031	0.000362312923694214
LOC108207446	glucan endo-1,3-beta-glucosidase 8-like	3.4394	0.00167467804405337
LOC108196692	probable pectinesterase/pectinesterase inhibitor 17	3.43785	3.84182748595285e-07
LOC108206585	BOI-related E3 ubiquitin-protein ligase 1-like	3.43743	0.00135792541470934
LOC108221924	protein DETOXIFICATION 49	3.43182	0.00276344643172464
LOC108197851	transcription factor MYB108-like	3.42694	2.39505745302746e-06
LOC108209084	NADP-dependent malic enzyme, chloroplastic-like	3.4245	0.0020588003751667
LOC108225773	uncharacterized protein LOC108225773	3.41718	0.00203550313570817
LOC108207222	TMV resistance protein N-like	3.41427	0.00493010619556323
LOC108193848	serine/threonine-protein kinase At5g01020	3.4134	0.00737322792263648
LOC108192845	protoporphyrinogen oxidase, mitochondrial isoform X1	3.41339	0.00125314480564052
108192845	protoporphyrinogen oxidase, mitochondrial isoform X1	3.41339	0.00125314480564052
LOC108205797	zinc finger protein CONSTANS-LIKE 2-like	3.41246	0.00595454757054779
LOC108205835	zinc finger protein CONSTANS-LIKE 2-like	3.41246	0.00595454757054779
LOC108201857	serine/threonine-protein kinase HT1-like	3.40586	0.000526827317038192
108201857	serine/threonine-protein kinase HT1-like	3.40586	0.000526827317038192
LOC108225340	uncharacterized protein LOC108225340	3.40142	2.32319510395873e-08
LOC108217899	uncharacterized protein LOC108217899 isoform X1	3.39317	0.000534378376489354
108217899	uncharacterized protein LOC108217899 isoform X1	3.39317	0.000534378376489354
LOC108204312	putative protein phosphatase 2C-like protein 44	3.38637	0.00174234255107364
LOC108197767	7-deoxyloganetic acid glucosyltransferase-like	3.38406	0.00260363135781188
LOC108222920	F-box/kelch-repeat protein At3g23880-like isoform X1	3.38396	0.00117399360880775
108222920	F-box/kelch-repeat protein At3g23880-like isoform X1	3.38396	0.00117399360880775
108222920	F-box/kelch-repeat protein At3g23880-like isoform X1	3.38396	0.00117399360880775
108222920	F-box/kelch-repeat protein At3g23880-like isoform X1	3.38396	0.00117399360880775
LOC108217870	oleosin 18.2 kDa-like	3.38098	0.000822168623670572
LOC108220554	uncharacterized protein At5g48480-like	3.37995	5.29663782772446e-05
LOC108217912	F-box/FBD/LRR-repeat protein At1g13570-like	3.376	0.0032118943365967
LOC108212620	uncharacterized protein LOC108212620	3.36996	0.00898075531669998
LOC108222896	chalcone synthase 1-like	3.36688	0.000765795990190015
LOC108222897	chalcone synthase 1-like	3.36653	0.000762134595948136
LOC108213123	fatty acyl-CoA reductase 2-like	3.36058	0.00125156051509111
LOC108209680	ABC transporter G family member 24-like	3.34281	3.77254970431983e-05
LOC108198355	uncharacterized protein LOC108198355	3.33963	0.00122461282789508
LOC108197206	probable protein phosphatase 2C 40	3.33865	0.00193001221087184
108197206	probable protein phosphatase 2C 40	3.33865	0.00193001221087184
LOC108194860	probable carboxylesterase 8	3.33615	0.0094712408568534
LOC108200042	homogentisate phytyltransferase 1, chloroplastic-like isoform X1	3.33502	0.00192903439184817
108200042	homogentisate phytyltransferase 1, chloroplastic-like isoform X1	3.33502	0.00192903439184817
LOC108215315	uncharacterized calcium-binding protein At1g02270	3.33357	0.00219613229663181
LOC108206338	bZIP transcription factor 53	3.33268	0.000650828169336224
LOC108210486	agamous-like MADS-box protein AGL8 homolog isoform X1	3.32937	6.03420777942219e-05
108210486	truncated transcription factor CAULIFLOWER A isoform X1	3.32937	6.03420777942219e-05
108210486	truncated transcription factor CAULIFLOWER A isoform X1	3.32937	6.03420777942219e-05
108210486	agamous-like MADS-box protein AGL8 homolog isoform X1	3.32937	6.03420777942219e-05
LOC108212074	uncharacterized protein LOC108212074 isoform X1	3.32675	6.98237837933212e-05
108212074	uncharacterized protein LOC108212074 isoform X1	3.32675	6.98237837933212e-05
108212074	uncharacterized protein LOC108212074 isoform X1	3.32675	6.98237837933212e-05
108212074	uncharacterized protein LOC108212074 isoform X1	3.32675	6.98237837933212e-05
LOC108219404	cytochrome P450 71D9-like	3.32437	0.00372586769488765
LOC108222865	uncharacterized protein LOC108222865	3.31599	3.10657977549844e-05
108222865	uncharacterized protein LOC108222865	3.31599	3.10657977549844e-05
108222865	uncharacterized protein LOC108222865	3.31599	3.10657977549844e-05
108222865	uncharacterized protein LOC108222865	3.31599	3.10657977549844e-05
108222865	uncharacterized protein LOC108222865	3.31599	3.10657977549844e-05
LOC108225119	putative HVA22-like protein g isoform X1	3.31268	0.00293916550974599
108225119	HVA22-like protein j isoform X1	3.31268	0.00293916550974599
108225119	putative HVA22-like protein g isoform X1	3.31268	0.00293916550974599
LOC108226194	piriformospora indica-insensitive protein 2-like	3.30444	0.00593995148750828
LOC108221051	L-ascorbate peroxidase, cytosolic-like	3.29628	0.00566817795567032
LOC108194567	dof zinc finger protein DOF1.5	3.29306	0.00041276002852198
LOC108193279	high mobility group B protein 2-like isoform X1	3.28995	0.000930920312982341
108193279	high mobility group B protein 3-like isoform X1	3.28995	0.000930920312982341
108193279	high mobility group B protein 3-like isoform X1	3.28995	0.000930920312982341
108193279	HMG1/2-like protein isoform X1	3.28995	0.000930920312982341
108193279	high mobility group B protein 2-like isoform X1	3.28995	0.000930920312982341
LOC108202540	histone-lysine N-methyltransferase ATX1-like	3.28963	0.00400202631705898
LOC108224633	oxygen-evolving enhancer protein 1, chloroplastic	3.28821	0.00105207859974973
LOC108220828	uncharacterized endoplasmic reticulum membrane protein YGL010W	3.2872	0.00642132913153551
LOC108211049	putative lipase ROG1 isoform X1	3.28696	0.00124193474678378
108211049	putative lipase ROG1 isoform X1	3.28696	0.00124193474678378
NA	NA	3.28471	0.000854836113868454
NA	NA	3.2834	0.000857953990373758
LOC108222113	glucan endo-1,3-beta-glucosidase, acidic-like	3.28077	0.00622530928662339
LOC108224901	putative aminoacrylate hydrolase RutD	3.2765	0.00104497144673509
LOC108211448	small heat shock protein, chloroplastic	3.27339	0.000223391563671072
LOC108225423	ethylene-responsive transcription factor ERF025-like	3.27224	2.59603362934231e-05
LOC108207786	ethylene-responsive transcription factor 8-like	3.27129	0.00033281028631328
LOC108227220	sphingoid long-chain bases kinase 1-like	3.26366	0.00752283883526891
108227220	sphingoid long-chain bases kinase 1-like	3.26366	0.00752283883526891
LOC108228159	putative lipase ROG1 isoform X1	3.25976	0.00628515436736294
108228159	putative lipase ROG1 isoform X1	3.25976	0.00628515436736294
LOC108195046	lysine-specific demethylase REF6-like	3.25785	0.00403345552215118
LOC108217472	epidermis-specific secreted glycoprotein EP1-like	3.2551	0.00192903439184817
LOC108198646	transcription factor bHLH92-like	3.24413	0.00384648098021026
LOC108215136	inactive protein kinase SELMODRAFT_444075-like	3.24292	0.00141724676386546
LOC108220485	ras-related protein RABC2a-like isoform X1	3.23947	0.00353473068983803
108220485	ras-related protein RABC2a-like isoform X1	3.23947	0.00353473068983803
LOC108215748	pyrophosphate--fructose 6-phosphate 1-phosphotransferase subunit beta-like	3.23928	0.00189332383125875
LOC108207752	chaperone protein dnaJ 20, chloroplastic-like	3.22334	3.78519446547004e-17
LOC108213348	uncharacterized protein LOC108213348	3.2215	0.002202128612703
LOC108222843	neutral ceramidase-like	3.22025	9.28281245700582e-05
LOC108221710	probable leucine-rich repeat receptor-like protein kinase At1g35710	3.2169	0.00405826834784659
LOC108210724	uncharacterized protein LOC108210724	3.21577	1.4548913788162e-11
LOC108215691	serine/threonine-protein kinase-like protein CCR4	3.21464	4.56426185937279e-08
LOC108199816	alcohol dehydrogenase 1	3.21337	0.00285154394329008
LOC108195409	phosphate transporter PHO1 homolog 3-like	3.20191	1.05571934662438e-05
LOC108208741	F-box protein PP2-A12-like	3.19557	0.000110460558676549
LOC108204748	extra-large guanine nucleotide-binding protein 1-like	3.19282	0.00106840770403521
LOC108195196	uncharacterized protein LOC108195196	3.19206	3.82526863759105e-06
LOC108209420	alpha,alpha-trehalose-phosphate synthase	3.18994	0.00373594968816721
LOC108195779	glycine-rich domain-containing protein 1-like isoform X1	3.18853	7.08725478812423e-07
LOC108194576	uncharacterized protein LOC108194576	3.18496	0.00440187163270434
LOC108194537	uncharacterized protein LOC108194537	3.18432	0.000900653185195251
LOC108213265	miraculin-like	3.18108	0.000568406081328955
LOC108215069	protein EMBRYO SAC DEVELOPMENT ARREST 3, chloroplastic	3.17944	0.00332317573085229
LOC108225792	CCG-binding protein 1	3.17869	0.000441805325519357
LOC108227471	2-deoxy-glucose resistant protein 2	3.17245	0.00475840888638072
LOC108213804	probable E3 ubiquitin-protein ligase ARI5	3.17042	0.00161282066529061
LOC108227865	UDP-glycosyltransferase 76G1-like isoform X1	3.16729	0.00260786139375224
LOC108222312	putative MO25-like protein At5g47540	3.16614	8.90257506348202e-07
LOC108208620	putative receptor-like protein kinase At4g00960	3.15183	1.54739615786212e-05
LOC108194269	F-box protein At2g02240-like	3.14833	0.00403942640724775
LOC108203397	ATP-dependent 6-phosphofructokinase 3-like	3.14482	0.00151980733283393
LOC108214446	gibberellin receptor GID1C-like	3.14455	0.00119394480765771
LOC108224587	NAC domain-containing protein 72-like	3.14342	6.75875874219856e-05
LOC108220429	plastidic glucose transporter 4-like	3.13599	3.18941154182723e-08
LOC108198156	transcription initiation factor TFIID subunit 4-like	3.13277	0.00228197387522196
LOC108222898	chalcone synthase 2-like	3.12759	0.00254590812898082
LOC108222808	AP2/ERF and B3 domain-containing transcription factor At1g51120-like	3.12744	8.29644306687668e-05
LOC108197980	protein TRANSPORT INHIBITOR RESPONSE 1-like	3.12576	0.000571821462831307
LOC108216137	dnaJ protein ERDJ3A	3.12329	0.00677625235995015
LOC108213201	uncharacterized protein LOC108213201	3.1213	0.0033351829145177
LOC108209470	jacalin-related lectin 19	3.11805	0.00433255832808179
LOC108197038	zinc finger CCCH domain-containing protein 20	3.11621	8.60477358294478e-06
LOC108220104	uncharacterized protein LOC108220104 isoform X1	3.11606	0.000509836394105601
LOC108211820	cytochrome P450 78A7-like	3.11511	0.00635519588799952
LOC108202086	22.0 kDa heat shock protein-like	3.11255	0.00134266191986863
LOC108211942	uncharacterized protein LOC108211942 isoform X1	3.11219	5.11846230040889e-05
LOC108223061	AUGMIN subunit 8-like	3.11088	0.000406895483535091
LOC108204465	probable glycerol-3-phosphate acyltransferase 3 isoform X1	3.10633	0.00280966675244256
LOC108225592	uncharacterized protein LOC108225592	3.10462	7.64038161790654e-05
LOC108211806	NAC domain-containing protein 90	3.10222	0.00519142979059886
LOC108201926	uncharacterized protein LOC108201926	3.09887	7.16379398416113e-06
LOC108208969	type 2 DNA topoisomerase 6 subunit B-like isoform X1	3.09606	0.00896282464583876
LOC108197060	lycopene epsilon cyclase, chloroplastic	3.09043	7.1220876356466e-06
LOC108210132	LOW QUALITY PROTEIN: BEACH domain-containing protein C2	3.07058	2.93824947841807e-06
LOC108208377	uncharacterized protein LOC108208377	3.06785	0.000364972269542771
LOC108197547	uncharacterized protein LOC108197547	3.06255	0.00824854958010763
LOC108215571	protein EXORDIUM	3.05792	1.99173293156774e-07
LOC108194029	chaperone protein dnaJ 8, chloroplastic	3.05759	1.73700315027485e-05
LOC108196795	BTB/POZ domain-containing protein At5g66560	3.05483	0.00781543233506808
LOC108221995	chitinase 2-like	3.0405	2.62358982909394e-06
LOC108208216	WUSCHEL-related homeobox 9-like isoform X1	3.02816	0.00137034674643856
LOC108197121	F-box protein CPR30-like	3.02316	0.00315036242353895
LOC108219498	callose synthase 5-like isoform X1	3.01924	0.00201267418860458
LOC108207522	delta(12)-acyl-lipid-desaturase-like	3.00964	0.00204716383220236
LOC108199779	stem-specific protein TSJT1-like	3.00829	0.00246063013978438
LOC108209749	probable phospholipid hydroperoxide glutathione peroxidase	3.00308	0.000260319183166345
LOC108228173	probable fructokinase-7	2.99955	0.00778295118017575
LOC108227194	SNF1-related protein kinase regulatory subunit gamma-like PV42a	2.99829	0.00213156108319971
LOC108220784	photosynthetic NDH subunit of subcomplex B 4, chloroplastic	2.99823	0.00551542030078854
LOC108206443	D-aminoacyl-tRNA deacylase isoform X1	2.99446	0.00862889084130265
LOC108220775	serine/threonine-protein kinase Nek4-like	2.99359	0.00051726403024588
LOC108196905	hypersensitive-induced response protein 1	2.99104	0.00386715833147155
LOC108209965	serine carboxypeptidase-like	2.99059	0.000371656497910394
LOC108225339	auxin-responsive protein SAUR32-like	2.98995	1.34900922701444e-13
LOC108228152	ultraviolet-B receptor UVR8 isoform X1	2.98642	1.12134891085828e-09
LOC108193162	oxygen-dependent coproporphyrinogen-III oxidase, chloroplastic	2.98507	0.00297089938758673
LOC108203125	probable linoleate 9S-lipoxygenase 5	2.98429	0.000671539127674133
LOC108222926	UDP-glucuronate 4-epimerase 1	2.98394	2.31084582184404e-05
LOC108199312	probable glutathione S-transferase	2.98226	0.000132367619325936
LOC108217109	L-type lectin-domain containing receptor kinase IX.1	2.98003	0.00356074595397366
LOC108206809	non-specific phospholipase C6-like	2.97454	0.0032759162838803
LOC108193639	defensin-like protein 1	2.97216	0.00648180762942021
LOC108198734	heavy metal-associated isoprenylated plant protein 21-like	2.96754	0.00361544743613042
LOC108204943	aspartate aminotransferase, cytoplasmic	2.96594	4.96384110118338e-08
LOC108216723	uncharacterized protein LOC108216723	2.96226	4.46807019775345e-06
LOC108224920	nicotinamidase 1-like	2.95011	2.14722095894058e-05
LOC108222501	uncharacterized protein LOC108222501	2.95004	0.000343038814887233
LOC108211918	heat stress transcription factor B-3-like	2.9484	0.00559972551161854
LOC108205946	uncharacterized protein LOC108205946	2.9448	3.25317582065661e-06
LOC108208954	pyruvate kinase 1, cytosolic-like	2.94141	0.00152050172196644
LOC108222233	zinc finger protein ZAT12-like	2.94039	0.00745472333056049
LOC108217085	LOW QUALITY PROTEIN: cytochrome P450 81D1-like	2.93218	0.000113276553541657
LOC108223962	uncharacterized protein LOC108223962	2.92481	0.00648246802537775
LOC108217714	uncharacterized protein LOC108217714	2.91254	3.71104748090332e-17
LOC108206349	uncharacterized protein LOC108206349	2.90951	0.000592482801461647
LOC108207023	protein transport protein Sec61 subunit alpha-like	2.90693	0.00447566572153134
LOC108208955	pyruvate kinase 1, cytosolic-like	2.90301	0.00140313662692998
LOC108195030	uncharacterized protein LOC108195030	2.89746	1.26526064668909e-05
LOC108207689	cation/H(+) antiporter 24	2.89459	0.00040401878219241
LOC108208921	lysine-specific demethylase JMJ18-like	2.89224	0.00280966675244256
LOC108206923	plant intracellular Ras-group-related LRR protein 5-like	2.88798	0.000265857325964074
LOC108193580	UDP-glucose 6-dehydrogenase 3-like	2.88696	0.00209981943570611
LOC108222594	ammonium transporter 3 member 3-like	2.88564	0.00486893387802902
LOC108217531	uncharacterized protein LOC108217531	2.88374	1.70689196607789e-13
LOC108195000	zinc finger MYM-type protein 1-like	2.8815	0.00903507574567598
LOC108193543	lipid phosphate phosphatase 1-like isoform X1	2.88034	0.00127256281598943
LOC108223132	shikimate O-hydroxycinnamoyltransferase-like	2.87762	0.0024741818460744
LOC108197499	wall-associated receptor kinase 5-like	2.87685	0.00459888189191726
LOC108225708	uncharacterized protein LOC108225708	2.87438	0.00400346666804796
LOC108220294	uncharacterized protein LOC108220294	2.87276	5.380788729137e-05
LOC108220330	probable stress-associated endoplasmic reticulum protein	2.87205	0.00674278515973038
LOC108211095	uncharacterized protein LOC108211095	2.86986	0.00117680098941189
LOC108201661	cytochrome P450 71D10-like	2.86896	0.00194606511587173
LOC108211915	NAC domain-containing protein 100-like	2.86645	0.00519016775492461
LOC108226135	UDP-glycosyltransferase 76G1-like	2.85894	0.000832627523039975
LOC108205795	slit homolog 2 protein-like isoform X1	2.85892	0.00525603713517488
LOC108200685	cysteine-rich and transmembrane domain-containing protein A-like	2.85599	0.00812606750042916
LOC108223073	serine/threonine protein phosphatase 2A 55 kDa regulatory subunit B beta isoform-like	2.84385	4.12115432947164e-06
LOC108210386	putative quinone-oxidoreductase homolog, chloroplastic	2.84129	3.73046493244463e-05
LOC108200253	sulfate transporter 1.3-like	2.83924	0.00356074595397366
LOC108216539	oleosin 16.4 kDa-like	2.83615	0.0048939955611477
LOC108208050	uncharacterized protein LOC108208050	2.8358	0.00279058033182979
LOC108214675	uncharacterized oxidoreductase At4g09670-like	2.83457	0.00193001221087184
LOC108215965	dehydration-responsive element-binding protein 2A-like	2.83417	0.00040401878219241
LOC108210957	uncharacterized protein At3g28850	2.83064	0.00171544322109437
LOC108196186	potassium channel SKOR-like isoform X1	2.82474	0.000312652547473992
LOC108193298	cysteine-rich receptor-like protein kinase 3	2.82163	0.000741006486875912
LOC108194132	uncharacterized protein LOC108194132 isoform X1	2.81958	0.00209981943570611
LOC108195429	phosphoinositide phospholipase C 1-like	2.8193	0.00290030750662608
LOC108204378	uncharacterized protein LOC108204378	2.81781	0.000111626858819249
LOC108214776	uncharacterized protein LOC108214776	2.81425	0.000874139264544054
LOC108216011	ubiquitin carboxyl-terminal hydrolase 22-like	2.8123	1.75104308920469e-06
LOC108197414	1-aminocyclopropane-1-carboxylate oxidase homolog isoform X1	2.81192	0.000647323525253923
LOC108202412	protein PLANT CADMIUM RESISTANCE 2-like	2.81045	4.72792860322765e-08
LOC108212835	(R)-limonene synthase 1-like	2.80429	0.0063527483130017
LOC108192787	fructose-bisphosphate aldolase 1, chloroplastic	2.79621	0.00818274541869439
LOC108214189	diacylglycerol kinase 5	2.79604	0.000783082478427209
LOC108216211	zinc finger AN1 domain-containing stress-associated protein 12	2.79469	5.02753766165732e-05
LOC108207762	uncharacterized protein LOC108207762	2.79441	0.000147125747664381
LOC108218528	uncharacterized protein LOC108218528	2.79145	0.00799660860794617
LOC108213065	protein SPEAR1	2.78775	0.0038382938967387
LOC108212411	uncharacterized protein LOC108212411	2.78746	0.000334613093375104
LOC108212285	serine/threonine-protein kinase OXI1-like	2.7832	0.00228251472527769
LOC108216457	uncharacterized protein At3g17950	2.78172	0.00471843827988475
LOC108194275	probable serine/threonine-protein kinase At1g54610 isoform X1	2.78126	0.000220836306494921
LOC108224655	uncharacterized protein LOC108224655	2.77932	2.93824947841807e-06
LOC108225127	UPF0496 protein At4g34320-like	2.7793	0.000834157686668067
LOC108198874	uncharacterized protein LOC108198874	2.77787	0.00935046252204957
LOC108207187	uncharacterized protein LOC108207187	2.77446	6.21594622927317e-07
LOC108194372	uncharacterized protein LOC108194372	2.77307	0.00481086619620731
LOC108205891	uncharacterized protein LOC108205891 isoform X1	2.7684	0.00108784805735481
LOC108207693	mitogen-activated protein kinase kinase kinase ANP1-like	2.76821	3.68544031892311e-12
LOC108205608	GDSL esterase/lipase At4g01130-like isoform X1	2.76819	0.00302034171604292
LOC108226986	dirigent protein 1-like	2.76639	0.0049824614947587
LOC108226537	peptide methionine sulfoxide reductase B5-like	2.75949	1.27655888816008e-06
LOC108198821	DNA-directed RNA polymerase V subunit 5A-like	2.75908	0.00740024652156785
LOC108215799	cinnamoyl-CoA reductase 2-like	2.75608	0.000409688061500406
LOC108224031	inositol-pentakisphosphate 2-kinase-like	2.75351	0.0092001012618417
LOC108210691	probable aldo-keto reductase 5	2.75006	0.000900662661826207
LOC108220644	probable BOI-related E3 ubiquitin-protein ligase 3	2.74982	0.00783733850798431
LOC108213743	GATA transcription factor 5-like	2.74796	0.00140660617911087
LOC108225915	uncharacterized protein LOC108225915	2.74743	0.000554902680927619
LOC108202675	glutamate--glyoxylate aminotransferase 2-like	2.7433	0.00452094626718695
LOC108226448	interactor of constitutive active ROPs 2, chloroplastic-like	2.74182	0.000547527394737608
LOC108226636	LOW QUALITY PROTEIN: putative kinase-like protein TMKL1	2.74102	0.00449167401716746
LOC108226613	phosphatidylinositol/phosphatidylcholine transfer protein SFH6-like isoform X1	2.73683	0.00614801981767861
LOC108219083	uncharacterized protein LOC108219083 isoform X1	2.73391	0.00295492421222174
LOC108207942	uncharacterized protein LOC108207942	2.73205	0.000754496937026674
LOC108206113	uncharacterized protein LOC108206113	2.72983	0.00956009763644142
LOC108217667	protein trichome birefringence-like 43	2.72161	6.13387878444575e-09
LOC108193188	4-coumarate--CoA ligase-like 9	2.72113	0.000886891301339476
LOC108227167	glutamine--tRNA ligase, cytoplasmic isoform X1	2.71668	0.00522289166921126
LOC108216163	F-box/kelch-repeat protein At2g44130-like	2.70928	0.00035884856847686
LOC108193769	uncharacterized protein LOC108193769	2.69919	5.12440443289784e-05
LOC108223607	caffeoylshikimate esterase-like	2.6984	0.000149873539616952
LOC108200544	phosphoglycerate mutase-like protein AT74	2.69266	0.00137824313331317
LOC108208876	phosphoribulokinase, chloroplastic	2.6885	2.37187475100042e-05
LOC108225893	basic 7S globulin-like	2.6806	0.00537158636156858
LOC108226715	1-aminocyclopropane-1-carboxylate synthase 3-like	2.67549	0.00235983723772047
LOC108220756	putative F-box protein At1g46984	2.66884	0.00606537874765143
LOC108211264	12-oxophytodienoate reductase 2-like	2.66813	8.64645168328192e-06
LOC108215328	uncharacterized protein LOC108215328	2.66465	4.02631844806295e-06
LOC108198697	uncharacterized protein At4g14450, chloroplastic-like	2.65875	7.94884104606713e-05
LOC108225634	cytochrome P450 76AD1-like	2.65869	0.000380336894747712
LOC108210574	xylulose kinase-like	2.65837	0.00684705268261275
LOC108215423	serine/threonine-protein phosphatase 6 regulatory ankyrin repeat subunit B-like	2.65613	0.00101325778556469
LOC108204632	universal stress protein PHOS32	2.64864	0.000784535710811873
LOC108222160	transmembrane protein 230-like	2.64777	0.00851152096593264
LOC108197602	flavin-dependent oxidoreductase FOX1-like	2.64728	6.31155558315337e-07
LOC108204541	protein O-glucosyltransferase 1-like	2.64701	0.000857953990373758
LOC108195837	cytochrome P450 71A26-like	2.64516	0.00224829118484023
LOC108213090	cytochrome P450 CYP82D47-like	2.64355	0.0060738468964342
LOC108195320	copper transporter 5.1-like	2.64341	0.00964709041791959
NA	NA	2.64284	2.05699764724338e-06
LOC108211283	cysteine proteinase inhibitor B	2.64223	0.0070373504460067
LOC108210620	ribulose bisphosphate carboxylase/oxygenase activase, chloroplastic-like	2.64166	0.000340050037440611
LOC108195041	uncharacterized protein LOC108195041	2.62814	4.52295717585641e-12
LOC108223646	stress-related protein-like	2.62445	0.00192671596571127
LOC1082LOC10876	nuclear pore complex protein NUP98B-like isoform X1	2.61876	5.29652726140091e-11
108210876	nuclear pore complex protein NUP98B-like isoform X1	2.61876	5.29652726140091e-11
108210876	nuclear pore complex protein NUP98A-like isoform X1	2.61876	5.29652726140091e-11
LOC108199900	alcohol dehydrogenase 1-like	2.61735	0.0043908351551376
LOC108225982	uncharacterized protein LOC108225982	2.61391	0.000117820488548986
LOC108205084	DNA oxidative demethylase ALKBH2	2.61269	1.06907993601219e-13
LOC108197084	metalloendoproteinase 2-MMP-like	2.61027	0.00353683584297264
LOC108198705	uncharacterized protein LOC108198705	2.60504	0.000900662661826207
LOC108197848	protein kinase APK1B, chloroplastic	2.59725	0.0022649744526494
108197848	protein kinase APK1B, chloroplastic	2.59725	0.0022649744526494
LOC108214548	ABC transporter B family member 15-like	2.59717	0.00560531366319106
LOC108226149	2-hydroxyisoflavanone dehydratase-like	2.58794	0.0014103661133062
LOC108218525	heavy metal-associated isoprenylated plant protein 3-like	2.58505	0.000279313965911769
LOC108224909	glutaredoxin-like	2.58433	0.000394657069669649
LOC108214419	dof zinc finger protein DOF2.2-like	2.58045	0.00307907626911782
LOC108205075	sugar phosphatase YfbT-like	2.57943	3.40077179050129e-07
LOC108197025	endoplasmic reticulum oxidoreductin-2-like	2.57558	0.00528599588794407
LOC108221721	probable protein phosphatase 2C 63	2.57546	0.000111928173502035
NA	NA	2.57502	2.60238192607092e-05
LOC108199625	myosin-binding protein 3	2.57326	0.00422340311613601
LOC108216495	putative HVA22-like protein g	2.57092	5.4609970066751e-08
108216495	putative HVA22-like protein g	2.57092	5.4609970066751e-08
LOC108196297	phosphatidylinositol 4-kinase gamma 7-like	2.56718	5.62676202379674e-05
108196297	phosphatidylinositol 4-kinase gamma 7-like	2.56718	5.62676202379674e-05
108196297	phosphatidylinositol 4-kinase gamma 7-like	2.56718	5.62676202379674e-05
LOC108225182	F-box protein At5g52880	2.56694	0.000836707298116707
LOC108193518	uncharacterized membrane protein At3g27390	2.56683	0.000663307239450484
LOC108216515	uncharacterized protein LOC108216515	2.56682	5.75031470194318e-05
LOC108222348	uncharacterized protein LOC108222348	2.56628	0.00447672413803726
LOC108214122	calcium-dependent protein kinase 29	2.56553	0.000662168923776557
NA	NA	2.56515	1.27008616387723e-12
LOC108214665	probable galacturonosyltransferase-like 7	2.56478	6.18054562975454e-07
NA	NA	2.56477	4.41346620074961e-12
NA	NA	2.56323	2.26653465752533e-12
LOC108210557	probable protein phosphatase 2C 25	2.56207	0.000439362993401557
LOC108222242	subtilisin-like protease SBT5.3	2.55724	0.00836222263989677
LOC108221947	protein PIN-LIKES 3-like isoform X1	2.55369	4.42156495576954e-05
108221947	protein PIN-LIKES 3-like isoform X1	2.55369	4.42156495576954e-05
108221947	protein PIN-LIKES 3-like isoform X1	2.55369	4.42156495576954e-05
LOC108219389	uncharacterized protein LOC108219389 isoform X1	2.54946	0.00778295118017575
108219389	uncharacterized protein LOC108219389 isoform X1	2.54946	0.00778295118017575
LOC108193972	uncharacterized protein LOC108193972	2.54444	0.000969572504633647
LOC108216466	uncharacterized protein LOC108216466	2.54334	7.79821744779214e-05
LOC108202939	uncharacterized protein LOC108202939	2.54298	0.00420434814285556
108202939	uncharacterized protein LOC108202939	2.54298	0.00420434814285556
108202939	uncharacterized protein LOC108202939	2.54298	0.00420434814285556
108202939	uncharacterized protein LOC108202939	2.54298	0.00420434814285556
108202939	uncharacterized protein LOC108202939	2.54298	0.00420434814285556
LOC108197086	uncharacterized protein LOC108197086	2.54242	0.00289765095205899
LOC108219143	uncharacterized protein LOC108219143	2.54241	0.00246110180919483
LOC108225938	uncharacterized protein LOC108225938	2.54109	0.00721454697453806
LOC108220540	uncharacterized protein LOC108220540	2.53568	0.00575726086286167
LOC108214741	beta-galactosidase-like isoform X1	2.53495	0.000147245700371212
108214741	beta-galactosidase-like isoform X1	2.53495	0.000147245700371212
108214741	beta-galactosidase-like isoform X1	2.53495	0.000147245700371212
LOC108211013	ferredoxin, root R-B2-like	2.5319	0.00150125828748733
LOC108221886	uncharacterized protein At1g76070-like	2.53147	0.000264804407142649
LOC108227237	protein QUIRKY isoform X1	2.53001	0.000862304109501748
108227237	protein QUIRKY isoform X1	2.53001	0.000862304109501748
LOC108210648	basic 7S globulin-like	2.52941	2.21300451409058e-11
LOC108201383	uncharacterized protein LOC108201383	2.52908	0.000452814324617737
LOC108214644	uncharacterized protein LOC108214644	2.52546	0.000620798588436464
LOC108194149	uncharacterized protein LOC108194149	2.52513	1.12074879773861e-08
LOC108199689	myb-like protein X	2.52349	0.00921174737159192
108199689	myb-like protein X	2.52349	0.00921174737159192
LOC108222697	transcription factor GAMYB-like	2.52337	0.000550109748460665
LOC108201773	BOI-related E3 ubiquitin-protein ligase 1-like isoform X1	2.5213	0.00150125828748733
108201773	BOI-related E3 ubiquitin-protein ligase 1-like isoform X1	2.5213	0.00150125828748733
108201773	BOI-related E3 ubiquitin-protein ligase 1-like isoform X1	2.5213	0.00150125828748733
LOC108206608	uncharacterized protein LOC108206608	2.52128	0.000674065684231354
108206608	uncharacterized protein LOC108206608	2.52128	0.000674065684231354
LOC108220977	zinc finger protein GIS2-like	2.51975	0.00796178605046259
108220977	zinc finger protein GIS2-like	2.51975	0.00796178605046259
108220977	zinc finger protein GIS2-like	2.51975	0.00796178605046259
LOC108193887	uncharacterized protein LOC108193887	2.51699	0.00279356318361035
NA	NA	2.51046	5.01608458088723e-12
NA	NA	2.51016	6.50754315853971e-12
NA	NA	2.50905	8.67989430267148e-12
LOC108214526	uncharacterized protein LOC108214526 isoform X1	2.50898	0.00068522431311983
108214526	uncharacterized protein LOC108214526 isoform X1	2.50898	0.00068522431311983
LOC108217694	peptide methionine sulfoxide reductase MsrB	2.50739	2.18157880126679e-05
LOC108196816	beta-1,4-mannosyl-glycoprotein 4-beta-N-acetylglucosaminyltransferase-like isoform X1	2.50706	1.33698889514317e-09
108196816	beta-1,4-mannosyl-glycoprotein 4-beta-N-acetylglucosaminyltransferase-like isoform X1	2.50706	1.33698889514317e-09
108196816	beta-1,4-mannosyl-glycoprotein 4-beta-N-acetylglucosaminyltransferase-like isoform X1	2.50706	1.33698889514317e-09
LOC108208004	peptidyl-prolyl cis-trans isomerase CYP21-4-like	2.50678	0.00225182411327831
LOC108196005	uncharacterized protein LOC108196005	2.50451	0.00112896226031585
LOC108198010	secretory carrier-associated membrane protein 2-like	2.50098	0.00929767571265205
LOC108201098	cytochrome P450 89A2-like	2.49766	3.30802413188021e-06
LOC108200470	protein S-acyltransferase 11 isoform X1	2.49271	0.00357463293083976
108200470	uncharacterized protein LOC108200470 isoform X1	2.49271	0.00357463293083976
LOC108225215	uncharacterized protein LOC108225215	2.48486	0.00140631302576483
LOC108195905	phosphate transporter PHO1 homolog 3-like	2.48064	0.00604951739864507
LOC108217262	uncharacterized protein LOC108217262	2.48027	8.98780723466678e-11
LOC108219248	cytochrome P450 81D11-like	2.47976	0.00228096243532933
LOC108197326	uncharacterized protein LOC108197326	2.47708	0.00447566572153134
LOC108227627	protein EXPORTIN 1A	2.47651	0.0040485235130298
LOC108212895	uncharacterized protein LOC108212895	2.47621	0.00286932660939854
LOC108220264	uncharacterized protein LOC108220264	2.47499	0.00416153054246975
LOC108210738	protein yippee-like At4g27745	2.47125	4.14359355603822e-05
LOC108196206	phosphoglucomutase, cytoplasmic-like	2.46943	0.00017626034839143
108196206	phosphoglucomutase, cytoplasmic-like	2.46943	0.00017626034839143
LOC108199958	flavin-dependent oxidoreductase FOX1-like	2.46795	0.00123215746625001
LOC108227486	uncharacterized protein LOC108227486 isoform X1	2.46773	5.2726115633963e-14
108227486	uncharacterized protein LOC108227486 isoform X1	2.46773	5.2726115633963e-14
LOC108217174	uncharacterized protein LOC108217174	2.46533	0.00265640286658869
LOC108226519	calmodulin-binding protein 25	2.46421	0.00143280523343693
LOC108201730	uncharacterized protein LOC108201730	2.4636	0.00173167992375786
LOC108205742	probable methyltransferase PMT15	2.46268	0.00190080438593454
LOC108220693	uncharacterized protein LOC108220693	2.46226	0.000518196650984224
LOC108196582	uncharacterized protein LOC108196582 isoform X1	2.45921	6.31155558315337e-07
108196582	uncharacterized protein LOC108196582 isoform X1	2.45921	6.31155558315337e-07
LOC108208456	putative ripening-related protein 1	2.45667	0.00551948500604475
LOC108200714	uncharacterized lipoprotein syc1174_c-like	2.45	0.000370052583060472
LOC108214468	FAD-dependent urate hydroxylase-like	2.44796	0.00365288866260365
LOC108225472	uncharacterized protein At5g03900, chloroplastic-like	2.44083	0.00309885143604329
LOC108208804	uncharacterized protein LOC108208804	2.4382	0.00020268253624636
108208804	uncharacterized protein LOC108208804	2.4382	0.00020268253624636
108208804	uncharacterized protein LOC108208804	2.4382	0.00020268253624636
108208804	uncharacterized protein LOC108208804	2.4382	0.00020268253624636
108208804	uncharacterized protein LOC108208804	2.4382	0.00020268253624636
LOC108226458	uncharacterized protein LOC108226458	2.43819	0.00371871892779734
LOC108212996	lysine-specific demethylase JMJ706-like isoform X1	2.43264	0.00539936299070777
108212996	lysine-specific demethylase JMJ706-like isoform X1	2.43264	0.00539936299070777
LOC108220836	mediator of RNA polymerase II transcription subunit 30	2.42972	0.00520769129899443
LOC108220546	3-hexulose-6-phosphate isomerase	2.42886	0.00522584034658638
LOC108208032	uncharacterized protein LOC108208032	2.42806	2.17947916114615e-05
LOC108213267	probable aldo-keto reductase 5	2.4271	0.000161534570234639
LOC108209956	phosphoinositide phospholipase C 4-like	2.42182	0.00199943230937041
108209956	phosphoinositide phospholipase C 4-like	2.42182	0.00199943230937041
NA	NA	2.41745	2.72364678502629e-14
NA	NA	2.41603	1.65243514319155e-14
NA	NA	2.41571	6.67667165643433e-15
LOC108225142	GATA transcription factor 8-like isoform X1	2.41221	0.00209981943570611
108225142	GATA transcription factor 11-like isoform X1	2.41221	0.00209981943570611
LOC108211754	putative FBD-associated F-box protein At5g22720	2.41041	0.000155223200968545
LOC108193299	probable inactive poly	2.41035	0.00659789587733965
LOC108194050	uncharacterized protein LOC108194050	2.40702	0.00695392791607447
LOC108211022	uncharacterized protein LOC108211022	2.40449	3.71432613399723e-07
LOC108215548	UPF0496 protein 4	2.40268	2.48590189446405e-11
LOC108201774	uncharacterized protein LOC108201774	2.40124	0.000982033795318531
108201774	uncharacterized protein LOC108201774	2.40124	0.000982033795318531
LOC108222175	26.5 kDa heat shock protein, mitochondrial	2.39644	2.28960235312852e-05
LOC108198248	WUSCHEL-related homeobox 9-like	2.39314	7.12161839698427e-09
LOC108212539	uncharacterized protein LOC108212539	2.38254	1.68125724090936e-06
LOC108227144	bifunctional dihydrofolate reductase-thymidylate synthase	2.3781	0.00258450574336442
108227144	bifunctional dihydrofolate reductase-thymidylate synthase	2.3781	0.00258450574336442
LOC108228100	uncharacterized protein LOC108228100	2.3735	6.52422880167729e-08
LOC108200859	uncharacterized protein LOC108200859	2.3715	0.00194119904055108
NA	NA	2.36197	2.7084473698723e-09
LOC108227866	lysine-specific demethylase JMJ706-like isoform X1	2.3527	0.00659789587733965
108227866	lysine-specific demethylase JMJ706-like isoform X1	2.3527	0.00659789587733965
LOC108223011	lysine-specific demethylase JMJ25-like isoform X1	2.34388	0.00245251573877964
108223011	lysine-specific demethylase JMJ25-like isoform X1	2.34388	0.00245251573877964
NA	NA	2.3438	1.99173293156774e-07
LOC108206320	putative receptor-like protein kinase At4g00960	2.34324	7.02705860884594e-11
LOC108212589	uncharacterized protein LOC108212589	2.34286	3.5003657650044e-05
LOC108226543	probable sucrose-phosphate synthase 1	2.34023	0.00778295118017575
LOC108222012	probable histone H2A.1	2.33995	0.00024060974560386
LOC108217787	zinc finger protein ZAT12-like	2.33975	0.00142409561768012
LOC108226570	zinc finger protein ZAT10-like	2.33795	0.00718179348147209
LOC108216939	uncharacterized protein LOC108216939	2.33764	0.00472796528901687
NA	NA	2.33531	0.00701131969556049
LOC108206228	FK506-binding protein 4-like	2.33521	0.000328507645829857
LOC108219579	ethylene-responsive transcription factor 4	2.33426	7.81876917412002e-10
LOC108195228	uncharacterized protein LOC108195228	2.33285	0.00835148762894607
NA	NA	2.33185	0.00964709041791959
LOC108219337	chaperone protein dnaJ 10-like	2.33183	5.11442298126906e-17
LOC108210027	inositol oxygenase 1-like	2.33102	0.00569867712844361
LOC108211648	BEL1-like homeodomain protein 3	2.32825	0.000754748334169176
LOC108225821	sugar transporter ERD6-like 16 isoform X1	2.32622	0.00466893855220863
108225821	sugar transporter ERD6-like 16 isoform X1	2.32622	0.00466893855220863
LOC108197198	U-box domain-containing protein 16	2.3254	0.00387677494595035
LOC108210922	tropinone reductase homolog At5g06060	2.32431	0.000113295297319344
LOC108224485	REF/SRPP-like protein At3g05500	2.32307	2.60189501320325e-12
108224485	REF/SRPP-like protein At3g05500	2.32307	2.60189501320325e-12
LOC108204900	aspartic proteinase A1-like	2.32043	0.00898100582132294
LOC108218463	purple acid phosphatase 2-like	2.3198	0.00343704794794337
LOC108218680	lysine-specific demethylase JMJ25-like	2.31725	0.00795571020427796
108218680	lysine-specific demethylase JMJ25-like	2.31725	0.00795571020427796
LOC108223362	uncharacterized protein LOC108223362	2.31703	3.24083907569419e-05
LOC108195298	nudix hydrolase 18, mitochondrial-like	2.31362	2.01576499241203e-06
LOC108193628	ethylene-responsive transcription factor 12	2.31326	0.000623259104650023
LOC108211503	ribonuclease 3-like protein 3	2.31237	0.00582006412149551
LOC108215469	uncharacterized protein LOC108215469	2.30837	0.00859912688838785
LOC108200800	zinc finger protein ZAT10-like	2.30734	1.72859069519123e-05
LOC108227801	uncharacterized protein LOC108227801 isoform X1	2.30251	0.000507666871920156
108227801	uncharacterized protein LOC108227801 isoform X1	2.30251	0.000507666871920156
LOC108194137	NAC domain-containing protein 100-like	2.30223	0.00967368279367592
LOC108216165	actin-depolymerizing factor 1	2.29595	7.34718435996989e-12
LOC108216589	uncharacterized protein At1g04910-like	2.29589	6.14146176882798e-05
LOC108224818	GATA transcription factor 5	2.28957	0.00473137507950594
LOC108197081	enoyl-CoA delta isomerase 2, peroxisomal-like	2.28142	0.0010576147635191
LOC108210906	mannitol dehydrogenase-like	2.27852	0.00508460423789379
LOC108204771	glycine-rich protein A3-like	2.27817	2.48747737283182e-07
LOC108208877	uncharacterized protein LOC108208877	2.2741	7.13797385116183e-07
LOC108218889	calcium-dependent protein kinase 1-like	2.26954	1.69355970297929e-09
LOC108193461	pre-mRNA-splicing factor ATP-dependent RNA helicase DEAH1-like	2.26855	0.00334181021796862
LOC108209258	probable phospholipid-transporting ATPase 4	2.26627	2.56446727664838e-06
LOC108217744	LOW QUALITY PROTEIN: inositol-3-phosphate synthase	2.26423	0.00964709041791959
LOC108214886	floral homeotic protein APETALA 2-like	2.26277	2.08549173744187e-07
LOC108196210	vam6/Vps39-like protein isoform X1	2.2595	0.000547579667592314
108196210	vam6/Vps39-like protein isoform X1	2.2595	0.000547579667592314
108196210	vam6/Vps39-like protein isoform X1	2.2595	0.000547579667592314
108196210	vam6/Vps39-like protein isoform X1	2.2595	0.000547579667592314
LOC108224372	ribulose bisphosphate carboxylase small chain clone 512-like	2.25847	0.00236591241766428
LOC108203001	glyceraldehyde-3-phosphate dehydrogenase GAPC1, cytosolic	2.25742	8.11021633856303e-06
LOC108205584	pentatricopeptide repeat-containing protein At4g01400, mitochondrial-like	2.25591	2.22532468362129e-06
108205584	pentatricopeptide repeat-containing protein At4g01400, mitochondrial-like	2.25591	2.22532468362129e-06
108205584	pentatricopeptide repeat-containing protein At4g01400, mitochondrial-like	2.25591	2.22532468362129e-06
108205584	pentatricopeptide repeat-containing protein At4g01400, mitochondrial-like	2.25591	2.22532468362129e-06
108205584	pentatricopeptide repeat-containing protein At4g01400, mitochondrial-like	2.25591	2.22532468362129e-06
LOC108202500	glucan endo-1,3-beta-D-glucosidase	2.25586	0.000115494631091902
LOC108222463	uncharacterized protein LOC108222463	2.25518	0.00970852074806363
LOC108194427	uncharacterized protein LOC108194427	2.25264	1.82011155024726e-06
LOC108209314	PRA1 family protein F3-like isoform X1	2.25208	0.0094712408568534
LOC108198648	putative receptor protein kinase ZmPK1	2.25186	0.00519089031137338
LOC108205140	protein NRT1/ PTR FAMILY 8.3	2.25018	0.0014154904461182
LOC108221024	putative clathrin assembly protein At4g40080	2.24833	6.8136639717359e-11
LOC108201955	dnaJ homolog subfamily B member 3-like isoform X1	2.24644	0.00663200327929052
LOC108195357	CASP-like protein 5C3	2.2421	0.000553756593613543
LOC108206592	WRKY transcription factor 22-like	2.24109	3.17771628209946e-05
LOC108196016	probable GTP diphosphokinase RSH3, chloroplastic	2.23667	1.55475657918415e-06
LOC108214985	UDP-glycosyltransferase 73C6-like	2.22908	0.000178184694843102
LOC108223694	glycosyltransferase family protein 64 protein C5 isoform X1	2.22819	0.00578164977165829
LOC108227878	probable protein phosphatase 2C 60	2.22541	0.00175636266023354
LOC108198521	uncharacterized protein LOC108198521	2.21215	8.64252159107424e-06
LOC108209085	uncharacterized protein LOC108209085	2.21155	0.00204716383220236
LOC108227485	lipase member N-like isoform X1	2.21101	1.92982409225526e-13
LOC108193390	TVP38/TMEM64 family membrane protein slr0305-like	2.21058	2.40165738670189e-06
LOC108226208	malonyl-coenzyme A:anthocyanin 3-O-glucoside-6\\'\\'-O-malonyltransferase-like	2.20987	0.00201356781538423
LOC108199384	NADH-ubiquinone oxidoreductase chain 2	2.20518	9.71186402098439e-06
LOC108215226	trehalose-phosphate phosphatase A-like	2.20218	0.00392671651283687
LOC108201029	cytochrome c oxidase subunit 3	2.197	1.11875996666935e-07
LOC108193574	zinc finger RNA-binding protein 2-like	2.19694	0.00011040823411613
LOC108216454	zinc finger protein ZAT12-like	2.19602	3.41561540522597e-06
LOC108192792	glycerophosphodiester phosphodiesterase GDPD1, chloroplastic-like isoform X1	2.19459	4.52345857405206e-06
LOC108215056	BI1-like protein	2.19155	0.00221228510272531
LOC108219532	plant intracellular Ras-group-related LRR protein 4-like	2.1902	2.3611277014271e-05
LOC108211986	uncharacterized protein LOC108211986	2.19007	0.00274082633700341
LOC108207155	uncharacterized protein LOC108207155	2.1897	0.000126601532897091
LOC108219466	OTU domain-containing protein DDB_G0284757	2.18464	0.00396194223448075
LOC108206540	putative glutathione-specific gamma-glutamylcyclotransferase 2	2.18429	2.39938622249099e-08
LOC108214685	putative receptor-like protein kinase At1g72540	2.18311	5.68570419696962e-05
LOC108222885	uncharacterized protein LOC108222885	2.18217	0.000615014582407007
LOC108208068	BOI-related E3 ubiquitin-protein ligase 1-like	2.1816	0.000801632799299731
LOC108217784	F-box/FBD/LRR-repeat protein At1g13570-like	2.18073	1.26526064668909e-05
LOC108201615	protein HEADING DATE 3A-like	2.17908	0.000140676626614449
LOC108223023	uncharacterized protein LOC108223023 isoform X1	2.17875	0.0055404139402011
LOC108216400	hydrophobic protein RCI2A	2.17645	0.00070215733392327
LOC108199707	putative nuclease HARBI1	2.17552	0.000489445791223778
LOC108199706	serine/threonine-protein kinase tricorner-like	2.17242	0.000181734067696251
LOC1082LOC10822	E3 ubiquitin-protein ligase RMA1H1-like	2.16224	0.00135231353308804
LOC108223777	epidermis-specific secreted glycoprotein EP1	2.16161	0.00306139655414374
LOC108223067	uncharacterized protein LOC108223067	2.15888	7.267890897179e-06
LOC108219708	probable calcium-binding protein CML49	2.15817	9.01731515639597e-13
LOC108200286	uncharacterized protein LOC108200286 isoform X1	2.1577	0.000970650122899497
LOC108226062	lipase-like isoform X1	2.15583	2.78783565823758e-06
LOC108193968	chaperone protein dnaJ 11, chloroplastic	2.15156	0.00633321322111527
LOC108212439	E3 ubiquitin-protein ligase MARCH1	2.14684	8.14116724904861e-05
LOC108222785	F-box protein At3g07870-like	2.14655	2.25721509664979e-05
108222785	F-box protein At3g07870-like	2.14655	2.25721509664979e-05
LOC108201460	uncharacterized protein LOC108201460	2.14628	2.58043449916653e-06
LOC108196026	S-adenosylmethionine decarboxylase proenzyme	2.14367	0.000730247313584476
LOC108210690	probable aldo-keto reductase 2	2.14129	0.000302023154647392
LOC108196475	putative quinone-oxidoreductase homolog, chloroplastic	2.14015	0.000597806273502254
LOC108199753	stress-associated endoplasmic reticulum protein 2-like	2.13621	0.0047927791725832
LOC108195197	cX1C motif-containing protein 4	2.13387	6.65118686096015e-05
LOC108228124	ABC transporter A family member 2-like	2.13267	0.00497986812007005
LOC108198639	UDP-glucuronic acid decarboxylase 6	2.12435	0.00653416727854315
108198639	UDP-glucuronic acid decarboxylase 6	2.12435	0.00653416727854315
108198639	UDP-glucuronic acid decarboxylase 6	2.12435	0.00653416727854315
108198639	UDP-glucuronic acid decarboxylase 6	2.12435	0.00653416727854315
LOC108213157	E3 ubiquitin-protein ligase ATL6-like	2.12407	0.00466082428206397
LOC108227131	protein WEAK CHLOROPLAST MOVEMENT UNDER BLUE LIGHT 1-like	2.12274	0.00286373803520552
108227131	protein WEAK CHLOROPLAST MOVEMENT UNDER BLUE LIGHT 1-like	2.12274	0.00286373803520552
108227131	protein WEAK CHLOROPLAST MOVEMENT UNDER BLUE LIGHT 1-like	2.12274	0.00286373803520552
LOC108225680	dymeclin-like isoform X1	2.1227	0.00130691300696732
108225680	dymeclin-like isoform X1	2.1227	0.00130691300696732
108225680	dymeclin-like isoform X1	2.1227	0.00130691300696732
LOC108194935	uncharacterized protein LOC108194935	2.12157	0.00498390194924099
LOC108200187	zinc finger protein CONSTANS-LIKE 16-like	2.12146	0.00805094377670693
LOC108215261	probable disease resistance protein RF9 isoform X1	2.11169	0.00321650431911564
108215261	probable disease resistance protein RF9 isoform X1	2.11169	0.00321650431911564
LOC108198354	abscisic acid receptor PYL9-like	2.11136	2.08604658318317e-05
LOC108214170	uncharacterized protein LOC108214170	2.11133	0.000196386219156421
LOC108214299	cold-regulated 413 plasma membrane protein 2	2.11131	0.00516189053578991
LOC108201867	cyclin-T1-3-like isoform X1	2.11126	0.00262152703522625
108201867	cyclin-T1-3-like isoform X1	2.11126	0.00262152703522625
LOC108219870	SNF1-related protein kinase regulatory subunit beta-1	2.11003	0.000134564475462774
NA	NA	2.10907	0.000543375475967424
NA	NA	2.10827	0.000526994637956265
NA	NA	2.10787	0.000515999621362566
LOC108214802	uncharacterized mitochondrial protein ymf1-like	2.10684	3.93279023120459e-07
LOC108200746	two-component response regulator ARR1-like	2.1068	1.22624878624669e-07
NA	NA	2.10604	4.95381168225708e-07
LOC108225270	exocyst complex component SEC3A-like isoform X1	2.10251	0.00595778593364577
108225270	exocyst complex component SEC3A-like isoform X1	2.10251	0.00595778593364577
LOC108211353	probable histone acetyltransferase HAC-like 1 isoform X1	2.10224	0.000647724234056487
108211353	probable histone acetyltransferase HAC-like 1 isoform X1	2.10224	0.000647724234056487
NA	NA	2.10088	2.85465076134853e-11
LOC108222893	xylose isomerase	2.09947	0.000297854619659134
LOC108218814	plastocyanin A, chloroplastic	2.09368	2.1039963373302e-06
LOC108226372	1,2-dihydroxy-3-keto-5-methylthiopentene dioxygenase 2	2.0932	0.00084662143761946
LOC108199621	LRR receptor-like serine/threonine-protein kinase GSO1	2.09144	0.00114608784669734
NA	NA	2.09102	5.84277419662892e-10
LOC108222028	F-box protein At1g30790-like	2.09012	0.00565323859964497
LOC108218033	lanC-like protein GCL2	2.08889	5.48544886508346e-05
LOC108225993	basic 7S globulin-like	2.08842	0.000662168923776557
LOC108223895	uncharacterized protein LOC108223895	2.08605	6.25411835478134e-06
LOC108212782	transcriptional regulator TAC1-like	2.085	4.16919650607511e-06
LOC108204263	uncharacterized protein LOC108204263	2.08013	0.00928884298902719
LOC108214942	uncharacterized protein LOC108214942 isoform X1	2.07549	0.00298929817505184
108214942	uncharacterized protein LOC108214942 isoform X1	2.07549	0.00298929817505184
NA	NA	2.07254	2.43280288592836e-13
LOC108215634	acyl-coenzyme A oxidase 2, peroxisomal-like	2.07069	0.00912970145778205
LOC108219580	protein yippee-like At5g53940	2.06555	0.00119791149240357
LOC108199889	protein SRC2	2.06371	4.07059791082625e-06
LOC108223818	protein DA1-like isoform X1	2.06195	1.09505385239963e-06
108223818	protein DA1-like isoform X1	2.06195	1.09505385239963e-06
108223818	protein DA1-like isoform X1	2.06195	1.09505385239963e-06
LOC108199715	uncharacterized protein LOC108199715	2.06143	5.01245120316438e-06
NA	NA	2.06092	1.21539728225484e-06
LOC108199761	lysine-specific demethylase JMJ25-like	2.05836	0.00461480340731999
108199761	lysine-specific demethylase JMJ25-like	2.05836	0.00461480340731999
LOC108204404	heat stress transcription factor A-7a-like isoform X1	2.05758	0.000390010545548531
108204404	heat stress transcription factor A-7a-like isoform X1	2.05758	0.000390010545548531
108204404	heat stress transcription factor A-7a-like isoform X1	2.05758	0.000390010545548531
108204404	heat stress transcription factor A-7a-like isoform X1	2.05758	0.000390010545548531
108204404	heat stress transcription factor A-7a-like isoform X1	2.05758	0.000390010545548531
108204404	heat stress transcription factor A-7a-like isoform X1	2.05758	0.000390010545548531
LOC108226265	uncharacterized protein LOC108226265	2.05718	3.84182748595285e-07
LOC108220321	glycine-rich protein DC7.1	2.05707	0.00507245988666923
LOC108195094	formin-like protein 20	2.05631	0.000834472003087408
LOC108217632	fatty acid hydroperoxide lyase, chloroplastic-like	2.05139	0.00373183729245286
LOC108214951	TBC1 domain family member 15-like isoform X1	2.05058	4.75321839585231e-09
108214951	TBC1 domain family member 15-like isoform X1	2.05058	4.75321839585231e-09
LOC108224452	ACT domain-containing protein ACR11-like	2.04635	0.00229649103248186
LOC108200616	beta-hexosaminidase 2-like	2.03809	0.000155701458084491
NA	NA	2.0374	5.31668630409896e-07
LOC108216934	uncharacterized protein LOC108216934	2.03713	0.00828200723854714
LOC108201045	uncharacterized protein LOC108201045 isoform X1	2.03658	0.00466320560733901
108201045	uncharacterized protein LOC108201045 isoform X1	2.03658	0.00466320560733901
LOC108225740	scopoletin glucosyltransferase-like	2.03605	0.00322609680393677
LOC108219356	protein EARLY RESPONSIVE TO DEHYDRATION 15-like	2.03538	0.00504985662914694
LOC108219159	B-box zinc finger protein 22-like	2.03428	0.000459142138377911
LOC108226827	17.1 kDa class II heat shock protein-like	2.03045	0.00353552538288902
LOC108215467	scarecrow-like protein 8	2.02707	0.000258981391084166
LOC108196505	linoleate 13S-lipoxygenase 3-1, chloroplastic-like	2.0261	0.00626766917281396
LOC108217785	uncharacterized exonuclease domain-containing protein At3g15140-like isoform X1	2.02439	0.00602945977138606
108217785	uncharacterized exonuclease domain-containing protein At3g15140-like isoform X1	2.02439	0.00602945977138606
NA	NA	2.0238	4.4732416283181e-09
LOC108212014	uncharacterized protein LOC108212014	2.01892	0.00775776249480285
LOC108221241	uncharacterized protein LOC108221241	2.01859	0.00481086619620731
LOC108194644	uncharacterized protein LOC108194644	2.01748	0.00492030150747111
LOC108209463	U-box domain-containing protein 33-like isoform X1	2.01542	1.1920885754082e-05
108209463	U-box domain-containing protein 33-like isoform X1	2.01542	1.1920885754082e-05
LOC108222815	alpha,alpha-trehalose-phosphate synthase	2.01455	0.000294968915777137
108222815	alpha,alpha-trehalose-phosphate synthase	2.01455	0.000294968915777137
108222815	alpha,alpha-trehalose-phosphate synthase	2.01455	0.000294968915777137
108222815	alpha,alpha-trehalose-phosphate synthase	2.01455	0.000294968915777137
LOC108218692	triacylglycerol lipase SDP1	2.01395	4.8828023156576e-10
108218692	triacylglycerol lipase SDP1	2.01395	4.8828023156576e-10
LOC108210451	zinc finger AN1 and C2H2 domain-containing stress-associated protein 13	2.01374	0.00308540026226631
LOC108224470	bet1-like protein At4g14600	2.00935	3.15154893911195e-06
LOC108228085	uncharacterized protein LOC108228085 isoform X1	2.00733	0.000637176520165488
108228085	uncharacterized protein LOC108228085 isoform X1	2.00733	0.000637176520165488
108228085	uncharacterized protein LOC108228085 isoform X1	2.00733	0.000637176520165488
LOC108209030	uncharacterized protein LOC108209030	2.00428	0.00118103489658969
LOC108206412	zinc transporter 2	2.00385	0.00302723127609571
NA	NA	2.00303	1.23740043843531e-08
NA	NA	2.00289	2.95409232955983e-10
LOC108206170	uncharacterized protein LOC108206170	2.00189	0.00334144206163688
LOC108206319	zinc finger A20 and AN1 domain-containing stress-associated protein 5	2.00165	0.000205702886390779
LOC108197986	probable ADP-ribosylation factor GTPase-activating protein AGD5 isoform X1	1.99766	1.99748912359943e-07
108197986	probable ADP-ribosylation factor GTPase-activating protein AGD5 isoform X1	1.99766	1.99748912359943e-07
LOC108222213	alpha,alpha-trehalose-phosphate synthase	1.99491	0.000333136959957471
LOC108223241	dnaJ protein homolog	1.99306	6.23215113808593e-06
LOC108199314	probable glutathione S-transferase	1.99203	0.00388252615208314
LOC108214439	catalase	1.99199	2.01576499241203e-06
LOC108214317	probable RNA-dependent RNA polymerase 3 isoform X1	1.99191	0.00137915857122217
108214317	probable RNA-dependent RNA polymerase 3 isoform X1	1.99191	0.00137915857122217
108214317	probable RNA-dependent RNA polymerase 3 isoform X1	1.99191	0.00137915857122217
LOC108199071	1-aminocyclopropane-1-carboxylate oxidase homolog 1-like	1.98825	2.08056926203581e-05
LOC108210709	uncharacterized protein LOC108210709	1.98741	0.000450044460397353
LOC108200266	uncharacterized protein LOC108200266	1.98697	1.03764997335695e-05
108200266	uncharacterized protein LOC108200266	1.98697	1.03764997335695e-05
108200266	uncharacterized protein LOC108200266	1.98697	1.03764997335695e-05
LOC108196877	E3 ubiquitin-protein ligase RNF126-like	1.9862	0.00153485384911418
108196877	E3 ubiquitin-protein ligase RNF126-like	1.9862	0.00153485384911418
LOC108215756	uncharacterized protein LOC108215756	1.98517	0.00738370529888487
NA	NA	1.9836	2.80929581194864e-14
LOC108215976	chaperone protein DnaJ-like	1.98214	5.31668630409896e-07
NA	NA	1.98122	6.1401744982607e-10
LOC108199906	abscisic acid receptor PYL9-like	1.97922	4.28675832799679e-05
LOC108224783	E3 ubiquitin-protein ligase RNF185-like	1.97718	0.000205365308108708
LOC108200381	mitochondrial uncoupling protein 3	1.9723	1.83481637927883e-09
LOC108215430	mitogen-activated protein kinase kinase kinase NPK1	1.97063	0.00565505022291433
LOC108202817	cinnamoyl-CoA reductase 1-like	1.96271	4.77767216631449e-10
LOC108209112	vesicle-associated protein 4-2-like	1.96258	0.00844449440638786
LOC108209919	fructose-bisphosphate aldolase-lysine N-methyltransferase, chloroplastic isoform X1	1.95924	0.00464258725222252
108209919	ribosomal lysine N-methyltransferase 4 isoform X1	1.95924	0.00464258725222252
LOC108213007	gamma-glutamyltranspeptidase 3-like	1.95529	0.000615014582407007
NA	NA	1.95374	9.83365171064036e-07
NA	NA	1.95269	9.83365171064036e-07
NA	NA	1.9525	9.59168032707969e-07
LOC108216264	uncharacterized protein LOC108216264	1.95095	0.00314115152201934
NA	NA	1.95044	3.99792198807761e-10
LOC108197378	probable protein phosphatase 2C 13	1.9448	0.00497608476016378
LOC108197379	probable protein phosphatase 2C 13	1.9448	0.00497608476016378
LOC108196029	uncharacterized protein LOC108196029	1.94251	0.000889772241677797
108196029	uncharacterized protein LOC108196029	1.94251	0.000889772241677797
LOC108194800	TMV resistance protein N-like	1.938	0.00101695935258656
LOC108219074	trihelix transcription factor PTL	1.93626	9.09647305106775e-06
LOC108195135	mitogen-activated protein kinase kinase 9	1.93576	5.96691141265081e-05
LOC108194000	uncharacterized protein LOC108194000 isoform X1	1.93554	0.00153153061590515
108194000	uncharacterized protein LOC108194000 isoform X1	1.93554	0.00153153061590515
LOC108212327	transcription elongation factor 1 homolog	1.9339	3.71057257807506e-07
LOC108214163	F-box protein At1g47056-like	1.93335	0.00114187971026151
LOC108227677	serine/threonine-protein kinase CTR1 isoform X1	1.93239	8.80783875108756e-05
108227677	serine/threonine-protein kinase CTR1 isoform X1	1.93239	8.80783875108756e-05
LOC108218348	probable LRR receptor-like serine/threonine-protein kinase At1g53440 isoform X1	1.93184	0.000380336894747712
108218348	probable LRR receptor-like serine/threonine-protein kinase At1g53440 isoform X1	1.93184	0.000380336894747712
108218348	probable LRR receptor-like serine/threonine-protein kinase At1g53440 isoform X1	1.93184	0.000380336894747712
108218348	probable LRR receptor-like serine/threonine-protein kinase At1g53440 isoform X1	1.93184	0.000380336894747712
108218348	probable LRR receptor-like serine/threonine-protein kinase At1g53440 isoform X1	1.93184	0.000380336894747712
108218348	probable LRR receptor-like serine/threonine-protein kinase At1g53430 isoform X1	1.93184	0.000380336894747712
108218348	probable LRR receptor-like serine/threonine-protein kinase At1g53440 isoform X1	1.93184	0.000380336894747712
108218348	probable LRR receptor-like serine/threonine-protein kinase At1g53440 isoform X1	1.93184	0.000380336894747712
108218348	probable LRR receptor-like serine/threonine-protein kinase At1g53440 isoform X1	1.93184	0.000380336894747712
NA	NA	1.92998	8.06297512199457e-05
LOC108209755	abscisic acid receptor PYL9	1.92972	0.00345508610691218
LOC108206178	uncharacterized protein LOC108206178	1.92881	0.000591944272032841
LOC108208996	uncharacterized protein LOC108208996	1.92156	6.61208591232173e-05
LOC108211911	pathogen-related protein-like	1.92043	0.00184806930526965
LOC108205651	ubiquitin-conjugating enzyme E2 5-like	1.92008	2.71312512239939e-05
LOC108198467	uncharacterized protein LOC108198467	1.91916	3.71225478658542e-05
LOC108197231	uncharacterized protein LOC108197231	1.91073	1.26526064668909e-05
LOC108219465	leucine-rich repeat extensin-like protein 5	1.90915	0.00557833269716581
LOC108200052	protein phosphatase 2C 37	1.90606	2.20194338544031e-05
LOC108214800	cytochrome c oxidase subunit 2	1.90536	3.11584417889263e-06
LOC108215318	U-box domain-containing protein 9-like	1.90498	0.00418350263908902
LOC108200000	uncharacterized protein LOC108200000	1.90378	0.000126972441530488
LOC108194148	uncharacterized protein LOC108194148	1.90261	0.0059982515695139
NA	NA	1.90259	3.23625937039002e-06
NA	NA	1.90246	0.00017612976349186
LOC108220066	uncharacterized protein LOC108220066	1.90223	3.55624375437557e-05
LOC108214716	probable mediator of RNA polymerase II transcription subunit 26b	1.9005	0.000900653185195251
LOC108218649	protein QUIRKY	1.89748	0.00952274918570647
LOC108199136	basic leucine zipper 9-like	1.89308	0.00373183729245286
LOC108219166	uncharacterized protein LOC108219166	1.89294	0.00250099989321665
LOC108218602	uncharacterized protein LOC108218602 isoform X1	1.88528	0.000602513195821836
108218602	uncharacterized protein LOC108218602 isoform X1	1.88528	0.000602513195821836
LOC108222073	endoplasmic reticulum oxidoreductin-1-like	1.88497	0.00186222259759671
LOC108216010	ras-related protein RABB1b	1.88275	0.00140470749298569
LOC108215697	thioredoxin-like 1-1, chloroplastic	1.8794	1.30555376030692e-05
LOC108225253	chaperone protein dnaJ 72	1.87636	5.87840255736344e-05
NA	NA	1.87558	6.94263035362119e-07
LOC108215546	protein ABHD18	1.87507	0.00070215733392327
LOC108199279	phosphatidylinositol 4-kinase gamma 7-like	1.87394	0.00268437154805525
LOC108204659	major pollen allergen Ole e 1-like	1.86821	0.00373594968816721
LOC108227644	autophagy-related protein 18f	1.86776	4.25637956297606e-05
LOC108205262	putative F-box protein PP2-B12	1.8652	0.00627770852354709
LOC108210920	uncharacterized protein LOC108210920	1.86334	0.000258324101553416
LOC108205478	copper-transporting ATPase RAN1-like	1.86113	1.21539728225484e-06
LOC108226780	gibberellin 3-beta-dioxygenase 1-like	1.85629	0.00496508456222439
LOC108222633	acidic leucine-rich nuclear phosphoprotein 32-related protein	1.85617	6.97781325574848e-06
LOC108199929	cellulose synthase-like protein D3	1.85503	0.00129938868111679
108199929	cellulose synthase-like protein D3	1.85503	0.00129938868111679
LOC108225737	UDP-glycosyltransferase 73C6-like	1.85462	0.00337544475511621
LOC108200807	uncharacterized protein LOC108200807	1.85455	5.7299863875501e-06
108200807	uncharacterized protein LOC108200807	1.85455	5.7299863875501e-06
LOC108199378	probable alpha,alpha-trehalose-phosphate synthase	1.85339	5.71873391342756e-09
108199378	probable alpha,alpha-trehalose-phosphate synthase	1.85339	5.71873391342756e-09
LOC108205697	uncharacterized protein LOC108205697	1.8513	0.00179660065707628
LOC108215641	monogalactosyldiacylglycerol synthase 2, chloroplastic-like	1.84603	0.000335617073197477
LOC108196391	uncharacterized protein LOC108196391 isoform X1	1.83644	0.00793340685669624
108196391	uncharacterized protein LOC108196391 isoform X1	1.83644	0.00793340685669624
LOC108223647	BSD domain-containing protein 1-like isoform X1	1.83546	0.00249132131127634
108223647	protein DOS2-like isoform X1	1.83546	0.00249132131127634
LOC108202832	corepressor interacting with RBPJ 1	1.82796	0.000339977846249987
108202832	corepressor interacting with RBPJ 1	1.82796	0.000339977846249987
108202832	corepressor interacting with RBPJ 1	1.82796	0.000339977846249987
LOC108216024	membrin-11	1.82712	2.34934869337499e-07
LOC108214751	probable alpha,alpha-trehalose-phosphate synthase	1.82647	0.00177153982402139
NA	NA	1.82629	7.26666822476992e-08
NA	NA	1.82382	0.000978089838961529
LOC108220131	uncharacterized protein LOC108220131	1.82365	0.00969370402232682
LOC108225344	heavy metal-associated isoprenylated plant protein 3-like	1.82308	2.25721509664979e-05
LOC108225354	heavy metal-associated isoprenylated plant protein 3-like	1.82308	2.25721509664979e-05
NA	NA	1.82222	0.000887409508725167
LOC108214400	tetrahydrocannabinolic acid synthase-like	1.82127	0.00233526829974021
LOC108223674	transcription factor bHLH143-like	1.82119	0.0026528203600108
NA	NA	1.8205	0.000811308923785862
LOC108225207	ethylene-responsive transcription factor 4-like	1.81838	0.00621236861255971
LOC108193812	LOW QUALITY PROTEIN: E3 ubiquitin-protein ligase Topors	1.81783	0.000709208801765881
LOC108197005	U11/U12 small nuclear ribonucleoprotein 31 kDa protein	1.81563	0.00657336466726708
108197005	U11/U12 small nuclear ribonucleoprotein 31 kDa protein	1.81563	0.00657336466726708
LOC108211180	E3 ubiquitin-protein ligase RDUF1-like	1.81018	0.00343808063393801
LOC108223780	DCN1-like protein 1	1.80971	1.07049083443272e-06
LOC108210751	cytochrome P450 94A1-like	1.80803	0.00214329221965806
LOC108206522	ethylene-responsive transcription factor 4-like	1.80742	0.000633813434639469
LOC108224663	uncharacterized protein LOC108224663	1.80572	0.00083010552427353
LOC108200034	coronatine-insensitive protein 1-like	1.80425	0.00809041717472088
LOC108216679	probable glycosyltransferase At5g03795	1.80397	0.00306960295749789
LOC108227749	SPX and EXS domain-containing protein 1-like isoform X1	1.80213	1.49058731569898e-09
108227749	SPX and EXS domain-containing protein 1-like isoform X1	1.80213	1.49058731569898e-09
108227749	SPX and EXS domain-containing protein 1-like isoform X1	1.80213	1.49058731569898e-09
108227749	SPX and EXS domain-containing protein 1-like isoform X1	1.80213	1.49058731569898e-09
108227749	SPX and EXS domain-containing protein 1-like isoform X1	1.80213	1.49058731569898e-09
108227749	SPX and EXS domain-containing protein 1-like isoform X1	1.80213	1.49058731569898e-09
108227749	SPX and EXS domain-containing protein 1-like isoform X1	1.80213	1.49058731569898e-09
LOC108214128	serine carboxypeptidase-like 17 isoform X1	1.80186	0.00357463293083976
108214128	serine carboxypeptidase-like 17 isoform X1	1.80186	0.00357463293083976
108214128	serine carboxypeptidase-like 17 isoform X1	1.80186	0.00357463293083976
LOC108224802	autophagy-related protein 8C	1.80141	0.00649569854042103
LOC108198304	cytochrome P450 71A1-like	1.80014	8.08478976659967e-06
LOC108199698	telomere repeat-binding protein 4-like	1.79935	0.00153485384911418
LOC108215212	uncharacterized aarF domain-containing protein kinase At1g79600, chloroplastic-like	1.79815	0.00193778761505361
LOC108223110	EPIDERMAL PATTERNING FACTOR-like protein 9	1.79473	0.00982430898496028
LOC108220162	homeobox-leucine zipper protein HOX1-like isoform X1	1.79369	0.000269770745105193
108220162	homeobox-leucine zipper protein HOX1-like isoform X1	1.79369	0.000269770745105193
LOC108224063	fructose-1,6-bisphosphatase, cytosolic	1.79362	6.60418319837778e-05
LOC108215377	nematode resistance protein-like HSPRO2	1.79327	0.00112266933881973
LOC108224946	uncharacterized protein LOC108224946	1.79109	0.00676042139745409
LOC108199777	glycosyltransferase family protein 64 C3	1.78646	0.000489445791223778
LOC108205901	F-box/kelch-repeat protein At1g30090-like	1.78521	0.00169656580915115
108205901	F-box/kelch-repeat protein At1g30090-like	1.78521	0.00169656580915115
108205901	F-box/kelch-repeat protein At1g30090-like	1.78521	0.00169656580915115
108205901	F-box/kelch-repeat protein At1g30090-like	1.78521	0.00169656580915115
LOC108209283	probable LRR receptor-like serine/threonine-protein kinase RFK1 isoform X1	1.78507	0.000171943224256435
108209283	probable LRR receptor-like serine/threonine-protein kinase RFK1 isoform X1	1.78507	0.000171943224256435
108209283	probable LRR receptor-like serine/threonine-protein kinase RFK1 isoform X1	1.78507	0.000171943224256435
108209283	probable LRR receptor-like serine/threonine-protein kinase RFK1 isoform X1	1.78507	0.000171943224256435
LOC108196378	uncharacterized protein LOC108196378 isoform X1	1.78155	1.72673210720986e-05
108196378	uncharacterized protein LOC108196378 isoform X1	1.78155	1.72673210720986e-05
108196378	uncharacterized protein LOC108196378 isoform X1	1.78155	1.72673210720986e-05
LOC108215317	uncharacterized protein LOC108215317	1.78144	0.00692615774093282
LOC108193693	nicotinamide adenine dinucleotide transporter 1, chloroplastic-like isoform X1	1.78121	4.06747724279602e-08
108193693	nicotinamide adenine dinucleotide transporter 1, chloroplastic-like isoform X1	1.78121	4.06747724279602e-08
LOC108223930	BTB/POZ domain-containing protein At2g24240-like	1.7812	0.000693595127411632
LOC108220363	mitochondrial import inner membrane translocase subunit TIM22-3-like	1.78105	0.000597069237108003
LOC108198609	cyclin-dependent kinase G-2-like isoform X1	1.78046	2.43614643045191e-05
108198609	cyclin-dependent kinase G-2-like isoform X1	1.78046	2.43614643045191e-05
LOC108196132	cyclin-dependent kinase F-4-like	1.77879	7.89550957083199e-05
108196132	cyclin-dependent kinase F-4-like	1.77879	7.89550957083199e-05
LOC108227574	uncharacterized protein LOC108227574 isoform X1	1.77662	0.00294725817919152
108227574	uncharacterized protein LOC108227574 isoform X1	1.77662	0.00294725817919152
LOC108206069	uncharacterized protein LOC108206069 isoform X1	1.77506	6.68828438953412e-05
108206069	uncharacterized protein LOC108206069 isoform X1	1.77506	6.68828438953412e-05
108206069	uncharacterized protein LOC108206069 isoform X1	1.77506	6.68828438953412e-05
108206069	uncharacterized protein LOC108206069 isoform X1	1.77506	6.68828438953412e-05
108206069	uncharacterized protein LOC108206069 isoform X1	1.77506	6.68828438953412e-05
108206069	uncharacterized protein LOC108206069 isoform X1	1.77506	6.68828438953412e-05
LOC108210656	NAC domain-containing protein 72-like	1.77383	0.00912342120566919
LOC108215929	UDP-glycosyltransferase 91A1-like	1.76767	0.00359367324686127
LOC108197997	bifunctional protein FolD 1, mitochondrial-like isoform X1	1.76721	0.00047526973210782
108197997	bifunctional protein FolD 1, mitochondrial-like isoform X1	1.76721	0.00047526973210782
108197997	bifunctional protein FolD 1, mitochondrial-like isoform X1	1.76721	0.00047526973210782
LOC108196342	uncharacterized protein LOC108196342	1.76252	0.00425332860272005
108196342	uncharacterized protein LOC108196342	1.76252	0.00425332860272005
LOC108210613	mannan endo-1,4-beta-mannosidase 7-like	1.76118	0.00245965532451451
LOC108198275	la-related protein 6A	1.7598	0.000793206136106593
LOC108211883	1-phosphatidylinositol 4,5-bisphosphate phosphodiesterase epsilon-1-like	1.75941	0.00651952320456573
NA	NA	1.74917	3.39884612240338e-09
LOC108200023	mucin-5AC-like	1.74903	9.60204159424101e-06
LOC108223138	ubiquitin-conjugating enzyme E2 36-like	1.74874	0.00775519714870791
LOC108199911	homogentisate 1,2-dioxygenase	1.74855	0.000230134124347076
LOC108222806	putative lysine-specific demethylase JMJ16	1.74692	0.00197444448010451
LOC108224139	uncharacterized protein LOC108224139	1.74675	0.00151816495827095
LOC108211540	uncharacterized protein LOC108211540	1.74666	0.0066232945645225
LOC108206260	pelargonidin 3-O-(6-caffeoylglucoside) 5-O-(6-O-malonylglucoside) 4\\'\\'\\'-malonyltransferase-like	1.74491	0.00102008577246523
LOC108205914	probable protein phosphatase 2C 25	1.7441	0.00524370104600594
NA	NA	1.74058	0.000137856021333048
LOC108224537	peptide methionine sulfoxide reductase-like	1.73564	0.00252663557330088
LOC108197046	uncharacterized protein LOC108197046	1.73376	0.00556731173862163
LOC108224475	putative F-box protein PP2-B12	1.73191	0.00235014918942322
LOC108210555	AAA-ATPase At2g46620-like	1.73133	0.000583838767450057
LOC108217935	uncharacterized protein At1g04910	1.72818	0.000809379720638835
LOC108198608	cyclin-dependent kinase G-2-like isoform X1	1.72632	1.5379181753494e-05
108198608	cyclin-dependent kinase G-2-like isoform X1	1.72632	1.5379181753494e-05
LOC108214706	uncharacterized protein LOC108214706	1.7258	3.0533894753165e-07
LOC108217946	isoflavone reductase homolog	1.72535	0.000693595127411632
LOC108196008	uncharacterized protein LOC108196008	1.72293	0.00507245988666923
LOC108217565	uridine kinase-like protein 1, chloroplastic	1.72249	0.00841809504258027
LOC108228125	uncharacterized protein LOC108228125	1.72229	0.000993795311985076
LOC108214694	lanC-like protein GCL1	1.71733	7.53470556997236e-07
LOC108209197	copper transporter 5.1	1.71613	0.000279313965911769
NA	NA	1.71478	0.000130664257513176
LOC108194682	uncharacterized protein LOC108194682	1.71135	0.00199741264096135
LOC108200265	uncharacterized protein LOC108200265	1.71053	0.000750832853151918
LOC108219330	zinc finger A20 and AN1 domain-containing stress-associated protein 8-like	1.71022	8.1220957896258e-06
108219330	zinc finger A20 and AN1 domain-containing stress-associated protein 8-like	1.71022	8.1220957896258e-06
LOC108219127	uncharacterized protein LOC108219127	1.71013	0.000131322233637776
LOC108196400	probable glutathione S-transferase	1.70912	1.58408698881928e-05
LOC108215257	probable E3 ubiquitin-protein ligase RHC2A	1.70837	0.00310563107251558
LOC108205131	prostatic spermine-binding protein	1.70812	0.00142167140250292
108205131	prostatic spermine-binding protein	1.70812	0.00142167140250292
NA	NA	1.70016	2.16303133014096e-05
LOC108222204	NEDD8-specific protease 1-like	1.69636	0.00949268665673504
NA	NA	1.68934	0.00265229181027724
LOC108227419	probable E3 ubiquitin-protein ligase XERICO	1.68853	0.00502681457624811
LOC108199883	uncharacterized protein LOC108199883	1.68809	0.00688637783075193
LOC108220512	DNA-directed RNA polymerase III subunit rpc4-like	1.68672	0.00112449277461677
LOC108218571	probable mediator of RNA polymerase II transcription subunit 26b	1.68599	0.00430489740766094
LOC108196906	translationally-controlled tumor protein homolog	1.68391	0.00194098785305682
LOC108215595	GEM-like protein 5	1.68053	1.77577769256743e-05
LOC108214191	uncharacterized protein LOC108214191	1.68041	0.00313219412782817
LOC108214598	cucumisin-like	1.67928	0.00690782538290254
LOC108212183	uncharacterized protein LOC108212183	1.67833	0.000783082478427209
LOC108215433	putative F-box protein At1g67390 isoform X1	1.67578	1.02569994250404e-06
108215433	putative F-box protein At1g67390 isoform X1	1.67578	1.02569994250404e-06
108215433	putative F-box protein At1g67390 isoform X1	1.67578	1.02569994250404e-06
108215433	putative F-box protein At1g67390 isoform X1	1.67578	1.02569994250404e-06
108215433	putative F-box protein At1g67390 isoform X1	1.67578	1.02569994250404e-06
LOC108205809	plant cysteine oxidase 2-like	1.67467	0.00216021893781964
LOC108223364	omega-6 fatty acid desaturase, chloroplastic isoform X1	1.66797	3.7308727533158e-05
108223364	omega-6 fatty acid desaturase, chloroplastic isoform X1	1.66797	3.7308727533158e-05
LOC108215773	deSI-like protein At4g17486	1.6667	0.000118196891237741
LOC108203164	uncharacterized protein LOC108203164	1.66654	0.00523836271617967
LOC108202432	putative E3 ubiquitin-protein ligase XBAT35 isoform X1	1.66434	3.5003657650044e-05
108202432	putative E3 ubiquitin-protein ligase XBAT35 isoform X1	1.66434	3.5003657650044e-05
LOC108220103	uncharacterized protein LOC108220103	1.6643	0.00392289693189251
LOC108197279	epidermis-specific secreted glycoprotein EP1-like	1.65999	0.00430489740766094
LOC108215483	uncharacterized protein LOC108215483	1.65966	0.00720938768623754
LOC108216115	histone H4	1.65954	0.000698309164852559
LOC108209345	putative multidrug resistance protein	1.65672	0.00494921691407538
LOC108192790	vacuolar protein 8	1.65597	0.000720498134458731
LOC108198250	uncharacterized protein LOC108198250	1.6553	0.00871828857827478
LOC108197175	cysteine-rich receptor-like protein kinase 2	1.65471	0.00482282807709246
108197175	cysteine-rich receptor-like protein kinase 2	1.65471	0.00482282807709246
LOC108214866	NAC domain-containing protein 91-like	1.65429	0.000751829679105768
LOC108217666	heat stress transcription factor A-4b-like	1.65266	0.00414876765679365
LOC108213744	uncharacterized protein LOC108213744	1.65025	0.00438944877176233
LOC108197495	uncharacterized protein LOC108197495	1.64934	0.00508573239384707
LOC108199688	la-related protein 6B isoform X1	1.64833	0.000118196891237741
108199688	la-related protein 6B isoform X1	1.64833	0.000118196891237741
LOC108220431	succinate dehydrogenase assembly factor 1, mitochondrial-like	1.64696	0.00186222259759671
108220431	succinate dehydrogenase assembly factor 1, mitochondrial-like	1.64696	0.00186222259759671
LOC108218910	type IV inositol polyphosphate 5-phosphatase 3-like isoform X1	1.64524	1.20939726055273e-06
108218910	type IV inositol polyphosphate 5-phosphatase 3-like isoform X1	1.64524	1.20939726055273e-06
108218910	type IV inositol polyphosphate 5-phosphatase 3-like isoform X1	1.64524	1.20939726055273e-06
108218910	type IV inositol polyphosphate 5-phosphatase 3-like isoform X1	1.64524	1.20939726055273e-06
108218910	type IV inositol polyphosphate 5-phosphatase 3-like isoform X1	1.64524	1.20939726055273e-06
108218910	type IV inositol polyphosphate 5-phosphatase 3-like isoform X1	1.64524	1.20939726055273e-06
108218910	type IV inositol polyphosphate 5-phosphatase 3-like isoform X1	1.64524	1.20939726055273e-06
LOC108196745	probable E3 ubiquitin-protein ligase LUL4	1.6403	0.000322084625178127
LOC108214864	cellulose synthase-like protein E1	1.64006	0.00809019726107688
LOC108206698	vesicle transport protein GOT1B-like	1.63993	1.84491413121133e-07
108206698	vesicle transport protein GOT1B-like	1.63993	1.84491413121133e-07
108206698	vesicle transport protein GOT1B-like	1.63993	1.84491413121133e-07
LOC108205377	chloride channel protein CLC-b-like	1.63594	0.00442722002729666
LOC108199788	uncharacterized protein LOC108199788 isoform X1	1.63365	0.000901777226376497
108199788	uncharacterized protein LOC108199788 isoform X1	1.63365	0.000901777226376497
LOC108201202	uncharacterized protein LOC108201202	1.63205	1.86286570211599e-05
LOC108219086	phosphatidylinositol 4-kinase gamma 7-like	1.63019	0.00952499087957261
108219086	phosphatidylinositol 4-kinase gamma 7-like	1.63019	0.00952499087957261
LOC108200018	uncharacterized protein At1g04910-like	1.62939	0.000943539879095971
LOC108208976	probable ubiquitin-conjugating enzyme E2 24	1.6288	0.00290030750662608
108208976	probable ubiquitin-conjugating enzyme E2 24	1.6288	0.00290030750662608
LOC108218402	uncharacterized protein LOC108218402	1.62873	0.00480848840772108
LOC108218408	uncharacterized protein LOC108218408	1.62873	0.00480848840772108
LOC108210531	actin-104-like	1.62816	0.00305074264077533
LOC108214488	autophagy-related protein 11-like	1.62622	0.00169703337584182
LOC108203703	uncharacterized protein LOC108203703	1.62545	0.000115475182092821
NA	NA	1.62408	2.84848391070443e-05
LOC108193222	SUMO-conjugating enzyme SCE1-like	1.61888	0.00202302397433722
LOC108197397	protein NLRC3-like	1.61378	0.00941194691094524
LOC108214332	formin-like protein 5	1.61354	0.000364758652741249
LOC108200313	bZIP transcription factor 53-like	1.61087	0.00221496433499442
LOC108211733	hemK methyltransferase family member 2 isoform X1	1.5991	0.00537158636156858
108211733	hemK methyltransferase family member 2 isoform X1	1.5991	0.00537158636156858
108211733	hemK methyltransferase family member 2 isoform X1	1.5991	0.00537158636156858
108211733	hemK methyltransferase family member 2 isoform X1	1.5991	0.00537158636156858
108211733	hemK methyltransferase family member 2 isoform X1	1.5991	0.00537158636156858
LOC108204321	uncharacterized protein LOC108204321	1.59727	0.00645025515600086
LOC108197076	beta-1,4-mannosyl-glycoprotein 4-beta-N-acetylglucosaminyltransferase-like	1.59517	2.3611277014271e-05
LOC108215731	heat stress transcription factor B-2a-like	1.59143	0.000969572504633647
LOC108219792	RNA-binding protein 24	1.59117	1.04455743678376e-05
LOC108223442	uncharacterized protein LOC108223442	1.58947	0.00137915857122217
LOC108219772	uncharacterized protein LOC108219772	1.58678	0.00265603633044287
LOC108214668	beta-glucuronosyltransferase GlcAT14B-like	1.58634	0.00371743386819566
LOC108192969	uncharacterized protein LOC108192969	1.58568	0.0013091899984789
LOC108196148	short-chain dehydrogenase TIC 32, chloroplastic-like	1.58534	0.00902235596916417
LOC108211788	2-oxoisovalerate dehydrogenase subunit beta 1, mitochondrial	1.58506	4.67390346562979e-05
LOC108205095	E3 ubiquitin-protein ligase CHIP	1.58322	1.55592121104311e-06
LOC108209910	scarecrow-like protein 13	1.57957	0.00383004704334497
LOC108199509	mediator of RNA polymerase II transcription subunit 22a-like	1.57417	6.14422621033565e-05
108199509	mediator of RNA polymerase II transcription subunit 22a-like	1.57417	6.14422621033565e-05
LOC108225723	protein CYPRO4	1.57282	3.84984162662662e-07
LOC108221132	uncharacterized protein LOC108221132	1.57208	0.00559416736541023
LOC108216263	probable WRKY transcription factor 17	1.56894	0.00148591560552943
LOC108197407	haloacid dehalogenase-like hydrolase domain-containing protein 3	1.5676	0.00030570600015861
LOC108212276	protein PLANT CADMIUM RESISTANCE 10	1.56565	0.00423234398689249
LOC108215625	zinc finger CCCH domain-containing protein 48-like	1.5652	0.00139730649779574
LOC108223328	C2 and GRAM domain-containing protein At5g50170	1.56477	1.22801873201569e-06
LOC108199392	ultraviolet-B receptor UVR8 isoform X1	1.56447	0.00192903439184817
108199392	ultraviolet-B receptor UVR8 isoform X1	1.56447	0.00192903439184817
108199392	ultraviolet-B receptor UVR8 isoform X1	1.56447	0.00192903439184817
108199392	probable E3 ubiquitin-protein ligase HERC4 isoform X1	1.56447	0.00192903439184817
LOC108200119	lipoamide acyltransferase component of branched-chain alpha-keto acid dehydrogenase complex, mitochondrial	1.56361	0.00102180654078967
LOC108214687	serine/threonine-protein kinase At5g01020-like	1.56335	0.00882461375991075
LOC108223736	D-2-hydroxyglutarate dehydrogenase, mitochondrial isoform X1	1.56194	0.000943030300778528
LOC108225019	uncharacterized protein LOC108225019	1.55901	0.0055404139402011
LOC108212728	alpha-aminoadipic semialdehyde synthase-like	1.55843	0.00524724171482385
LOC108199876	scarecrow-like protein 13	1.55741	2.37187475100042e-05
LOC108210610	polyadenylate-binding protein-interacting protein 12-like	1.55712	0.00355160493801632
LOC108215165	ninja-family protein AFP3-like	1.55598	0.00145664075066851
LOC108196911	SNAP25 homologous protein SNAP33	1.55148	0.00231966738652568
LOC108202767	probable receptor-like protein kinase At5g47070	1.54992	0.00466774419672585
LOC108203396	uncharacterized protein LOC108203396 isoform X1	1.54549	0.000406170270528094
LOC108214701	prosaposin-like	1.54336	0.00192903439184817
LOC108217093	uncharacterized protein LOC108217093	1.54327	0.00391604458211807
LOC108223253	calcium uniporter protein 6, mitochondrial-like	1.54245	6.97781325574848e-06
LOC108193969	PRA1 family protein F3-like	1.54047	0.00438944877176233
LOC108219425	ankyrin repeat-containing protein At5g02620-like	1.53915	0.000873544212995075
LOC108204816	alkaline/neutral invertase A, mitochondrial-like	1.53905	0.008494516964126
LOC108200385	uncharacterized protein LOC108200385	1.53388	0.00694471818127315
LOC108204468	sugar phosphatase YfbT-like	1.53246	0.00243513215501815
LOC108217092	uncharacterized protein LOC108217092	1.53241	0.00422496793761521
LOC108226189	replication protein A 70 kDa DNA-binding subunit D-like	1.53103	0.00331129944801318
LOC108222786	F-box protein CPR30-like	1.52959	0.000525441363870593
LOC108210372	putative F-box protein At3g23960	1.52908	0.00395701528292494
LOC108214427	tetraketide alpha-pyrone reductase 1-like	1.52781	0.00305446009982879
LOC108215525	RHOMBOID-like protein 3	1.52611	0.00285114152196814
LOC108209220	F-box protein SKIP14	1.52421	0.00482655533633805
LOC108214448	F-box protein CPR30-like	1.52386	0.0065276004330458
LOC108210506	uncharacterized protein LOC108210506	1.52201	0.00132008933775482
LOC108206478	nodulation protein H isoform X1	1.52084	0.000296037039651175
LOC108214965	cyclic nucleotide-gated ion channel 1	1.51282	0.00452416022592947
LOC108227781	delta(12)-fatty-acid desaturase FAD2-like	1.5125	0.000532382909635099
LOC108216107	isoflavone reductase homolog	1.51046	0.00491300144488147
LOC108209745	DPH4 homolog	1.51033	0.000538884379023269
LOC108213988	replication protein A 70 kDa DNA-binding subunit C-like	1.50883	0.00834510235445387
LOC108209632	ATG8-interacting protein 2-like	1.50644	0.00213165561312507
LOC108204518	triacylglycerol lipase 1	1.50436	0.000983679305983834
LOC108200036	uncharacterized protein LOC108200036 isoform X1	1.50385	0.00344866919874427
LOC108202950	methyltransferase-like protein 13	1.50379	4.33605480935366e-06
LOC108204559	dihydropyrimidine dehydrogenase (NADP(+)), chloroplastic	1.50377	0.00561879181812041
LOC108199389	ENHANCER OF AG-4 protein 2 isoform X1	1.50227	0.00249281219594072
LOC108225795	protein disulfide-isomerase SCO2	1.4983	0.00403211092834446
LOC108210141	F-box/kelch-repeat protein At3g23880-like	1.49592	0.00230597791381375
LOC108227948	serine/threonine-protein kinase HT1	1.49561	0.000334969474128484
LOC108205953	uricase-2	1.49282	0.00541144310924501
LOC108193366	uncharacterized protein LOC108193366	1.48898	0.00854242702158069
LOC108205175	serine/threonine-protein kinase STY46-like	1.4869	0.00200381989958801
LOC108223100	F-box protein At1g78280	1.4867	0.000285550989384397
LOC108226021	cyclin-T1-4-like isoform X1	1.48582	0.000155911064812873
LOC108205693	E3 ubiquitin-protein ligase RDUF2	1.48185	0.000221669355198007
LOC108204760	phospholipid-transporting ATPase 2-like isoform X1	1.48145	0.000589095825622438
LOC108209032	mediator of RNA polymerase II transcription subunit 15a-like	1.48136	2.37187475100042e-05
LOC108227390	ubiquitin receptor RAD23d-like isoform X1	1.47792	0.00594272182772675
LOC108194558	uncharacterized protein LOC108194558	1.47586	0.00422181103405182
LOC108214948	telomere repeat-binding protein 4	1.47109	0.00904961280521269
LOC108227981	OTU domain-containing protein DDB_G0284757	1.46892	0.000900662661826207
LOC108201848	uncharacterized protein LOC108201848 isoform X1	1.46759	0.00245743268057077
LOC108224863	uncharacterized protein LOC108224863	1.46674	0.00284961221939825
LOC108214862	uncharacterized protein LOC108214862 isoform X1	1.46376	0.000346405493079169
LOC108192904	thioredoxin reductase NTRC	1.46276	0.00540697104364193
LOC108218312	5\\'-adenylylsulfate reductase-like 5	1.45884	0.00112274597216432
LOC108204532	uncharacterized protein LOC108204532	1.45729	0.00604167130174363
LOC108214473	poly(ADP-ribose) glycohydrolase 1-like	1.45397	0.00170343378846981
LOC108199912	uncharacterized protein LOC108199912	1.44507	0.000542692672874533
LOC108195940	auxin response factor 2-like	1.44134	0.00302955457317724
LOC108227950	DNA polymerase zeta catalytic subunit isoform X1	1.43355	0.000426747899596426
LOC108208902	myosin-9-like isoform X1	1.43039	0.000215177139468522
LOC108223740	WPP domain-interacting protein 1-like	1.42443	0.00260953400092148
LOC108200095	phosphatidylinositol:ceramide inositolphosphotransferase 2	1.41794	0.000741006486875912
LOC108216309	protein WVD2-like 4	1.4155	0.000693595127411632
LOC108217263	uncharacterized protein LOC108217263	1.41471	0.00382710255617046
LOC108208217	transcription factor MYB108	1.41386	0.00116510765411516
LOC108214220	protein DETOXIFICATION 27-like	1.41185	0.000751829679105768
LOC108206077	lipid transfer protein EARLI 1-like	1.41176	0.000326518030275925
LOC108204561	uncharacterized protein LOC108204561	1.41162	0.000562157266899728
LOC108209691	F-box protein PP2-A12-like	1.41055	0.00201356781538423
LOC108216074	homeobox-leucine zipper protein HOX1-like isoform X1	1.40902	0.00423398701029308
LOC108202195	putative F-box protein At3g16210	1.40838	0.00850510934512087
LOC108224270	GATA transcription factor 24-like isoform X1	1.40507	0.000630415671357587
LOC108196087	uncharacterized acetyltransferase At3g50280-like	1.40444	0.00442722002729666
LOC108196725	ubiquitin receptor RAD23d-like isoform X1	1.40342	0.000553756593613543
LOC108213421	uncharacterized protein LOC108213421	1.40101	0.00102180654078967
LOC108213929	uncharacterized protein LOC108213929	1.40033	0.00952274918570647
LOC108204796	F-box protein SKP2A-like	1.39796	0.00766125495782885
LOC108211000	uncharacterized protein LOC108211000 isoform X1	1.39773	0.0063921772756045
LOC108206180	DET1- and DDB1-associated protein 1	1.39353	0.000793206136106593
LOC108212685	protein DETOXIFICATION 27-like	1.39216	0.000698290256492467
LOC108218563	BTB/POZ domain-containing protein At2g30600	1.39112	0.00222285193221032
LOC108199330	uncharacterized protein LOC108199330 isoform X1	1.38928	0.00617078073794094
LOC108200585	serine carboxypeptidase-like 17	1.3879	0.00405823541601007
LOC108223499	uncharacterized protein LOC108223499	1.38673	0.00655361711548059
LOC108227581	LOW QUALITY PROTEIN: protein HOMOLOG OF MAMMALIAN LYST-INTERACTING PROTEIN 5-like	1.38499	0.00979712272750678
LOC108218988	uncharacterized protein LOC108218988 isoform X1	1.38458	0.000390971512236332
LOC108200927	uncharacterized protein LOC108200927	1.38364	0.00315039490577947
LOC108206752	PHD finger-like domain-containing protein 5B	1.38196	0.00410223047929131
LOC108197250	F-box/kelch-repeat protein At3g23880-like	1.38181	0.00213980201600857
LOC108195997	uncharacterized protein LOC108195997	1.37846	0.00814451685509615
LOC108205850	deSI-like protein At4g17486	1.37682	0.000950051893508058
LOC108216562	uncharacterized protein LOC108216562	1.37611	0.00336772025996717
LOC108196869	protein MOS2-like	1.36814	0.000165489226943444
LOC108197685	trihelix transcription factor GTL1	1.36389	0.00524724171482385
LOC108214869	E3 ubiquitin-protein ligase SINAT3-like	1.36299	0.00128105093355202
LOC108223152	hornerin-like isoform X1	1.36162	0.000421243790588528
LOC108200045	chromatin modification-related protein eaf-1-like	1.36152	0.000223303466841826
LOC108228103	1-deoxy-D-xylulose 5-phosphate reductoisomerase-like	1.36145	0.00428465603370325
LOC108223878	uncharacterized protein LOC108223878	1.3608	0.00877827410728138
LOC108207244	cell division control protein 15-like	1.35899	0.000450487055442092
LOC108220416	probable protein phosphatase 2C 27	1.3587	0.000391311361264876
LOC108194121	glutaredoxin	1.35827	0.00459888189191726
LOC108194392	ENHANCER OF AG-4 protein 2-like	1.35725	3.5003657650044e-05
LOC108227972	polyubiquitin	1.35155	0.000240743316576151
LOC108218364	mitogen-activated protein kinase kinase kinase 1-like	1.35137	0.00214525760241358
LOC108197451	uncharacterized protein LOC108197451	1.35064	0.000686927883993647
LOC108213739	protein KAKU4-like isoform X1	1.34841	0.00587220380428826
LOC108214782	mediator of RNA polymerase II transcription subunit 15	1.34052	0.00425584768766262
LOC108222999	serpin-ZX-like	1.34048	0.00211546920355758
LOC108227628	mitogen-activated protein kinase 19-like	1.33717	0.00183557798914426
LOC108228070	sulfite oxidase	1.33601	0.00841861975913463
LOC108199112	2-hydroxy-6-oxononadienedioate/2-hydroxy-6-oxononatrienedioate hydrolase-like	1.33501	0.0088844236319511
LOC108209196	uncharacterized protein LOC108209196	1.33495	3.20803571563319e-05
LOC108200186	serine/threonine-protein phosphatase PP1 isozyme 9	1.33457	0.00255381844684449
LOC108195985	nuclear poly(A) polymerase 4-like	1.33397	0.000445958238253607
LOC108197695	probable LRR receptor-like serine/threonine-protein kinase PAM74	1.33238	0.00769437481267151
LOC108204963	uncharacterized protein LOC108204963	1.32863	0.00260953400092148
LOC108209349	polyubiquitin-like	1.32851	0.0029334628973229
LOC108208098	probable protein phosphatase 2C 2	1.32792	2.44956773931315e-06
LOC108205689	ornithine aminotransferase, mitochondrial	1.32724	0.00660035853086722
LOC108201786	uncharacterized protein LOC108201786 isoform X1	1.3266	0.000663502345312214
LOC108214290	uncharacterized protein LOC108214290	1.32559	0.00291744999535558
LOC108223480	uncharacterized protein LOC108223480 isoform X1	1.32333	5.24225631341595e-06
LOC108220395	UMP-CMP kinase isoform X1	1.32324	0.000940979884644103
LOC108195114	proline synthase co-transcribed bacterial homolog protein-like	1.31052	0.00227547334445878
LOC108218418	beta-galactosidase 10-like isoform X1	1.30852	0.0081893266506443
LOC108199680	uncharacterized protein LOC108199680	1.30477	0.00807480045861524
LOC108219744	probable protein phosphatase 2C 27	1.30184	0.00122751456548645
LOC108216390	uncharacterized protein LOC108216390	1.29955	0.000374920045042697
LOC108195892	U-box domain-containing protein 4-like	1.29469	0.00729135291753541
LOC108208855	uncharacterized protein LOC108208855 isoform X1	1.29387	0.00934341707112498
108208855	uncharacterized protein LOC108208855 isoform X1	1.29387	0.00934341707112498
108208855	uncharacterized protein LOC108208855 isoform X1	1.29387	0.00934341707112498
108208855	uncharacterized protein LOC108208855 isoform X1	1.29387	0.00934341707112498
LOC108219517	cytochrome P450 71D10-like isoform X1	1.287	0.00042244033150703
108219517	cytochrome P450 71D10-like isoform X1	1.287	0.00042244033150703
LOC108214590	ATP-dependent zinc metalloprotease FTSH 8, mitochondrial-like	1.28661	0.00143280523343693
LOC108203062	protoheme IX farnesyltransferase, mitochondrial	1.28654	5.09527430575717e-06
LOC108210024	heat stress transcription factor A-4c-like	1.28159	0.00227671029063911
108210024	heat stress transcription factor A-4c-like	1.28159	0.00227671029063911
108210024	heat stress transcription factor A-4c-like	1.28159	0.00227671029063911
LOC108219028	GDP-L-galactose phosphorylase 2-like	1.27993	0.00097161771721831
LOC108202888	sodium/hydrogen exchanger 2-like	1.27919	0.000901777226376497
LOC108200314	cyclic dof factor 1-like	1.27638	0.00169656580915115
LOC108193264	uncharacterized protein LOC108193264	1.27634	0.00369443033638068
LOC108204456	pre-mRNA-splicing factor CWC22 homolog	1.27116	0.00676179098452598
LOC108215969	mitochondrial import inner membrane translocase subunit TIM14-1-like	1.27089	0.00757418259466693
LOC108218640	protein SMG7-like	1.26891	0.0042238920612808
LOC108215918	putative serine/threonine-protein kinase	1.2659	0.00554284962132632
108215918	putative serine/threonine-protein kinase	1.2659	0.00554284962132632
108215918	putative serine/threonine-protein kinase	1.2659	0.00554284962132632
108215918	putative serine/threonine-protein kinase	1.2659	0.00554284962132632
LOC108199794	ubiquitin receptor RAD23d-like	1.265	0.000709854193925008
LOC108199683	electron transfer flavoprotein-ubiquinone oxidoreductase, mitochondrial	1.26385	0.00825534454323606
LOC108206918	F-box protein At1g61340-like	1.25983	4.73611860794425e-05
LOC108209388	uncharacterized protein LOC108209388	1.25589	0.000159831863851316
108209388	uncharacterized protein LOC108209388	1.25589	0.000159831863851316
LOC108205265	CBL-interacting serine/threonine-protein kinase 1	1.25523	0.00338253912464512
LOC108210060	uncharacterized protein LOC108210060	1.25521	0.00253781076337265
LOC108199948	putative dual specificity protein phosphatase DSP8	1.25431	0.00127256281598943
LOC108213384	uncharacterized protein LOC108213384	1.2539	0.00929922596085552
LOC108212999	uncharacterized protein LOC108212999	1.25148	0.00406766446675729
LOC108222014	BEACH domain-containing protein B-like isoform X1	1.25112	0.00373594968816721
108222014	BEACH domain-containing protein B-like isoform X1	1.25112	0.00373594968816721
108222014	BEACH domain-containing protein B-like isoform X1	1.25112	0.00373594968816721
108222014	BEACH domain-containing protein B-like isoform X1	1.25112	0.00373594968816721
108222014	BEACH domain-containing protein B-like isoform X1	1.25112	0.00373594968816721
108222014	BEACH domain-containing protein B-like isoform X1	1.25112	0.00373594968816721
108222014	BEACH domain-containing protein B-like isoform X1	1.25112	0.00373594968816721
LOC108220555	calcineurin subunit B-like	1.2502	0.00844662745634744
LOC108199557	phosphopantothenate--cysteine ligase 1-like isoform X1	1.24939	0.00220319893557544
LOC108223172	F-box protein SKIP1	1.24409	0.00706673464592926
LOC108193435	ribosomal L1 domain-containing protein CG13096	1.24096	0.00896282464583876
LOC108214666	ubiquitin-conjugating enzyme E2 2-like	1.23952	0.000822168623670572
LOC108219226	DIS3-like exonuclease 2	1.2379	0.000575371955430608
LOC108205021	plasma membrane-associated cation-binding protein 1	1.23737	0.00876720961360139
LOC108225073	nuclear poly(A) polymerase 1-like isoform X1	1.23551	0.0093093961715065
LOC108197679	crocetin glucosyltransferase, chloroplastic-like	1.22947	0.00458558302390146
LOC108225918	CBL-interacting serine/threonine-protein kinase 4-like	1.22844	0.00560531366319106
LOC108206797	E3 ubiquitin protein ligase DRIP2-like	1.22768	0.00652431937231303
LOC108224795	uncharacterized protein LOC108224795	1.22651	0.0056117189275277
LOC108196702	galactokinase-like	1.22597	0.00104759087646346
LOC108202772	F-box/LRR-repeat protein 4	1.22443	0.00415643719190544
LOC108198678	2-hydroxy-6-oxononadienedioate/2-hydroxy-6-oxononatrienedioate hydrolase-like	1.21705	0.00015337623313874
LOC108220033	uncharacterized protein LOC108220033	1.21094	0.0076931451945787
LOC108218607	uncharacterized protein LOC108218607 isoform X1	1.20919	2.40195931794633e-05
LOC108218871	CLP protease regulatory subunit CLPX1, mitochondrial-like isoform X1	1.20832	0.000787007972147738
LOC108223451	VIN3-like protein 2	1.20588	0.00402748595196279
LOC108208437	bidirectional sugar transporter SWEET2a-like	1.20167	0.000691951668306195
LOC108197463	histidine triad nucleotide-binding protein 3	1.19939	0.000205365308108708
LOC108227690	uncharacterized protein LOC108227690	1.1959	0.00411135928593988
LOC108224958	uncharacterized F-box/LRR-repeat protein C02F5.7	1.19563	0.00595778593364577
LOC108219866	tubby-like F-box protein 5	1.19355	0.00358184525000487
LOC108193064	nuclear speckle RNA-binding protein A-like	1.19133	0.00563603515459339
LOC108217657	thioredoxin-like	1.19013	0.000418776679977647
LOC108214149	uncharacterized protein LOC108214149	1.1821	0.000891568402492219
LOC108219238	uncharacterized protein LOC108219238	1.18151	8.64645168328192e-06
LOC108202703	uncharacterized protein LOC108202703	1.18127	0.00871828857827478
LOC108218852	ubiquitin carboxyl-terminal hydrolase 16 isoform X1	1.17962	0.000829485407901045
LOC108200328	CDP-diacylglycerol--serine O-phosphatidyltransferase 1	1.17835	0.00179056131202264
LOC108210034	protein EMBRYONIC FLOWER 1-like	1.17767	0.000695387908144695
LOC108210083	light-inducible protein CPRF2	1.1774	0.00493492756314068
LOC108203130	RHOMBOID-like protein 10, chloroplastic isoform X1	1.17724	0.00103939593290194
LOC108226327	uncharacterized protein LOC108226327	1.17589	0.00250762417955008
LOC108222973	glutathione S-transferase L3-like isoform X1	1.17578	0.00167514624910128
LOC108219026	PHD finger protein At1g33420 isoform X1	1.17302	0.00729135291753541
LOC108201370	SCY1-like protein 2	1.1715	0.00114699829806842
LOC108193569	mitochondrial carrier protein LEU5 isoform X1	1.16867	0.00843685112871682
LOC108208912	uncharacterized protein LOC108208912 isoform X1	1.16722	0.00560531366319106
LOC108202981	DNA repair protein REV1	1.16682	0.0094359726523925
LOC108203274	protein SAWADEE HOMEODOMAIN HOMOLOG 1-like isoform X1	1.16532	0.00422243668138803
LOC108195127	lisH domain and HEAT repeat-containing protein KIAA1468	1.16431	0.00932929327054856
LOC108205529	zinc finger protein ZAT10-like	1.16406	0.00449167401716746
LOC108201754	peptidyl-prolyl cis-trans isomerase CYP22	1.16286	0.00929767571265205
LOC108195999	protein RMD5 homolog A	1.16125	0.000482343652930462
LOC108215849	cytochrome P450 CYP82D47-like	1.15789	0.00429054691745715
LOC108203060	uncharacterized protein LOC108203060	1.15511	0.00549962066765395
LOC108196588	U-box domain-containing protein 5	1.15135	0.00247483214713031
108196588	U-box domain-containing protein 5	1.15135	0.00247483214713031
LOC108199633	casein kinase I isoform X1	1.14587	0.00246856157879515
108199633	casein kinase I isoform X1	1.14587	0.00246856157879515
LOC108209063	uncharacterized protein LOC108209063 isoform X1	1.14301	0.00690449903374681
108209063	uncharacterized protein LOC108209063 isoform X1	1.14301	0.00690449903374681
LOC108214799	protein NRDE2 homolog isoform X1	1.14244	0.00586677435356797
108214799	protein NRDE2 homolog isoform X1	1.14244	0.00586677435356797
108214799	protein NRDE2 homolog isoform X1	1.14244	0.00586677435356797
LOC108219865	uncharacterized protein LOC108219865	1.14085	0.0021138405315127
LOC108214984	regulatory protein NPR1	1.1408	0.00194098785305682
LOC108223002	putative GTP diphosphokinase RSH1, chloroplastic isoform X1	1.14019	0.00893621545835297
108223002	putative GTP diphosphokinase RSH1, chloroplastic isoform X1	1.14019	0.00893621545835297
LOC108196666	eukaryotic peptide chain release factor subunit 1-3	1.1345	0.00298665437882517
108196666	eukaryotic peptide chain release factor subunit 1-3	1.1345	0.00298665437882517
LOC108204648	probable receptor-like protein kinase At5g47070	1.13262	0.00527069155900984
LOC108227343	formin-like protein 20 isoform X1	1.13029	0.00201356781538423
108227343	formin-like protein 20 isoform X1	1.13029	0.00201356781538423
LOC108219258	WD and tetratricopeptide repeats protein 1	1.12982	0.00240044080269623
108219258	WD and tetratricopeptide repeats protein 1	1.12982	0.00240044080269623
108219258	WD and tetratricopeptide repeats protein 1	1.12982	0.00240044080269623
LOC108210941	glucosidase 2 subunit beta	1.12675	0.00383176943330722
LOC108200742	MACPF domain-containing protein At1g14780	1.12595	0.000982033795318531
LOC108218996	target of Myb protein 1-like	1.12223	0.000123232599710012
LOC108204893	prolycopene isomerase, chloroplastic	1.12105	0.0056117189275277
108204893	prolycopene isomerase, chloroplastic	1.12105	0.0056117189275277
LOC108219079	TBC1 domain family member 15	1.12009	0.00285543805952888
LOC108219711	uncharacterized protein LOC108219711 isoform X1	1.11481	0.000219910003191426
108219711	uncharacterized protein LOC108219711 isoform X1	1.11481	0.000219910003191426
108219711	uncharacterized protein LOC108219711 isoform X1	1.11481	0.000219910003191426
LOC108206397	inositol 2-dehydrogenase 2	1.11304	0.000987953772528079
LOC108224637	sorcin-like	1.10969	0.00130155631978278
LOC108210221	protein HAIKU1-like	1.10699	0.00559416736541023
LOC108204091	topless-related protein 3-like	1.10337	0.00725105302024611
LOC108209689	U-box domain-containing protein 14	1.09822	0.00898100582132294
LOC108199498	phospholipid-transporting ATPase 3	1.09511	0.000928056490995235
LOC108218524	cell division control protein 48 homolog E	1.09404	0.00718285082284942
LOC108218660	transcription factor GTE4-like isoform X1	1.09187	0.00876201172627973
108218660	transcription factor GTE4-like isoform X1	1.09187	0.00876201172627973
LOC108204354	copper-transporting ATPase RAN1-like	1.08784	0.000449976994053046
LOC108228102	activating signal cointegrator 1 complex subunit 2 homolog	1.08687	0.0023763025096844
LOC108223114	uncharacterized protein LOC108223114 isoform X1	1.08233	0.00825534454323606
108223114	uncharacterized protein LOC108223114 isoform X1	1.08233	0.00825534454323606
LOC108206303	agamous-like MADS-box protein AGL19	1.08127	0.000237782413938032
108206303	agamous-like MADS-box protein AGL19	1.08127	0.000237782413938032
108206303	agamous-like MADS-box protein AGL19	1.08127	0.000237782413938032
LOC108209531	uncharacterized protein LOC108209531 isoform X1	1.07982	0.00775435857494913
108209531	uncharacterized protein LOC108209531 isoform X1	1.07982	0.00775435857494913
LOC108209986	uncharacterized protein LOC108209986	1.07215	0.00345508610691218
LOC108202534	uncharacterized protein LOC108202534 isoform X1	1.06757	0.00161310141468403
108202534	uncharacterized protein LOC108202534 isoform X1	1.06757	0.00161310141468403
108202534	uncharacterized protein LOC108202534 isoform X1	1.06757	0.00161310141468403
108202534	uncharacterized protein LOC108202534 isoform X1	1.06757	0.00161310141468403
108202534	uncharacterized protein LOC108202534 isoform X1	1.06757	0.00161310141468403
LOC108218835	phosphatidylinositol 4-phosphate 5-kinase 1-like	1.06743	0.00910661270322095
LOC108210140	probable glycosyltransferase At5g25310	1.06709	0.00276382359622427
LOC108214453	histone acetyltransferase MCC1-like isoform X1	1.0649	0.00371871892779734
108214453	histone acetyltransferase MCC1-like isoform X1	1.0649	0.00371871892779734
108214453	histone acetyltransferase MCC1-like isoform X1	1.0649	0.00371871892779734
108214453	histone acetyltransferase MCC1-like isoform X1	1.0649	0.00371871892779734
LOC108218713	beta-glucosidase BoGH3B-like	1.06064	0.0035900014878382
108218713	beta-glucosidase BoGH3B-like	1.06064	0.0035900014878382
LOC108224545	uncharacterized protein LOC108224545	1.0606	0.00067272931397065
LOC108227575	probable pinoresinol-lariciresinol reductase 3	1.05675	0.00268437154805525
LOC108221994	uncharacterized protein LOC108221994 isoform X1	1.05654	0.00285788477029431
108221994	uncharacterized protein LOC108221994 isoform X1	1.05654	0.00285788477029431
LOC108209941	patatin-like protein 6	1.05646	0.00923492039283749
LOC108205135	tetraketide alpha-pyrone reductase 1-like	1.05221	0.00477731794992858
LOC108202846	protein OBERON 3-like	1.05041	0.00175468582332794
LOC108209290	E3 ubiquitin-protein ligase UPL5	1.04338	0.00373503870374209
LOC108227951	transcriptional adapter ADA2	1.04236	0.000662824921330213
LOC108224125	VAMP-like protein YKT61	1.03911	0.00127256281598943
LOC108196359	protein CLT1, chloroplastic	1.03884	0.000944483861510206
LOC108210756	F-box-like/WD repeat-containing protein TBL1Y isoform X1	1.03214	0.00596807327534216
108210756	F-box-like/WD repeat-containing protein TBL1Y isoform X1	1.03214	0.00596807327534216
108210756	F-box-like/WD repeat-containing protein TBL1Y isoform X1	1.03214	0.00596807327534216
108210756	F-box-like/WD repeat-containing protein TBL1Y isoform X1	1.03214	0.00596807327534216
LOC108202694	dnaJ protein homolog 2-like	1.02755	0.00673440700866025
LOC108204417	cyclin-dependent kinase F-4-like isoform X1	1.02743	0.000810575369072642
108204417	cyclin-dependent kinase F-4-like isoform X1	1.02743	0.000810575369072642
LOC108208905	probable phospholipid hydroperoxide glutathione peroxidase	1.02448	0.00710484738535287
LOC108223543	uncharacterized protein LOC108223543	1.02388	0.00272269664439125
LOC108205923	protein CHUP1, chloroplastic	1.02243	0.00271501195508335
LOC108219134	enoyl-CoA hydratase 2, peroxisomal-like	1.0214	0.000493379830133694
LOC108214281	cytochrome b561 and DOMON domain-containing protein At3g07570	1.01969	0.00688783981312326
LOC108200238	E3 ubiquitin-protein ligase MBR2-like	1.01794	0.00728078179133417
108200238	E3 ubiquitin-protein ligase MBR2-like	1.01794	0.00728078179133417
108200238	E3 ubiquitin-protein ligase MBR2-like	1.01794	0.00728078179133417
LOC108192857	uncharacterized protein LOC108192857	1.01778	0.0073731007089908
LOC108205003	F-box protein SKIP31	1.01594	0.00203727040373526
LOC108202928	uncharacterized protein LOC108202928 isoform X1	1.01273	0.00290619656737986
108202928	uncharacterized protein LOC108202928 isoform X1	1.01273	0.00290619656737986
108202928	uncharacterized protein LOC108202928 isoform X1	1.01273	0.00290619656737986
108202928	uncharacterized protein LOC108202928 isoform X1	1.01273	0.00290619656737986
LOC108215133	uncharacterized protein LOC108215133 isoform X1	1.01184	0.00312485664671
108215133	uncharacterized protein LOC108215133 isoform X1	1.01184	0.00312485664671
LOC108215194	uncharacterized protein LOC108215194 isoform X1	1.01142	0.000221446895085424
108215194	uncharacterized protein LOC108215194 isoform X1	1.01142	0.000221446895085424
LOC108196273	E3 ubiquitin-protein ligase SINA-like 7 isoform X1	1.00115	0.00134766750637837
108196273	E3 ubiquitin-protein ligase SINA-like 7 isoform X1	1.00115	0.00134766750637837
108223591	coiled-coil domain-containing protein SCD2-like isoform X1	0.996543	0.00520935652957546
108209295	E3 SUMO-protein ligase SIZ1-like	0.993913	0.00207123139595855
108227957	kinesin-like protein KIN-7O isoform X1	0.99385	0.00209981943570611
108214421	acyl-coenzyme A oxidase 3, peroxisomal-like isoform X1	0.993039	0.0032759162838803
108197405	uncharacterized protein LOC108197405	0.98932	0.00865332710798435
108197405	uncharacterized protein LOC108197405	0.98932	0.00865332710798435
108222917	peroxisomal membrane protein 11A	0.986794	0.00809019726107688
108208794	uncharacterized protein LOC108208794 isoform X1	0.982898	0.00689556223817061
108208794	uncharacterized protein LOC108208794 isoform X1	0.982898	0.00689556223817061
108218091	BEACH domain-containing protein B isoform X1	0.961789	0.00503288721625861
108218091	BEACH domain-containing protein B isoform X1	0.961789	0.00503288721625861
108218091	BEACH domain-containing protein B isoform X1	0.961789	0.00503288721625861
108225004	uncharacterized protein LOC108225004	0.959372	0.00796178605046259
108199394	uncharacterized protein LOC108199394 isoform X1	0.939661	0.00334181021796862
108209118	uncharacterized WD repeat-containing protein C2A9.03-like isoform X1	0.907305	0.00386810960918891
108199291	phosphoglucomutase, cytoplasmic	0.902754	0.00320275633625718
108204259	phospholipid-transporting ATPase 2 isoform X1	0.887818	0.00312485664671
108227993	GBF-interacting protein 1 isoform X1	0.877264	0.00336923575799794
108227993	GBF-interacting protein 1 isoform X1	0.877264	0.00336923575799794
108227993	GBF-interacting protein 1-like isoform X1	0.877264	0.00336923575799794
108218654	G-type lectin S-receptor-like serine/threonine-protein kinase At1g34300	0.862654	0.00690782538290254
108209765	NAC domain-containing protein 78 isoform X1	0.809346	0.00777517045156786
108208906	lysine-specific demethylase lid	0.741777	0.00429171402751634
108210517	trafficking protein particle complex subunit 12	-0.764621	0.00996250080654635
108227772	UBP1-associated protein 2A	-0.853419	0.0073731007089908
108227772	UBP1-associated protein 2A	-0.853419	0.0073731007089908
LOC108224469	aspartate-semialdehyde dehydrogenase-like	-1.02964	0.00887775165432706
LOC108193834	dnaJ homolog subfamily C member 2	-1.05088	0.00179056131202264
LOC108210355	transcription factor IBH1	-1.05173	0.00556731173862163
LOC108227356	auxin response factor 19-like	-1.06306	0.0011197907592871
LOC108214979	synaptotagmin-5	-1.06378	0.00400555998656513
LOC108204768	UDP-N-acetylmuramoyl-L-alanyl-D-glutamate--2,6-diaminopimelate ligase	-1.06991	0.00453323237124339
LOC108223486	HMG1/2-like protein	-1.0763	0.00279356318361035
LOC108215104	probable trehalase isoform X1	-1.08055	0.00125314480564052
108215104	probable trehalase isoform X1	-1.08055	0.00125314480564052
108215104	probable trehalase isoform X1	-1.08055	0.00125314480564052
LOC108196147	short-chain dehydrogenase TIC 32, chloroplastic-like	-1.08421	0.00769620416177155
LOC108214320	diaminopimelate decarboxylase 1, chloroplastic-like	-1.08876	0.00862824635726614
LOC108210392	serine--tRNA ligase-like	-1.09028	0.00275354999138247
LOC108227418	uncharacterized protein LOC108227418	-1.09181	0.00880362225353112
LOC108202721	plasminogen activator inhibitor 1 RNA-binding protein-like	-1.09495	0.00818914134316832
LOC108193860	uncharacterized protein LOC108193860	-1.10295	0.00400202631705898
LOC108200025	GDP-mannose 3,5-epimerase 1	-1.10384	0.00927107709912028
LOC108216516	eukaryotic translation initiation factor 3 subunit H-like	-1.10476	0.00655929243272394
LOC108228189	vacuolar-sorting receptor 3-like	-1.10985	0.00482655533633805
LOC108224547	8-amino-7-oxononanoate synthase isoform X1	-1.11107	0.00989174181654681
108224547	8-amino-7-oxononanoate synthase isoform X1	-1.11107	0.00989174181654681
108224547	8-amino-7-oxononanoate synthase isoform X1	-1.11107	0.00989174181654681
108224547	8-amino-7-oxononanoate synthase isoform X1	-1.11107	0.00989174181654681
LOC108210608	rac-like GTP-binding protein 5	-1.11515	0.00898100582132294
LOC108220435	nucleoid-associated protein At4g30620, chloroplastic	-1.11761	0.000783082478427209
LOC108212925	MDIS1-interacting receptor like kinase 2-like	-1.11911	0.00964709041791959
LOC108202431	probable methyltransferase PMT3	-1.12535	0.000334904417212191
LOC108227393	DUF724 domain-containing protein 3-like	-1.12781	0.00617615261345305
LOC108214618	tubulin beta chain-like	-1.13078	0.009523959553716
LOC108216332	probable small nuclear ribonucleoprotein G	-1.13746	0.000583643956235047
LOC108196618	polyadenylate-binding protein RBP45	-1.14271	0.000165398834166159
LOC108216030	nascent polypeptide-associated complex subunit beta-like	-1.15091	0.00459127247251934
LOC108218775	DEAD-box ATP-dependent RNA helicase 37-like	-1.15796	0.00475931798189435
108218775	DEAD-box ATP-dependent RNA helicase 37-like	-1.15796	0.00475931798189435
LOC108208874	ribosomal RNA-processing protein 17	-1.16101	0.00968768805794467
LOC108209400	centromere-associated protein E-like	-1.16215	0.00601250324289574
LOC108225220	39S ribosomal protein L47, mitochondrial-like	-1.16226	0.00573233167993328
108225220	39S ribosomal protein L47, mitochondrial-like	-1.16226	0.00573233167993328
LOC108222723	protein TSS	-1.16418	0.00253446968096959
LOC108196902	pentatricopeptide repeat-containing protein At3g61520, mitochondrial-like	-1.16659	0.00323950683439259
108196902	pentatricopeptide repeat-containing protein At3g61520, mitochondrial-like	-1.16659	0.00323950683439259
108196902	pentatricopeptide repeat-containing protein At3g61520, mitochondrial-like	-1.16659	0.00323950683439259
LOC108210484	actin-related protein 4	-1.17116	0.00285418494933941
LOC108193997	ubiquitin receptor RAD23b	-1.17472	0.00996250080654635
LOC108210282	3-isopropylmalate dehydratase small subunit 3-like	-1.17514	0.000648668404759691
108210282	3-isopropylmalate dehydratase small subunit 3-like	-1.17514	0.000648668404759691
LOC108215790	50S ribosomal protein L22-like	-1.17631	0.00892718412005349
108215790	50S ribosomal protein L22-like	-1.17631	0.00892718412005349
LOC108200456	uncharacterized protein LOC108200456 isoform X1	-1.18175	0.00293937419624724
108200456	uncharacterized protein LOC108200456 isoform X1	-1.18175	0.00293937419624724
LOC108196686	60S ribosomal protein L23-like	-1.18225	0.00320275633625718
LOC108212891	60S ribosomal protein L19-1	-1.18727	0.00546042836777586
LOC108206099	40S ribosomal protein S11-like	-1.1896	0.00697736219901358
LOC108224111	LEC14B protein isoform X1	-1.19181	2.62610466287733e-05
108224111	LEC14B protein isoform X1	-1.19181	2.62610466287733e-05
108224111	LEC14B protein isoform X1	-1.19181	2.62610466287733e-05
LOC108227719	molybdate-anion transporter-like	-1.19246	0.00644267216358006
LOC108204405	60S ribosomal protein L18a-like	-1.19988	0.00488738750200705
LOC108206140	F-box/kelch-repeat protein At1g23390	-1.20251	0.00127256281598943
LOC108194160	60S ribosomal protein L44-like	-1.20664	0.00919508029498481
LOC108202459	LL-diaminopimelate aminotransferase, chloroplastic	-1.21019	0.00223245331176199
LOC108216431	ribosomal RNA small subunit methyltransferase NEP1-like	-1.21063	0.000633525814500883
108216431	ribosomal RNA small subunit methyltransferase NEP1-like	-1.21063	0.000633525814500883
LOC108201769	ATP-citrate synthase alpha chain protein 1	-1.21171	0.00929767571265205
LOC108199924	asparagine synthetase domain-containing protein 1	-1.21269	0.00828037609856359
LOC108199647	DNA (cytosine-5)-methyltransferase CMT2-like	-1.21469	0.00234190184274175
LOC108192912	reticulon-like protein B1	-1.2198	0.00738885497133003
LOC108215989	uncharacterized protein LOC108215989	-1.22423	0.00085390221201961
LOC108213071	uncharacterized protein LOC108213071	-1.22602	0.00778295118017575
LOC108219021	polyadenylate-binding protein 1-like isoform X1	-1.22834	0.00312147887200492
108219021	polyadenylate-binding protein 1-like isoform X1	-1.22834	0.00312147887200492
LOC108200410	histone-lysine N-methyltransferase family member SUVH9-like	-1.23268	0.00337697071874617
LOC108196463	malate dehydrogenase, chloroplastic-like	-1.2333	0.000347771289127167
LOC108224597	uncharacterized protein LOC108224597	-1.23335	0.00215189772375382
LOC108224718	peroxiredoxin-2E, chloroplastic	-1.23501	0.00199631409474417
LOC108224790	glycine-rich RNA-binding protein 4, mitochondrial-like	-1.23601	0.000640882282149099
LOC108205317	NADH dehydrogenase	-1.24269	0.00621826230476372
108205317	uncharacterized protein LOC108205317 isoform X1	-1.24269	0.00621826230476372
LOC108226561	40S ribosomal protein S16-like	-1.24316	0.00263762483274147
LOC108219726	histone deacetylase HDT1-like	-1.24434	0.00361531039604265
LOC108197512	PH domain-containing protein DDB_G0287875	-1.25015	0.00325271818151193
LOC108220385	chaperone protein dnaJ 1, mitochondrial isoform X1	-1.25059	0.000647724234056487
108220385	chaperone protein dnaJ 1, mitochondrial isoform X1	-1.25059	0.000647724234056487
LOC108219511	dehydrogenase/reductase SDR family member 12 isoform X1	-1.25166	0.00113879700417243
108219511	dehydrogenase/reductase SDR family member 12 isoform X1	-1.25166	0.00113879700417243
LOC108224873	50S ribosomal protein L13	-1.25456	0.00646850368768512
LOC108217604	uncharacterized protein LOC108217604	-1.25945	0.00252571210332845
LOC108203126	uncharacterized protein LOC108203126	-1.26017	0.000615014582407007
LOC108210468	uncharacterized protein LOC108210468	-1.26114	0.00746339881367689
LOC108223498	zinc finger CCCH domain-containing protein 24	-1.26389	0.00862426530679345
LOC108219610	40S ribosomal protein S8	-1.26869	0.00372727989999256
LOC108195948	protein RETICULATA-RELATED 3, chloroplastic-like	-1.27418	6.44611075706662e-05
LOC108210894	protein ROOT INITIATION DEFECTIVE 3 isoform X1	-1.2783	0.00596511169359949
108210894	protein ROOT INITIATION DEFECTIVE 3 isoform X1	-1.2783	0.00596511169359949
LOC108208367	ubiquitin-40S ribosomal protein S27a-like	-1.2859	0.00920911893361369
LOC108215590	uncharacterized protein LOC108215590	-1.28877	0.000312185638930445
108215590	uncharacterized protein LOC108215590	-1.28877	0.000312185638930445
LOC108207699	phospholipid--sterol O-acyltransferase-like	-1.29232	0.000511607516603731
LOC108225015	uncharacterized protein LOC108225015	-1.2941	0.00312485664671
LOC108206363	40S ribosomal protein S19-3	-1.30356	0.00459127247251934
LOC108201708	pentatricopeptide repeat-containing protein At2g02980, chloroplastic	-1.30483	0.00085435679063842
LOC108196326	2-isopropylmalate synthase A-like	-1.30543	0.00945454283162843
LOC108219894	rRNA-processing protein FYV7	-1.30972	0.00644722277936808
LOC108204688	40S ribosomal protein S14-3-like	-1.31085	0.000334316318664913
LOC108225197	60S ribosomal protein L17-2-like	-1.31152	0.000214170905843736
LOC108210440	uncharacterized protein LOC108210440	-1.31193	0.00262152703522625
LOC108220010	KRR1 small subunit processome component	-1.31302	0.000744240171246501
LOC108220923	uncharacterized protein LOC108220923	-1.31337	8.08478976659967e-06
LOC108210409	protein IQ-DOMAIN 14-like	-1.31372	0.000532426218044962
LOC108213061	DNA-directed RNA polymerases II and IV subunit 5A-like	-1.3174	0.000900653185195251
108213061	DNA-directed RNA polymerases II and IV subunit 5A-like	-1.3174	0.000900653185195251
108213061	DNA-directed RNA polymerases II and IV subunit 5A-like	-1.3174	0.000900653185195251
LOC108214674	peroxidase N1-like	-1.31775	2.63012547632534e-05
LOC108198614	ALBINO3-like protein 2, chloroplastic isoform X1	-1.31867	0.00477582523250174
108198614	uncharacterized protein LOC108198614 isoform X1	-1.31867	0.00477582523250174
108198614	ALBINO3-like protein 2, chloroplastic isoform X1	-1.31867	0.00477582523250174
LOC108196401	arginine--tRNA ligase, chloroplastic/mitochondrial-like isoform X1	-1.31882	0.00168288588825027
108196401	arginine--tRNA ligase, cytoplasmic-like isoform X1	-1.31882	0.00168288588825027
108196401	arginine--tRNA ligase, chloroplastic/mitochondrial-like isoform X1	-1.31882	0.00168288588825027
108196401	arginine--tRNA ligase, chloroplastic/mitochondrial-like isoform X1	-1.31882	0.00168288588825027
LOC108212268	G-type lectin S-receptor-like serine/threonine-protein kinase At4g27290	-1.32217	0.00553143573091786
LOC108192868	proteasome assembly chaperone 2 isoform X1	-1.32261	0.00104901282407239
108192868	proteasome assembly chaperone 2 isoform X1	-1.32261	0.00104901282407239
LOC108226572	acyl carrier protein 1, chloroplastic-like	-1.32299	0.00201356781538423
LOC108218314	40S ribosomal protein S5-like	-1.32538	0.00058900599834898
LOC108227965	transketolase, chloroplastic	-1.32828	0.00587220380428826
LOC108218803	pentatricopeptide repeat-containing protein At5g12100, mitochondrial-like	-1.33047	0.00388332747788499
LOC108204490	ATP-dependent DNA helicase At3g02060, chloroplastic	-1.33615	0.00398264050280063
LOC108218413	30S ribosomal protein S17-like	-1.34593	0.0010722742491916
108218413	30S ribosomal protein S17-like	-1.34593	0.0010722742491916
108218413	30S ribosomal protein S17-like	-1.34593	0.0010722742491916
LOC108227443	60S ribosomal protein L24-like	-1.34622	0.00337544475511621
LOC108224227	uncharacterized protein LOC108224227	-1.3498	0.00476716733724708
LOC108200805	cytochrome b5	-1.35135	0.00263547473096703
LOC108200924	40S ribosomal protein S18	-1.35208	0.000766426131139359
LOC108227650	pentatricopeptide repeat-containing protein At4g35850, mitochondrial	-1.35287	0.00699411824883254
LOC108194230	peroxidase N1-like	-1.35325	0.00606507942335256
LOC108196105	eukaryotic translation initiation factor 3 subunit D-like	-1.35326	0.00809041717472088
LOC108193500	40S ribosomal protein S15-4	-1.35512	0.000174650826810001
LOC108226452	50S ribosomal protein L11	-1.35642	0.000519042492748397
LOC108199760	eukaryotic initiation factor 4A-8	-1.35737	0.00803609153932133
LOC108211223	uncharacterized protein LOC108211223	-1.35843	0.00305446009982879
LOC108200406	high affinity nitrate transporter 2.5-like	-1.35946	0.00377511654210235
LOC108216864	protein PIN-LIKES 7 isoform X1	-1.36287	0.000260319183166345
108216864	protein PIN-LIKES 7 isoform X1	-1.36287	0.000260319183166345
LOC108225360	uncharacterized protein LOC108225360	-1.36374	2.96112118801062e-05
LOC108193141	pentatricopeptide repeat-containing protein At1g02150	-1.36406	0.000720498134458731
LOC108211427	uncharacterized protein LOC108211427	-1.36475	0.00910661270322095
LOC108209518	uncharacterized protein LOC108209518	-1.36494	0.00926371251836882
LOC108202652	uncharacterized protein At1g04910	-1.36499	0.00129590035809641
LOC108216366	adenine nucleotide transporter BT1, chloroplastic/mitochondrial-like	-1.36909	0.0031475570759915
LOC108219133	GTP-binding protein TypA/BipA homolog	-1.36956	0.00638697405638224
LOC108205796	two-pore potassium channel 3-like	-1.37602	0.00482655533633805
108205796	two-pore potassium channel 3-like	-1.37602	0.00482655533633805
LOC108200697	rRNA-processing protein fcf2-like	-1.37633	0.000473044689805926
LOC108206067	4-diphosphocytidyl-2-C-methyl-D-erythritol kinase, chloroplastic/chromoplastic	-1.37764	0.00873775978087997
LOC108215517	ras-related protein Rab7	-1.37779	0.000978089838961529
LOC108211914	G-type lectin S-receptor-like serine/threonine-protein kinase SD2-5	-1.38431	0.00258542565984259
LOC108204743	proline--tRNA ligase, cytoplasmic	-1.3845	0.00794766805089925
108204743	proline--tRNA ligase, cytoplasmic	-1.3845	0.00794766805089925
LOC108220340	WD repeat-containing protein 55	-1.38484	0.00014754886678713
LOC108208727	probable ribosome biogenesis protein RLP24	-1.38507	5.76304487147947e-05
LOC108193240	protein RETICULATA-RELATED 4, chloroplastic-like	-1.3884	0.00893937792270575
LOC108224303	protein TIC 22-like, chloroplastic	-1.39038	0.000758766428518004
LOC108199579	probable dolichyl-diphosphooligosaccharide--protein glycosyltransferase subunit 3B isoform X1	-1.39093	3.16034299316609e-05
108199579	thiamine thiazole synthase 2, chloroplastic-like isoform X1	-1.39093	3.16034299316609e-05
LOC108199919	ERBB-3 BINDING PROTEIN 1	-1.39185	0.00309885143604329
LOC108213509	protein SAWADEE HOMEODOMAIN HOMOLOG 1-like	-1.39272	0.00751960959675575
108213509	protein SAWADEE HOMEODOMAIN HOMOLOG 1-like	-1.39272	0.00751960959675575
108213509	protein SAWADEE HOMEODOMAIN HOMOLOG 1-like	-1.39272	0.00751960959675575
LOC108203100	uncharacterized protein LOC108203100	-1.39379	0.00741580689447252
LOC108209814	G-type lectin S-receptor-like serine/threonine-protein kinase SD2-5	-1.39522	0.000627521604053023
LOC108205724	protein WVD2-like 6	-1.39611	0.00147530533717295
LOC108193536	uncharacterized protein LOC108193536 isoform X1	-1.39618	0.00560531366319106
108193536	uncharacterized protein LOC108193536 isoform X1	-1.39618	0.00560531366319106
LOC108200268	50S ribosomal protein L3, chloroplastic	-1.39699	0.00531277002784617
LOC108215739	ankyrin repeat domain-containing protein EMB506, chloroplastic-like	-1.39877	0.00073166805715979
LOC108211381	60S ribosomal protein L26-1-like	-1.40146	0.00192903439184817
LOC108205839	4-hydroxy-tetrahydrodipicolinate synthase, chloroplastic-like	-1.40421	0.00340900104286115
LOC108204714	uncharacterized protein LOC108204714	-1.40425	0.00104465587131555
LOC108224986	mitochondrial inner membrane protease atp23	-1.40532	0.000324921797601351
LOC108199507	importin beta-like SAD2	-1.40678	0.00602964697209829
LOC108209611	LOW QUALITY PROTEIN: lon protease homolog 1, mitochondrial-like	-1.40698	0.000707195431477757
LOC108200439	uncharacterized protein At5g01610	-1.41167	0.00527069155900984
LOC108205466	fructose-1,6-bisphosphatase class 1	-1.41222	0.00161968459695016
LOC108211450	glycine-rich RNA-binding protein 6, mitochondrial	-1.41887	0.00221411389181819
LOC108218946	DEAD-box ATP-dependent RNA helicase 53-like	-1.41902	0.00565505324826369
LOC108198946	uncharacterized protein LOC108198946	-1.41958	0.00570653088605062
LOC108202845	dicarboxylate transporter 1, chloroplastic	-1.42014	0.00337544475511621
LOC108193746	uncharacterized protein LOC108193746	-1.4211	0.00621826230476372
LOC108225146	uncharacterized protein LOC108225146	-1.42492	0.000687906944751286
LOC108224837	putative TrmH family tRNA/rRNA methyltransferase	-1.42552	0.00350253513770053
LOC108193632	uncharacterized protein LOC108193632	-1.43368	0.000978089838961529
LOC108196407	plastidic ATP/ADP-transporter-like	-1.43397	0.00588589844537277
LOC108228181	protein ROOT PRIMORDIUM DEFECTIVE 1-like	-1.44198	0.00196207268924359
108228181	protein ROOT PRIMORDIUM DEFECTIVE 1-like	-1.44198	0.00196207268924359
108228181	protein ROOT PRIMORDIUM DEFECTIVE 1-like	-1.44198	0.00196207268924359
LOC108223527	receptor-like serine/threonine-protein kinase At1g78530	-1.44287	0.00426858486967824
108223527	receptor-like serine/threonine-protein kinase At1g78530	-1.44287	0.00426858486967824
LOC108205997	UPF0160 protein-like	-1.44521	0.000889772241677797
LOC108206732	2-methyl-6-phytyl-1,4-hydroquinone methyltransferase, chloroplastic-like	-1.4453	0.000198042056190856
LOC108208797	homeobox-leucine zipper protein REVOLUTA-like	-1.44841	0.000645182309249063
LOC108204961	bifunctional purine biosynthesis protein PurH isoform X1	-1.45163	0.00742603130722608
108204961	bifunctional purine biosynthesis protein PurH isoform X1	-1.45163	0.00742603130722608
LOC108202449	dihydrolipoyl dehydrogenase 2, chloroplastic-like	-1.45219	0.00367154714544067
LOC108219714	40S ribosomal protein S15a	-1.45274	0.000883081967767561
LOC108211417	small nuclear ribonucleoprotein SmD3b	-1.45274	0.00107747019617583
LOC108224817	L-galactose dehydrogenase	-1.45358	0.00010131017504523
LOC108218554	exosome complex component RRP45A-like	-1.45631	0.00744598457480765
LOC108209928	mitochondrial import inner membrane translocase subunit TIM44-2-like	-1.45726	0.000310013100274376
LOC108196847	probable plastidic glucose transporter 2 isoform X1	-1.45837	0.000756645633369798
108196847	probable plastidic glucose transporter 2 isoform X1	-1.45837	0.000756645633369798
108196847	probable plastidic glucose transporter 2 isoform X1	-1.45837	0.000756645633369798
108196847	probable plastidic glucose transporter 2 isoform X1	-1.45837	0.000756645633369798
LOC108206070	WD repeat-containing protein 89 homolog	-1.4585	0.0087560896809907
LOC108205193	U1 small nuclear ribonucleoprotein A	-1.45951	0.0066232945645225
LOC108210223	protein ROOT PRIMORDIUM DEFECTIVE 1	-1.45976	0.00877827410728138
LOC108199529	probable aquaporin PIP1-4	-1.46303	0.00325271818151193
LOC108197449	probable RNA methyltransferase At5g51130 isoform X1	-1.46622	0.00728909215327336
108197449	probable RNA methyltransferase At5g51130 isoform X1	-1.46622	0.00728909215327336
108197449	probable RNA methyltransferase At5g51130 isoform X1	-1.46622	0.00728909215327336
LOC108219974	CTP synthase	-1.46702	4.00021967046814e-05
LOC108222839	elongation factor 2	-1.46791	0.000759848132029382
LOC108206597	protein N-lysine methyltransferase METTL21A	-1.46837	0.00921174737159192
LOC108216228	PAN domain-containing protein At5g03700	-1.47107	0.00156215481974308
LOC108217755	pentatricopeptide repeat-containing protein At2g32630	-1.48161	0.000857953990373758
LOC108224856	40S ribosomal protein S23	-1.48277	0.000400635737376171
LOC108228056	CCA-adding enzyme isoform X1	-1.48539	0.00503654420311898
108228056	uncharacterized protein LOC108228056 isoform X1	-1.48539	0.00503654420311898
[truncated: 1,266 more rows]

## Sheet: M_CT
Table 1C. Differentially expressed sequences in blackened vs control sections (B_CT).
LOCUS	ANNOTATION	LOG2(FC)	padj.
LOC108203059	protein PLANT CADMIUM RESISTANCE 3-like	9.89878	1.00122e-60
LOC108198322	ribosome-inactivating protein luffin-alpha-like	9.64402	7.35411e-14
LOC108192765	uncharacterized protein LOC108192765 isoform X1	-0.87732	0.00478431
LOC108192765	uncharacterized protein LOC108192765 isoform X1	-0.87732	0.00478431
LOC108194152	protein PHYTOCHROME KINASE SUBSTRATE 1-like	9.31858	3.96161e-14
LOC108192766	pentatricopeptide repeat-containing protein At1g09900-like isoform X1	1.34649	0.00621503
LOC108217573	protein STRICTOSIDINE SYNTHASE-LIKE 11-like	8.97266	1.06999e-27
LOC108214649	auxin-induced protein 22D-like	8.96075	1.62657e-23
LOC108219693	protein NUCLEAR FUSION DEFECTIVE 4-like	8.57652	1.87102e-15
LOC108224502	NADP-dependent D-sorbitol-6-phosphate dehydrogenase-like	8.19416	2.17941e-32
LOC108192776	protein BONZAI 1-like isoform X1	-1.38794	5.41959e-05
LOC108208321	LOW QUALITY PROTEIN: protein ABHD17B-like	8.12406	9.73409e-11
LOC108204706	GDSL esterase/lipase At1g28580	7.90999	4.85837e-94
LOC108208348	pistil-specific extensin-like protein	7.82891	5.0474e-10
LOC108192792	glycerophosphodiester phosphodiesterase GDPD2-like isoform X1	-1.62359	2.09837e-05
LOC108200516	uncharacterized protein sll0103-like	7.78711	9.50534e-10
LOC108208184	basic leucine zipper 43-like	7.77605	7.41186e-10
LOC108192798	organic cation/carnitine transporter 7-like isoform X1	2.79589	9.27127e-06
LOC108192798	organic cation/carnitine transporter 7-like isoform X1	2.79589	9.27127e-06
LOC108217749	gibberellin-regulated protein 14-like	7.69177	1.5855e-09
LOC108198744	uncharacterized protein LOC108198744	7.61748	3.20188e-09
LOC108200819	cytokinin riboside 5\\'-monophosphate phosphoribohydrolase LOG1-like isoform X1	7.53655	3.70604e-09
LOC108212952	uncharacterized protein LOC108212952	7.52559	4.57564e-19
LOC108219740	probable pectate lyase 8	7.4811	5.82609e-09
LOC108192823	alpha-L-arabinofuranosidase 1-like	1.34295	0.00776266
LOC108220370	early nodulin-like protein 2	7.46063	5.6155e-08
LOC108224084	protein EXORDIUM-like 3	7.44819	1.32559e-11
LOC108195333	auxin transporter-like protein 2	7.43763	1.14489e-15
LOC108192834	protein DETOXIFICATION 40-like	6.35142	1.67853e-05
LOC108192834	protein DETOXIFICATION 40-like	6.35142	1.67853e-05
LOC108206997	flavin-dependent oxidoreductase FOX1-like	7.40001	6.69805e-09
LOC108224984	uncharacterized protein LOC108224984	7.39323	3.02178e-21
LOC108224507	protein WALLS ARE THIN 1-like	7.34114	4.30637e-13
LOC108192845	protoporphyrinogen oxidase, mitochondrial isoform X1	-3.73534	6.82752e-05
LOC108216724	expansin-B15-like	7.23133	8.74311e-08
LOC108195040	uncharacterized protein LOC108195040	7.22682	1.7462e-08
LOC108203135	probable carotenoid cleavage dioxygenase 4, chloroplastic	7.20609	2.10117e-08
LOC108218638	phosphoethanolamine N-methyltransferase 1-like isoform X1	7.18512	7.62779e-16
LOC108206819	(R)-limonene synthase 1-like	7.14105	4.73164e-10
LOC108227159	protein O-linked-mannose beta-1,4-N-acetylglucosaminyltransferase 2-like isoform X1	7.13238	3.44278e-08
LOC108192862	glutamate dehydrogenase B	-7.98753	1.74336e-35
LOC108224103	fasciclin-like arabinogalactan protein 2	7.12809	1.16028e-30
LOC108194895	cytochrome P450 87A3-like	7.09508	3.78439e-10
LOC108192875	calcium-dependent protein kinase 28 isoform X1	-0.839627	0.00668254
LOC108192875	calcium-dependent protein kinase 28 isoform X1	-0.839627	0.00668254
LOC108192875	calcium-dependent protein kinase 28 isoform X1	-0.839627	0.00668254
LOC108192875	calcium-dependent protein kinase 28 isoform X1	-0.839627	0.00668254
LOC108192875	calcium-dependent protein kinase 28 isoform X1	-0.839627	0.00668254
LOC108192875	calcium-dependent protein kinase 28 isoform X1	-0.839627	0.00668254
LOC108192875	calcium-dependent protein kinase 28 isoform X1	-0.839627	0.00668254
LOC108192875	calcium-dependent protein kinase 28 isoform X1	-0.839627	0.00668254
LOC108205892	protein E6-like	7.08643	3.95455e-35
LOC108221000	uncharacterized protein LOC108221000	7.08594	3.20829e-08
LOC108194334	nucleoside diphosphate kinase 1-like	7.03058	8.55197e-10
LOC108223433	L-ascorbate oxidase homolog	6.94114	1.00429e-10
LOC108200940	CASP-like protein 1	6.91778	1.52117e-10
LOC108220610	polygalacturonase inhibitor-like	6.89128	1.54399e-11
LOC108217814	probable transcription factor KAN4 isoform X1	6.88987	2.3594e-10
LOC108192900	long chain acyl-CoA synthetase 6, peroxisomal-like	-1.47749	7.57384e-05
LOC108197774	S-adenosylmethionine decarboxylase proenzyme 4-like	6.84256	2.15099e-33
LOC108195334	flowering-promoting factor 1-like protein 3	6.83858	1.87662e-07
LOC108209938	protein IQ-DOMAIN 14-like	6.82527	4.19726e-18
LOC108207046	uncharacterized protein LOC108207046	6.76464	2.04665e-06
LOC108192926	probable N-acetylglucosaminyl-phosphatidylinositol de-N-acetylase isoform X1	1.50984	0.00153705
LOC108192926	probable N-acetylglucosaminyl-phosphatidylinositol de-N-acetylase isoform X1	1.50984	0.00153705
LOC108192926	probable N-acetylglucosaminyl-phosphatidylinositol de-N-acetylase isoform X1	1.50984	0.00153705
LOC108192926	probable N-acetylglucosaminyl-phosphatidylinositol de-N-acetylase isoform X1	1.50984	0.00153705
LOC108192926	probable N-acetylglucosaminyl-phosphatidylinositol de-N-acetylase isoform X1	1.50984	0.00153705
LOC108211322	sesquiterpene synthase 2-like	6.75433	8.4256e-10
LOC108197572	uncharacterized protein LOC108197572	6.71854	9.10821e-10
LOC108202496	TMV resistance protein N-like	6.6984	1.99627e-31
LOC108214633	mechanosensitive ion channel protein 6-like	6.62477	1.93682e-06
LOC108210719	probable LRR receptor-like serine/threonine-protein kinase At5g48740	6.61866	1.27248e-18
LOC108196010	uncharacterized protein LOC108196010 isoform X1	6.60868	2.23938e-14
LOC108213453	dehydration-responsive element-binding protein 1B-like	6.60769	2.21545e-09
LOC108204812	thiamine thiazole synthase 2, chloroplastic-like	6.59344	6.88694e-34
LOC108220364	peroxidase 3-like	6.59137	7.86168e-14
LOC108223961	protein E6-like	6.57976	3.68216e-24
LOC108207509	protein DR_1172-like	6.53966	8.14934e-22
LOC108208509	zinc finger protein CONSTANS-LIKE 5-like	6.50953	8.94901e-06
LOC108192994	beta carbonic anhydrase 5, chloroplastic-like isoform X1	2.05295	7.15104e-06
LOC108216447	uncharacterized protein LOC108216447	6.50602	5.43385e-06
LOC108195395	uncharacterized protein LOC108195395	6.49144	6.31728e-06
LOC108220258	anthocyanidin 3-O-glucosyltransferase 2-like	6.49085	2.54849e-20
LOC108208540	ethylene-responsive transcription factor ERF106-like	6.47077	1.34607e-06
LOC108193003	ribosomal RNA small subunit methyltransferase B isoform X1	2.34226	0.000728632
LOC108193003	ribosomal RNA small subunit methyltransferase B isoform X1	2.34226	0.000728632
LOC108211546	UPF0481 protein At3g47200-like	6.4557	3.55009e-09
LOC108226566	probable membrane-associated kinase regulator 5	6.43724	7.03422e-12
LOC108206908	transcription factor MYC2-like	6.42913	2.85141e-23
LOC108217834	uncharacterized protein LOC108217834	6.42052	1.44377e-05
LOC108207939	iridoid synthase	6.41079	2.86677e-06
LOC108210017	beta-amylase 3, chloroplastic	6.40629	3.76368e-56
LOC108205875	transcription factor MYB59-like	6.36327	5.76087e-12
LOC108221729	leucine-rich repeat extensin-like protein 1	6.36108	1.42941e-05
LOC108222065	deacetylvindoline O-acetyltransferase-like	6.361	1.48094e-05
LOC108192834	protein DETOXIFICATION 40-like	6.35142	1.67853e-05
LOC108197655	30S ribosomal protein S1	6.35135	2.32136e-06
LOC108194323	uncharacterized protein LOC108194323	6.34467	1.532e-06
LOC108226999	IRK-interacting protein	6.32678	1.13078e-08
LOC108193053	uncharacterized protein LOC108193053 isoform X1	2.94087	0.00919979
LOC108193053	uncharacterized protein LOC108193053 isoform X1	2.94087	0.00919979
LOC108193266	serine/threonine-protein kinase BRI1-like 2	6.31464	1.07317e-13
LOC108222337	putative amidase C869.01	6.31189	2.03062e-06
LOC108197573	geranylgeranyl pyrophosphate synthase, chloroplastic-like	6.28448	1.92416e-05
LOC108210173	geranylgeranyl pyrophosphate synthase, chloroplastic-like	6.28448	1.92416e-05
LOC108194256	transcription factor bHLH93-like	6.27768	3.21716e-07
LOC108223569	fasciclin-like arabinogalactan protein 2	6.27643	1.20404e-21
LOC108223584	dirigent protein 22-like	6.27481	1.16984e-08
LOC108210607	ras-related protein RABA6a-like	6.2587	8.56871e-05
LOC108193138	cysteine synthase	-1.62904	4.93643e-05
LOC108206662	uncharacterized protein LOC108206662	6.25128	1.63792e-05
LOC108224871	uncharacterized protein LOC108224871	6.24269	2.68719e-06
LOC108220601	9-cis-epoxycarotenoid dioxygenase NCED1, chloroplastic-like	6.23527	7.32178e-22
LOC108200361	protein MARD1-like	6.21572	1.54515e-41
LOC108193149	oligouridylate-binding protein 1-like isoform X1	-1.65893	5.97256e-05
LOC108215238	probable beta-D-xylosidase 2	6.20416	9.22562e-19
LOC108225539	heat stress transcription factor B-4-like	6.18415	2.20543e-05
LOC108209529	acid beta-fructofuranosidase-like	6.17781	1.92014e-08
LOC108206455	glycine cleavage system H protein, mitochondrial	6.17533	2.83671e-08
LOC108223751	probable pectate lyase 18	6.15088	3.14639e-15
LOC108193167	uncharacterized protein LOC108193167 isoform X1	-2.83513	0.00580272
LOC108211917	probable xyloglucan endotransglucosylase/hydrolase protein 32	6.14349	3.41109e-08
LOC108197842	MDIS1-interacting receptor like kinase 2-like	6.14311	2.75481e-05
LOC108196722	BTB/POZ domain-containing protein At3g50780-like	6.13638	8.90851e-09
LOC108208609	probable carboxylesterase 15	6.12234	3.8107e-05
LOC108196883	protein NSP-INTERACTING KINASE 1-like isoform X1	6.08577	1.70546e-29
LOC108208862	tubulin beta chain-like	6.07905	2.70635e-48
LOC108220389	ABC transporter G family member 11-like	6.05603	1.00118e-05
LOC108206707	metallothionein-like protein 1	6.04361	4.37338e-05
LOC108193198	uncharacterized protein LOC108193198	5.23091	2.14336e-13
LOC108206290	uncharacterized protein LOC108206290	6.01563	8.62164e-06
LOC108201599	uncharacterized protein LOC108201599	6.01455	1.15066e-16
LOC108193210	phosphoinositide phospholipase C 2-like isoform X1	4.69448	1.4168e-14
LOC108224494	probably inactive leucine-rich repeat receptor-like protein kinase At5g06940	5.99969	5.0868e-14
LOC108194451	monocopper oxidase-like protein SKU5	5.99363	5.46938e-05
LOC108225461	protein CUP-SHAPED COTYLEDON 1-like	5.98866	1.50461e-05
LOC108208827	protein NRT1/ PTR FAMILY 6.3-like	5.95027	1.02843e-11
LOC108208277	uncharacterized protein LOC108208277	5.94959	0.000141119
LOC108193232	hydroxymethylglutaryl-CoA lyase, mitochondrial isoform X1	-1.31921	0.000764108
LOC108194005	uncharacterized protein LOC108194005	5.94591	2.01153e-26
LOC108198230	uncharacterized protein LOC108198230	5.94207	1.58018e-41
LOC108197817	guanine nucleotide-binding protein subunit gamma 3	5.91109	0.000110368
LOC108208080	uncharacterized protein LOC108208080	5.90872	5.83652e-24
LOC108193255	RNA-binding protein 42-like isoform X1	1.04177	0.00926363
LOC108193255	RNA-binding protein 42-like isoform X1	1.04177	0.00926363
LOC108211695	DELLA protein GAI-like	5.90681	9.26713e-05
LOC108193256	SNF1-related protein kinase regulatory subunit gamma-1-like	3.54677	3.21558e-06
LOC108223046	glucan endo-1,3-beta-glucosidase 3-like isoform X1	5.8974	2.18718e-09
LOC108193257	SNF1-related protein kinase regulatory subunit gamma-1-like	3.13108	0.00397425
LOC108225254	UDP-glycosyltransferase 86A1	5.8856	1.04603e-25
LOC108206785	probable WRKY transcription factor 30	5.88466	6.81545e-13
LOC108224350	protein NRT1/ PTR FAMILY 6.4-like	5.88026	9.22296e-05
LOC108220607	protein WALLS ARE THIN 1-like	5.87589	1.95621e-08
LOC108195162	uncharacterized protein LOC108195162	5.87051	1.34121e-11
LOC108211295	L-ascorbate oxidase homolog	5.85701	2.25304e-05
LOC108224308	germin-like protein subfamily 3 member 2	5.85403	7.86633e-06
LOC108214893	uncharacterized protein LOC108214893	5.85048	0.000117888
LOC108193279	high mobility group B protein 2-like isoform X1	-2.83905	0.000324267
LOC108193279	high mobility group B protein 3-like isoform X1	-2.83905	0.000324267
LOC108193279	high mobility group B protein 2-like isoform X1	-2.83905	0.000324267
LOC108193279	high mobility group B protein 3-like isoform X1	-2.83905	0.000324267
LOC108193451	polygalacturonase 1 beta-like protein 3	5.85003	6.96473e-11
LOC108193640	probable cyclin-dependent serine/threonine-protein kinase DDB_G0292550	5.84095	6.01555e-08
LOC108220552	3-epi-6-deoxocathasterone 23-monooxygenase	5.83967	9.37737e-15
LOC108193596	probable WRKY transcription factor 12	5.80296	2.72413e-09
LOC108220121	9-cis-epoxycarotenoid dioxygenase NCED1, chloroplastic-like	5.79876	4.13669e-32
LOC108211930	7-deoxyloganetic acid glucosyltransferase-like	5.79722	8.21531e-07
LOC108209256	granule-bound starch synthase 1, chloroplastic/amyloplastic	5.78979	7.71464e-71
LOC108193318	zinc finger CCCH domain-containing protein 22 isoform X1	3.80034	3.27398e-10
LOC108205150	ABC transporter G family member 11-like	5.7858	1.15279e-12
LOC108202283	basic leucine zipper 43-like	5.78282	0.000137824
LOC108193336	L-ascorbate oxidase homolog	3.30909	5.07064e-19
LOC108216000	uncharacterized GPI-anchored protein At4g28100-like	5.78126	5.01487e-09
LOC108195403	basic 7S globulin 2-like	5.77156	6.14293e-07
LOC108202554	TMV resistance protein N	5.76685	2.28459e-20
LOC108196013	leucine-rich repeat receptor-like serine/threonine-protein kinase BAM1	5.75349	2.09524e-14
LOC108219257	tropinone reductase homolog	5.75249	6.35622e-06
LOC108193360	adenine phosphoribosyltransferase 5-like isoform X1	3.6053	0.00267863
LOC108193360	adenine phosphoribosyltransferase 5-like isoform X1	3.6053	0.00267863
LOC108193360	adenine phosphoribosyltransferase 5-like isoform X1	3.6053	0.00267863
LOC108193360	adenine phosphoribosyltransferase 5-like isoform X1	3.6053	0.00267863
LOC108193360	adenine phosphoribosyltransferase 5-like isoform X1	3.6053	0.00267863
LOC108193360	adenine phosphoribosyltransferase 5-like isoform X1	3.6053	0.00267863
LOC108193360	adenine phosphoribosyltransferase 5-like isoform X1	3.6053	0.00267863
LOC108193360	adenine phosphoribosyltransferase 5-like isoform X1	3.6053	0.00267863
LOC108205231	sesquiterpene synthase 2	5.75101	1.06999e-08
LOC108198868	psoralen synthase-like	5.72702	0.000183083
LOC108227293	NDR1/HIN1-like protein 12	5.72202	1.06286e-13
LOC108193401	PI-PLC X domain-containing protein At5g67130-like isoform X1	4.98993	2.78013e-14
LOC108193401	PI-PLC X domain-containing protein At5g67130-like isoform X1	4.98993	2.78013e-14
LOC108193401	PI-PLC X domain-containing protein At5g67130-like isoform X1	4.98993	2.78013e-14
LOC108193401	PI-PLC X domain-containing protein At5g67130-like isoform X1	4.98993	2.78013e-14
LOC108216362	fasciclin-like arabinogalactan protein 9	5.7207	6.39887e-05
LOC108222005	uncharacterized protein LOC108222005	5.7129	5.57496e-08
LOC108215685	probable auxin efflux carrier component 1b	5.70992	1.2351e-06
LOC108197762	uncharacterized protein LOC108197762	5.70986	0.000184714
LOC108193438	acyl-protein thioesterase 2-like	1.28833	0.0032786
LOC108193438	acyl-protein thioesterase 2-like	1.28833	0.0032786
LOC108193438	acyl-protein thioesterase 2-like	1.28833	0.0032786
LOC108198700	dehydration-responsive element-binding protein 3-like	5.70669	3.43631e-05
LOC108220830	auxin-induced protein IAA6-like	5.6952	0.000165163
LOC108206980	uncharacterized protein LOC108206980 isoform X1	5.68743	1.78744e-11
LOC108222193	gibberellin 3-beta-dioxygenase 1-like	5.68468	0.0002275
LOC108193449	transmembrane protein 184C-like	-1.09679	5.55756e-07
LOC108193449	transmembrane protein 184C-like	-1.09679	5.55756e-07
LOC108209171	ankyrin repeat-containing protein At5g02620-like	5.67796	1.31591e-08
LOC108193450	serine carboxypeptidase-like 33 isoform X1	1.42173	0.000449587
LOC108193450	serine carboxypeptidase-like 33 isoform X1	1.42173	0.000449587
LOC108193450	serine carboxypeptidase-like 33 isoform X1	1.42173	0.000449587
LOC108196107	beta-amyrin 28-oxidase-like	5.67345	1.38719e-15
LOC108194838	pEARLI1-like lipid transfer protein 3	5.66545	0.000565672
LOC108210287	pectin acetylesterase 12-like	5.66426	6.77511e-44
LOC108193957	dof zinc finger protein DOF3.4-like	5.65717	1.06094e-30
LOC108198960	AP2-like ethylene-responsive transcription factor At1g16060	5.65615	5.44029e-05
LOC108216417	lysosomal Pro-X carboxypeptidase-like	5.65565	2.21774e-05
LOC108211084	uncharacterized protein LOC108211084	5.64783	3.9053e-74
LOC108198664	ras-related protein RABA5e-like	5.63837	5.42389e-05
LOC108201764	protein NSP-INTERACTING KINASE 3-like	5.62903	8.05584e-37
LOC108218656	phototropin-1-like isoform X1	5.62207	1.4161e-12
LOC108198722	thermospermine synthase ACAULIS5-like	5.60758	8.29844e-09
LOC108216764	aspartic proteinase nepenthesin-1	5.58292	2.34386e-10
LOC108197272	uncharacterized protein LOC108197272	5.58113	7.42983e-10
LOC108198729	transcription factor MYB3-like	5.5795	3.98299e-20
LOC108193520	homeobox-leucine zipper protein HAT22-like isoform X1	-1.1893	0.00842372
LOC108201933	ethylene-responsive transcription factor 13-like	5.57281	9.42387e-05
LOC108206873	protein IQ-DOMAIN 1-like isoform X1	5.57048	0.000770653
LOC108195542	WAT1-related protein At5g40240-like	5.55202	0.000111729
LOC108208200	uncharacterized protein LOC108208200 isoform X1	5.53695	8.65748e-05
LOC108194283	uncharacterized protein LOC108194283	5.53671	0.000487725
LOC108197197	protein phosphatase 1 regulatory subunit 12A-like	5.52174	5.82242e-15
LOC108200198	benzyl alcohol O-benzoyltransferase-like	5.51183	1.42673e-07
LOC108193536	uncharacterized protein LOC108193536 isoform X1	1.8719	1.54079e-10
LOC108204593	uncharacterized protein LOC108204593	5.51147	4.87343e-22
LOC108193540	RNA pseudouridine synthase 3, mitochondrial isoform X1	3.04694	4.68536e-08
LOC108205188	BURP domain-containing protein 3-like	5.47988	7.79408e-08
LOC108202326	calcium permeable stress-gated cation channel 1-like isoform X1	5.46698	6.53077e-14
LOC108212319	protein GLUTAMINE DUMPER 6-like	5.46625	0.000576299
LOC108193543	lipid phosphate phosphatase 1-like isoform X1	-2.56856	0.00279861
LOC108213330	putative methyltransferase DDB_G0268948	5.46157	7.87633e-10
LOC108197604	protein BIG GRAIN 1-like E	5.45578	1.24493e-16
LOC108224471	GDSL esterase/lipase At5g03610-like	5.44795	4.5886e-20
LOC108217396	uncharacterized protein LOC108217396	5.43135	9.18572e-10
LOC108193552	pantothenate kinase 1 isoform X1	-0.995033	2.91412e-05
LOC108193287	uncharacterized protein LOC108193287	5.43014	5.48228e-23
LOC108194015	thaumatin-like protein 1b	5.42991	3.18662e-30
LOC108195468	uncharacterized protein LOC108195468	5.42849	0.000984785
LOC108215786	disease resistance protein RPP13-like	5.42385	2.85675e-23
LOC108193569	graves disease carrier protein homolog isoform X1	-1.60167	5.12574e-06
LOC108221941	thaumatin-like protein 1b isoform X1	5.42241	5.47431e-19
LOC108194676	agglutinin-1-like	5.39773	2.57815e-53
LOC108193571	inactive protein kinase SELMODRAFT_444075	3.61297	0.00426396
LOC108193571	inactive protein kinase SELMODRAFT_444075	3.61297	0.00426396
LOC108193571	inactive protein kinase SELMODRAFT_444075	3.61297	0.00426396
LOC108193571	inactive protein kinase SELMODRAFT_444075	3.61297	0.00426396
LOC108193571	inactive protein kinase SELMODRAFT_444075	3.61297	0.00426396
LOC108211170	shikimate O-hydroxycinnamoyltransferase-like	5.39529	0.000702462
LOC108224301	BTB/POZ domain-containing protein At5g47800 isoform X1	5.38798	2.09255e-12
LOC108213048	ethylene-responsive transcription factor ERF039-like	5.3843	1.7558e-06
LOC108207536	uncharacterized protein LOC108207536	5.3795	0.00147443
LOC108207170	delta-latroinsectotoxin-Lt1a-like	5.37485	8.12953e-08
LOC108214667	probable inactive receptor kinase At2g26730	5.35503	7.91604e-15
LOC108209491	uncharacterized membrane protein At1g16860	5.34893	2.60377e-28
LOC108208197	transcription factor PRE6-like	5.34837	0.00119142
LOC108193616	formamidopyrimidine-DNA glycosylase isoform X1	1.30901	7.5258e-05
LOC108216740	23 kDa jasmonate-induced protein-like	5.34606	0.000296355
LOC108216750	uncharacterized GPI-anchored protein At4g28100	5.32893	3.52913e-09
LOC108210095	potassium channel AKT2/3	5.3231	1.84176e-26
LOC108215160	probable inactive leucine-rich repeat receptor-like protein kinase At1g66830 isoform X1	5.31183	0.00144082
LOC108193636	protein HESO1-like isoform X1	1.09925	0.00342733
LOC108193636	protein HESO1-like isoform X1	1.09925	0.00342733
LOC108193636	protein HESO1-like isoform X1	1.09925	0.00342733
LOC108193636	protein HESO1-like isoform X1	1.09925	0.00342733
LOC108193636	protein HESO1-like isoform X1	1.09925	0.00342733
LOC108193636	protein HESO1-like isoform X1	1.09925	0.00342733
LOC108193636	protein HESO1-like isoform X1	1.09925	0.00342733
LOC108221864	transcriptional regulator Myc-2-like	5.30964	0.000149288
LOC108206026	uncharacterized protein LOC108206026	5.30732	9.79732e-08
LOC108214929	probable xyloglucan endotransglucosylase/hydrolase protein 7	5.29828	9.29585e-06
LOC108193641	F-box/kelch-repeat protein SKIP4	-1.271	0.00172027
LOC108224394	uncharacterized protein LOC108224394	5.29549	9.37584e-12
LOC108207152	alpha-latrocrustotoxin-Lt1a-like	5.29319	2.06334e-06
LOC108211743	uncharacterized protein LOC108211743	5.28066	5.9163e-11
LOC108193658	choline/ethanolaminephosphotransferase 1-like isoform X1	3.49198	0.00163422
LOC108199845	probably inactive leucine-rich repeat receptor-like protein kinase IMK2 isoform X1	5.27961	1.64408e-13
LOC108197734	NAC domain-containing protein 7-like	5.27074	0.000368237
LOC108193663	F-box protein At5g07610-like isoform X1	1.65576	0.00422747
LOC108193663	uncharacterized protein LOC108193663 isoform X1	1.65576	0.00422747
LOC108200305	protein SIEVE ELEMENT OCCLUSION B-like	5.26504	7.4948e-09
LOC108210611	glucose-1-phosphate adenylyltransferase large subunit 1	5.25978	1.00969e-23
LOC108209268	putative receptor-like protein kinase At3g47110 isoform X1	5.25738	4.48937e-09
LOC108197654	thermospermine synthase ACAULIS5-like	5.25697	2.85927e-12
LOC108215310	carotenoid cleavage dioxygenase 8 homolog B, chloroplastic	5.25261	1.19746e-06
LOC108200696	transcription factor bHLH30 isoform X1	5.24306	1.00817e-07
LOC108193198	uncharacterized protein LOC108193198	5.23091	2.14336e-13
LOC108193692	serine carboxypeptidase-like 18 isoform X1	-9.95515	8.1034e-17
LOC108220765	peroxidase A2-like	5.21387	2.82173e-09
LOC108217633	bZIP transcription factor 27	5.21025	0.000389311
LOC108206216	abrin-b-like	5.20988	0.000766954
LOC108222002	uncharacterized protein LOC108222002	5.20798	0.000236834
LOC108199497	uncharacterized protein LOC108199497	5.18981	1.45444e-06
LOC108217821	uncharacterized protein LOC108217821	5.18779	0.00025632
LOC108207621	uncharacterized protein LOC108207621	5.17264	1.60054e-06
LOC108194120	RING-H2 finger protein ATL16-like	5.17237	3.5777e-09
LOC108193715	uncharacterized protein LOC108193715 isoform X1	-1.23509	0.000693714
LOC108196961	probable zinc transporter 10	5.17155	0.0018358
LOC108213002	protein IQ-DOMAIN 1-like	5.17013	4.78236e-12
LOC108225326	pathogenesis-related protein PR-1-like	5.16858	0.000645558
LOC108215071	leucine-rich repeat receptor-like tyrosine-protein kinase PXC3	5.16625	1.38794e-13
LOC108193724	protein SPIRAL1-like 1	2.65047	4.34916e-11
LOC108206937	agamous-like MADS-box protein AGL9 homolog	5.16612	1.73065e-06
LOC108217287	putative disease resistance RPP13-like protein 3	5.15162	1.46642e-14
LOC108208771	serine/threonine-protein phosphatase 6 regulatory ankyrin repeat subunit C-like	5.14989	3.18944e-19
LOC108205362	uncharacterized protein LOC108205362	5.14088	5.23812e-08
LOC108193735	DNA polymerase alpha subunit B-like isoform X1	1.92365	0.00330909
LOC108193735	DNA polymerase alpha subunit B-like isoform X1	1.92365	0.00330909
LOC108193735	DNA polymerase alpha subunit B-like isoform X1	1.92365	0.00330909
LOC108213275	dehydration-responsive element-binding protein 1B-like	5.13738	2.08029e-11
LOC108193740	uncharacterized protein LOC108193740 isoform X1	3.64584	1.18126e-11
LOC108211650	uncharacterized protein At5g05190-like	5.13051	2.66429e-15
LOC108194342	uncharacterized protein LOC108194342	5.1088	0.00214278
LOC108211042	probable inactive leucine-rich repeat receptor-like protein kinase At3g03770 isoform X1	5.10818	3.28953e-16
LOC108202537	deoxynucleoside triphosphate triphosphohydrolase SAMHD1 homolog isoform X1	5.10299	6.93287e-72
LOC108209898	vacuolar amino acid transporter 1-like	5.09781	1.87505e-08
LOC108193760	branched-chain-amino-acid aminotransferase 5, chloroplastic-like	-4.97971	4.4994e-33
LOC108206960	transcription factor MYC2-like	5.08472	0.000597694
LOC108205620	expansin-A4-like	5.07603	1.42574e-12
LOC108193777	probable receptor-like protein kinase At1g80640 isoform X1	-2.34828	0.00113077
LOC108196646	uncharacterized protein LOC108196646	5.07545	0.000555594
LOC108198696	uncharacterized protein LOC108198696	5.05957	4.24607e-07
LOC108204829	auxin-responsive protein IAA26-like	5.05879	4.32665e-07
LOC108210423	type I inositol polyphosphate 5-phosphatase 4	5.05523	6.55024e-09
LOC108202089	uncharacterized protein LOC108202089	5.04852	0.00517996
LOC108226657	uncharacterized protein LOC108226657	5.04676	0.000280437
LOC108218335	aquaporin PIP2-1-like	5.0466	2.93881e-12
LOC108216534	uncharacterized protein LOC108216534	5.04236	1.99194e-07
LOC108197675	uncharacterized protein LOC108197675	5.04121	0.00360662
LOC108193822	probable disease resistance protein At1g59620 isoform X1	-5.17508	4.79646e-05
LOC108217397	uncharacterized protein LOC108217397	5.01526	0.000860274
LOC108193836	rhodanese-like/PpiC domain-containing protein 12, chloroplastic isoform X1	0.973208	0.00196601
LOC108223390	uncharacterized protein LOC108223390	5.00215	0.00297912
LOC108211519	uncharacterized protein LOC108211519	5.00178	2.63431e-05
LOC108218990	glucomannan 4-beta-mannosyltransferase 2-like	4.99101	6.99916e-14
LOC108193853	BTB/POZ and TAZ domain-containing protein 3	-2.89602	0.000127111
LOC108193401	PI-PLC X domain-containing protein At5g67130-like isoform X1	4.98993	2.78013e-14
LOC108204509	polygalacturonase At1g48100	4.98943	6.44511e-16
LOC108196551	CASP-like protein 1E2	4.98902	0.000609955
LOC108209094	aquaporin TIP2-1	4.98381	2.06094e-13
LOC108204851	galactan beta-1,4-galactosyltransferase GALS3-like	4.97618	9.06817e-17
LOC108224343	tyrosine-specific transport protein 2-like isoform X1	4.96617	2.28843e-05
LOC108209122	dof zinc finger protein DOF1.7-like	4.96583	6.96473e-11
LOC108217751	uncharacterized protein LOC108217751	4.96333	0.00123044
LOC108225240	uncharacterized protein LOC108225240	4.95992	0.0007005
LOC108223430	1-aminocyclopropane-1-carboxylate oxidase	4.9583	3.44281e-67
LOC108216768	gibberellin-regulated protein 11-like	4.95234	1.34577e-06
LOC108193902	probable sugar phosphate/phosphate translocator At3g17430	2.6617	0.000851909
LOC108210055	F-box protein At3g44326-like	4.94709	0.00105169
LOC108193907	uncharacterized protein LOC108193907 isoform X1	1.16206	0.00011895
LOC108225486	tyrosine-specific transport protein 2-like isoform X1	4.94628	2.51602e-05
LOC108220577	transcription factor bHLH35-like	4.93524	6.41993e-20
LOC108199230	uncharacterized protein LOC108199230	4.9352	0.00578811
LOC108193935	uncharacterized protein LOC108193935 isoform X1	-1.76291	0.00386497
LOC108193935	uncharacterized protein LOC108193935 isoform X1	-1.76291	0.00386497
LOC108209002	uncharacterized protein LOC108209002	4.92501	8.81397e-07
LOC108199627	uncharacterized protein LOC108199627	4.91537	0.00759995
LOC108215516	probable auxin efflux carrier component 1c	4.91244	1.19455e-07
LOC108226810	transcription repressor OFP6	4.90875	0.0041551
LOC108204462	uncharacterized protein LOC108204462	4.90199	0.00441444
LOC108199137	ethylene-responsive transcription factor ERF022-like	4.89892	1.24486e-06
LOC108199268	ethylene-responsive transcription factor ERF022-like	4.89892	1.24486e-06
LOC108220773	methylesterase 17-like	4.89703	7.49975e-07
LOC108198902	abrin-b-like	4.8956	4.88514e-67
LOC108216136	9-cis-epoxycarotenoid dioxygenase NCED3, chloroplastic	4.89447	2.01228e-08
LOC108194047	nuclear transcription factor Y subunit A-3 isoform X1	4.89432	5.01199e-26
LOC108213205	putative lipid-transfer protein DIR1	4.89261	0.00483264
LOC108197503	auxin-responsive protein IAA12	4.89067	0.000686098
LOC108194522	snakin-2-like	4.87967	8.49334e-08
LOC108219915	uncharacterized protein LOC108219915	4.87695	0.000600969
LOC108224070	uncharacterized protein LOC108224070	4.86767	0.000934302
LOC108194003	uncharacterized protein LOC108194003	-1.55691	4.43153e-06
LOC108194003	uncharacterized protein LOC108194003	-1.55691	4.43153e-06
LOC108194003	uncharacterized protein LOC108194003	-1.55691	4.43153e-06
LOC108218479	thaumatin-like protein	4.85118	0.00146154
LOC108194005	uncharacterized protein LOC108194005	5.94591	2.01153e-26
LOC108195013	uncharacterized protein LOC108195013	4.8502	8.45654e-09
LOC108219820	amino acid permease 6-like	4.84228	1.33864e-11
LOC108206390	homeobox-leucine zipper protein HAT7-like	4.83771	0.00205219
LOC108194012	solute carrier family 25 member 44-like isoform X1	-1.97742	0.000609955
LOC108211232	hyphally regulated cell wall protein 3	4.83728	1.85721e-07
LOC108213307	uncharacterized protein LOC108213307	4.83383	4.51823e-05
LOC108211404	MDIS1-interacting receptor like kinase 2-like isoform X1	4.82859	0.00658882
LOC108217711	protein trichome birefringence-like	4.81155	2.38103e-07
LOC108194025	putative disease resistance protein RGA3	-2.83302	0.00112401
LOC108204403	protein indeterminate-domain 12-like	4.80768	0.00241981
LOC108194026	biotin carboxylase 1, chloroplastic-like	2.43588	4.59327e-07
LOC108211620	dof zinc finger protein DOF3.4-like	4.8007	1.46274e-05
LOC108217704	transcription factor bHLH106	4.79768	0.00156182
LOC108227912	BTB/POZ domain-containing protein At1g03010 isoform X1	4.79632	0.000879396
LOC108212819	F-box protein At2g27310-like	4.7943	3.35583e-05
LOC108215392	PLASMODESMATA CALLOSE-BINDING PROTEIN 2-like	4.79371	8.66011e-17
LOC108214659	receptor-like protein 12	4.79263	5.28602e-05
LOC108205416	uncharacterized protein LOC108205416	4.78958	8.39091e-06
LOC108194047	nuclear transcription factor Y subunit A-3 isoform X1	4.89432	5.01199e-26
LOC108194047	nuclear transcription factor Y subunit A-3 isoform X1	4.89432	5.01199e-26
LOC108194047	nuclear transcription factor Y subunit A-3 isoform X1	4.89432	5.01199e-26
LOC108216285	mediator of RNA polymerase II transcription subunit 15-like	4.77992	6.42115e-31
LOC108219840	early nodulin-like protein 2	4.77724	2.85223e-08
LOC108227629	subtilisin-like protease SBT1.5	4.77351	1.07105e-08
LOC108211300	cytokinin dehydrogenase 1-like	4.77151	2.56978e-05
LOC108199010	cytochrome P450 CYP72A219-like	4.76056	0.00235061
LOC108206177	AP2-like ethylene-responsive transcription factor TOE3 isoform X1	4.75656	4.65062e-12
LOC108219851	protein IQ-DOMAIN 14-like	4.75504	2.51007e-06
LOC108203227	pleiotropic drug resistance protein 1-like	4.75393	3.78559e-28
LOC108215750	carboxyl-terminal-processing peptidase 3, chloroplastic isoform X1	4.74929	3.30374e-11
LOC108200836	transcription factor TCP15-like	4.74715	2.80083e-07
LOC108200847	transcription factor TCP15-like	4.74715	2.80083e-07
LOC108194001	transcription factor PIF7-like	4.74177	0.00118876
LOC108200267	uncharacterized protein LOC108200267	4.74049	1.91373e-09
LOC108210736	gibberellin-regulated protein 6-like	4.7362	2.19981e-12
LOC108218429	polygalacturonase	4.73377	0.000281046
LOC108195451	gibberellin 2-beta-dioxygenase 2-like	4.73012	1.22601e-05
LOC108193273	probable inactive leucine-rich repeat receptor-like protein kinase At3g03770	4.72946	2.52432e-16
LOC108200070	uncharacterized protein LOC108200070	4.72716	1.93109e-59
LOC108217765	RING-H2 finger protein ATL46	4.72709	8.00948e-05
LOC108216728	RNA-binding protein 38-like	4.72659	5.95083e-09
LOC108207172	glutathionyl-hydroquinone reductase YqjG isoform X1	4.72141	3.83418e-49
LOC108215960	protein NRT1/ PTR FAMILY 4.5-like	4.71998	0.00120819
LOC108220976	wall-associated receptor kinase 2-like	4.71687	0.000235401
LOC108194141	uncharacterized protein LOC108194141 isoform X1	-6.19045	8.80361e-17
LOC108196501	CSC1-like protein At1g32090	4.71115	1.4168e-14
LOC108215754	teosinte glume architecture 1-like isoform X1	4.69469	1.74357e-14
LOC108193210	phosphoinositide phospholipase C 2-like isoform X1	4.69448	1.4168e-14
LOC108211482	omega-hydroxypalmitate O-feruloyl transferase	4.69024	5.29701e-31
LOC108209397	O-glucosyltransferase rumi homolog isoform X1	4.68078	1.87124e-14
LOC108220247	uncharacterized protein LOC108220247	4.67505	1.13015e-07
LOC108207174	serine/threonine-protein phosphatase 6 regulatory ankyrin repeat subunit B-like	4.67297	3.96706e-05
LOC108220956	probable 2-oxoglutarate-dependent dioxygenase AOP1	4.66368	1.38287e-09
LOC108194158	7-deoxyloganetin glucosyltransferase-like isoform X1	-2.04563	1.06888e-05
LOC108197599	uncharacterized protein LOC108197599	4.65467	0.00952019
LOC108194164	LRR receptor-like serine/threonine-protein kinase FEI 1 isoform X1	2.73971	0.000410315
LOC108223807	uncharacterized protein LOC108223807	4.65163	6.5557e-29
LOC108203037	filament-like plant protein 7	4.6492	2.20501e-16
LOC108197849	uncharacterized protein LOC108197849	4.64773	1.09458e-06
LOC108207864	mavicyanin-like	4.64408	7.00496e-06
LOC108201960	subtilisin-like protease SBT1.6	4.6428	4.69669e-24
LOC108197179	induced stolen tip protein TUB8-like	4.63679	2.67819e-08
LOC108222122	probable pectinesterase 53	4.63393	1.96589e-08
LOC108202680	GDSL esterase/lipase At1g09390	4.62225	1.73992e-07
LOC108226424	24-methylenesterol C-methyltransferase 2-like	4.61836	0.00483492
LOC108211900	protein LYK2	4.61771	8.28081e-05
LOC108220290	uncharacterized protein At4g14100-like	4.6156	7.16487e-05
LOC108210129	uncharacterized protein LOC108210129	4.61311	1.64026e-30
LOC108227707	plant UBX domain-containing protein 10-like	4.61035	1.49586e-13
LOC108227092	probable LRR receptor-like serine/threonine-protein kinase At2g16250	4.61029	1.67729e-29
LOC108227811	CSC1-like protein RXW8	4.60369	1.41278e-12
LOC108227768	peroxidase 73-like	4.59878	9.95045e-18
LOC108194270	glutamine--tRNA ligase-like isoform X1	-4.7151	2.80302e-24
LOC108227845	uncharacterized protein LOC108227845 isoform X1	4.59852	5.83095e-14
LOC108194271	glutamate--glyoxylate aminotransferase 2 isoform X1	-3.57977	6.78814e-07
LOC108220630	WUSCHEL-related homeobox 4 isoform X1	4.59702	0.000116282
LOC108194272	heparanase-like protein 2 isoform X1	-8.17528	5.9222e-07
LOC108219351	hippocampus abundant transcript 1 protein-like	4.5932	1.78002e-20
LOC108221887	BEL1-like homeodomain protein 9	4.58397	0.000421983
LOC108212099	uncharacterized protein LOC108212099	4.58316	0.0048294
LOC108199153	TVP38/TMEM64 family membrane protein slr0305-like	4.58303	7.04675e-06
LOC108204650	sulfate transporter 3.1	4.57864	8.35212e-06
LOC108221111	auxin-induced protein 22A-like	4.57819	0.00272349
LOC108208346	protein LE25-like	4.56837	0.00495163
LOC108221638	proline-rich receptor-like protein kinase PERK2	4.56463	7.84331e-10
LOC108217737	RING-H2 finger protein ATL52	4.56214	3.24342e-08
LOC108210835	glucan endo-1,3-beta-glucosidase 14	4.5606	1.55716e-06
LOC108194320	ethylene-responsive transcription factor ERF113-like isoform X1	2.71472	3.76003e-07
LOC108217080	uncharacterized protein LOC108217080	4.53915	2.12729e-13
LOC108226908	uncharacterized protein LOC108226908 isoform X1	4.53448	0.000247022
LOC108194327	uncharacterized protein LOC108194327 isoform X1	-5.57543	2.34279e-14
LOC108194327	uncharacterized protein LOC108194327 isoform X1	-5.57543	2.34279e-14
LOC108205844	GDSL esterase/lipase At4g01130	4.5283	2.91147e-06
LOC108193034	root phototropism protein 3-like	4.52716	8.95933e-43
LOC108225314	fasciclin-like arabinogalactan protein 7	4.52265	7.07393e-05
LOC108227288	ABC transporter G family member 22-like isoform X1	4.52186	1.9146e-11
LOC108220653	cytochrome P450 76A2-like	4.51812	7.28649e-17
LOC108196145	WAT1-related protein At3g30340-like	4.51121	0.00414867
LOC108219680	fimbrin-2-like	4.51097	2.59896e-09
LOC108207153	ankyrin-3-like	4.48483	3.56224e-07
LOC108197092	BTB/POZ domain-containing protein At1g67900	4.48087	1.68817e-13
LOC108199289	probable pectinesterase 68	4.48081	0.00499067
LOC108209360	photosystem II reaction center W protein, chloroplastic-like isoform X1	4.47414	1.65105e-10
LOC108194380	protein REVERSION-TO-ETHYLENE SENSITIVITY1 isoform X1	-1.68014	0.00240476
LOC108194380	protein REVERSION-TO-ETHYLENE SENSITIVITY1 isoform X1	-1.68014	0.00240476
LOC108213245	F-box/FBD/LRR-repeat protein At1g13570-like	4.47295	9.83202e-17
LOC108216783	protein DETOXIFICATION 48-like	4.46624	0.000344304
LOC108225052	pectate lyase-like	4.4587	2.9684e-06
LOC108222462	zinc finger Ran-binding domain-containing protein 2-like isoform X1	4.45695	0.00408233
LOC108226237	protein MARD1-like	4.45281	4.49495e-06
LOC108210374	G-type lectin S-receptor-like serine/threonine-protein kinase At4g27290	4.4456	3.58291e-05
LOC108212808	protein FAF-like, chloroplastic	4.43094	0.00851368
LOC108215092	dehydration-responsive element-binding protein 1B-like	4.43003	7.28e-06
LOC108194451	monocopper oxidase-like protein SKU5	5.99363	5.46938e-05
LOC108209341	uncharacterized protein LOC108209341	4.42578	8.44898e-05
LOC108224082	lysine histidine transporter-like 8	4.42565	2.475e-05
LOC108220175	carboxylesterase 1-like	4.41289	1.23332e-06
LOC108215241	uncharacterized protein LOC108215241 isoform X1	4.40921	0.00652078
LOC108210070	protein ASPARTIC PROTEASE IN GUARD CELL 1	4.40445	1.50462e-14
LOC108194481	tyrosine-specific transport protein-like isoform X1	2.28162	1.50952e-06
LOC108194481	tyrosine-specific transport protein 2-like isoform X1	2.28162	1.50952e-06
LOC108194481	tyrosine-specific transport protein 2-like isoform X1	2.28162	1.50952e-06
LOC108194481	tyrosine-specific transport protein-like isoform X1	2.28162	1.50952e-06
LOC108194481	tyrosine-specific transport protein-like isoform X1	2.28162	1.50952e-06
LOC108214091	protein ABIL2	4.40072	1.0507e-06
LOC108222025	AP2-like ethylene-responsive transcription factor TOE3	4.39911	0.00889414
LOC108216645	uncharacterized protein LOC108216645	4.39685	9.65945e-06
LOC108223291	cold-shock protein CS120-like	4.3891	2.7868e-27
LOC108205328	protein SYM1-like	4.38738	8.46355e-09
LOC108215358	putative ABC transporter B family member 8	4.38721	1.27827e-19
LOC108207476	uncharacterized protein LOC108207476	4.38524	8.89522e-12
LOC108226335	transcription repressor OFP12-like	4.37705	0.00720897
LOC108212143	probable LRR receptor-like serine/threonine-protein kinase At3g47570	4.37698	0.00401206
LOC108218127	feruloyl CoA ortho-hydroxylase 1-like	4.37592	2.10036e-05
LOC108221446	uncharacterized protein LOC108221446	4.37527	0.00776545
LOC108224755	uncharacterized protein LOC108224755	4.37444	2.84431e-10
LOC108205885	uncharacterized protein LOC108205885	4.3734	9.57317e-14
LOC108194083	uncharacterized protein LOC108194083	4.36975	5.71038e-07
LOC108216446	monoterpene synthase-like	4.36889	2.86447e-16
LOC108225794	uncharacterized protein LOC108225794	4.36464	0.000492479
LOC108194673	protein argonaute 10-like isoform X1	1.08233	0.000287237
LOC108211661	uncharacterized protein LOC108211661	4.36281	4.50924e-08
LOC108220359	uncharacterized protein LOC108220359	4.35587	5.19799e-14
LOC108206629	protein LURP-one-related 4-like	4.3544	6.7777e-08
LOC108211065	uncharacterized protein At5g41620-like	4.35416	1.21238e-20
LOC108192967	uncharacterized protein LOC108192967	4.35373	0.000291946
LOC108193819	dof zinc finger protein DOF5.6	4.34593	4.08335e-08
LOC108202801	probable boron transporter 2	4.33894	1.14139e-07
LOC108194741	transcription initiation factor TFIID subunit 10-like	-2.5321	2.03715e-10
LOC108194741	transcription initiation factor TFIID subunit 10-like	-2.5321	2.03715e-10
LOC108194741	transcription initiation factor TFIID subunit 10-like	-2.5321	2.03715e-10
LOC108194741	transcription initiation factor TFIID subunit 10-like	-2.5321	2.03715e-10
LOC108222251	protein SENESCENCE-ASSOCIATED GENE 21, mitochondrial-like	4.33856	0.000311535
LOC108210770	F-box protein CPR30-like isoform X1	4.33234	1.88389e-21
LOC108220758	protein IQ-DOMAIN 14-like	4.32547	1.35973e-07
LOC108211452	dof zinc finger protein DOF2.1-like	4.32536	6.21914e-16
LOC108212010	bidirectional sugar transporter SWEET1-like	4.32191	0.000527137
LOC108212022	bidirectional sugar transporter SWEET1-like	4.32191	0.000527137
LOC108192801	putative glycine-rich cell wall structural protein 1	4.32013	5.37447e-10
LOC108207649	transcription factor MYC2-like	4.31757	2.55353e-06
LOC108211777	dehydration-responsive element-binding protein 1A-like	4.31645	1.15932e-06
LOC108220040	probable beta-1,3-galactosyltransferase 2	4.31415	0.000583086
LOC108218349	probable LRR receptor-like serine/threonine-protein kinase At1g53440	4.3066	9.87307e-29
LOC108204758	paramyosin-like	4.30432	1.2391e-18
LOC108211294	uncharacterized protein LOC108211294	4.30357	1.79697e-05
LOC108210750	disease resistance protein At4g27190-like	4.29883	1.12133e-06
LOC108224714	myosin-2-like	4.2962	7.88219e-10
LOC108225002	protein trichome birefringence-like isoform X1	4.2943	0.000620837
LOC108227357	uncharacterized protein LOC108227357 isoform X1	4.28906	7.7644e-07
LOC108224844	expansin-B3-like	4.28827	3.87432e-07
LOC108195482	uncharacterized protein LOC108195482	4.28582	0.00589461
LOC108194898	B3 domain-containing transcription factor VRN1-like isoform X1	2.42931	0.00312659
LOC108227352	uncharacterized protein LOC108227352 isoform X1	4.28198	8.42917e-07
LOC108208252	ethylene-responsive transcription factor ERF027-like	4.27411	4.89719e-06
LOC108216334	uncharacterized protein LOC108216334 isoform X1	4.2707	8.53945e-05
LOC108200920	DNA-damage-repair/toleration protein DRT100-like	4.27011	0.0085618
LOC108194918	protein SULFUR DEFICIENCY-INDUCED 1-like isoform X1	-8.09993	2.07779e-14
LOC108217669	uncharacterized protein LOC108217669 isoform X1	4.26762	1.25502e-17
LOC108220017	disease resistance protein RPP13-like	4.26454	4.31875e-13
LOC108199770	protein argonaute 10-like isoform X1	4.2623	1.37037e-09
LOC108205016	low affinity sulfate transporter 3-like	4.25269	2.54352e-10
LOC108204913	peroxidase 42	4.23493	1.04415e-12
LOC108224086	mannan endo-1,4-beta-mannosidase 7	4.23463	0.00630238
LOC108210874	transcription factor DIVARICATA	4.23396	2.79007e-07
LOC108196305	F-box protein At2g02240-like isoform X1	4.23175	0.00858482
LOC108204876	transcription factor HBI1-like isoform X1	4.22814	0.00579287
LOC108207259	thioredoxin M-type, chloroplastic-like	4.22717	0.00827454
LOC108226733	uncharacterized protein LOC108226733 isoform X1	4.22701	7.25576e-05
LOC108214707	subtilisin-like protease SBT1.7	4.22166	5.78231e-12
LOC108212908	uncharacterized protein LOC108212908	4.21883	0.00786027
LOC108210580	BTB/POZ domain-containing protein At1g03010-like	4.21619	6.45019e-08
LOC108197683	protein RALF-like 24	4.21549	6.66788e-05
LOC108214642	subtilisin-like protease SBT1.7	4.21224	0.00181997
LOC108220910	cycloeucalenol cycloisomerase-like	4.20941	6.11224e-11
LOC108219352	hippocampus abundant transcript-like protein 1	4.20723	0.000407623
LOC108195089	G-type lectin S-receptor-like serine/threonine-protein kinase At4g27290 isoform X1	-4.2927	0.000122634
LOC108195089	G-type lectin S-receptor-like serine/threonine-protein kinase At4g27290 isoform X1	-4.2927	0.000122634
LOC108227525	nucleobase-ascorbate transporter 3-like	4.20668	9.31554e-13
LOC108219782	transcription factor bHLH35-like	4.19584	2.44497e-09
LOC108195105	uncharacterized protein LOC108195105 isoform X1	2.12999	2.61068e-15
LOC108195105	uncharacterized protein LOC108195105 isoform X1	2.12999	2.61068e-15
LOC108195105	uncharacterized protein LOC108195105 isoform X1	2.12999	2.61068e-15
LOC108196172	proline-rich receptor-like protein kinase PERK14	4.19454	0.00692437
LOC108195107	uncharacterized protein LOC108195107 isoform X1	2.11435	2.19787e-05
LOC108195107	uncharacterized protein LOC108195107 isoform X1	2.11435	2.19787e-05
LOC108204448	uncharacterized protein LOC108204448	4.18832	3.03745e-09
LOC108215055	protein FAF-like, chloroplastic	4.18819	0.00012656
LOC108195117	LEAF RUST 10 DISEASE-RESISTANCE LOCUS RECEPTOR-LIKE PROTEIN KINASE-like 1.2 isoform X1	-2.01259	0.0044929
LOC108195117	LEAF RUST 10 DISEASE-RESISTANCE LOCUS RECEPTOR-LIKE PROTEIN KINASE-like 1.3 isoform X1	-2.01259	0.0044929
LOC108205283	leucine-rich repeat receptor-like serine/threonine-protein kinase BAM3	4.18584	4.34331e-09
LOC108225746	ABSCISIC ACID-INSENSITIVE 5-like protein 7	4.18206	2.55848e-07
LOC108222886	uncharacterized protein LOC108222886	4.18099	6.81776e-11
LOC108210815	uncharacterized protein LOC108210815	4.17671	0.000514431
LOC108195134	receptor-like protein kinase FERONIA isoform X1	-3.49373	0.00312659
LOC108227245	21 kDa protein-like	4.17584	7.24718e-14
LOC108199798	auxin efflux carrier component 7-like	4.1698	1.74835e-07
LOC108195148	homeobox-leucine zipper protein HOX1 isoform X1	-4.04654	0.000985171
LOC108195148	homeobox-leucine zipper protein HOX1 isoform X1	-4.04654	0.000985171
LOC108226408	aspartyl protease AED1-like	4.16849	0.000200783
LOC108213365	uncharacterized protein LOC108213365 isoform X1	4.16579	0.000231833
LOC108220835	calmodulin-like protein 3	4.16558	1.73428e-10
LOC108199870	type IV inositol polyphosphate 5-phosphatase 3-like	4.16345	0.00227267
LOC108213219	gibberellin-regulated protein 14	4.16257	0.00150029
LOC108211855	WUSCHEL-related homeobox 4-like	4.15775	0.00116792
LOC108193057	cytochrome P450 78A6-like	4.15473	0.00822344
LOC108211334	transcription factor bHLH62-like	4.15024	4.15087e-05
LOC108213970	putative disease resistance RPP13-like protein 3	4.1486	0.00823848
LOC108208276	uncharacterized protein LOC108208276	4.14776	9.51504e-05
LOC108211091	protein PHLOEM PROTEIN 2-LIKE A1-like	4.14468	0.000154742
LOC108219746	LOW QUALITY PROTEIN: mitogen-activated protein kinase homolog NTF6	4.14249	2.73115e-07
LOC108194249	uncharacterized protein LOC108194249	4.14139	0.000134801
LOC108218464	protein WALLS ARE THIN 1-like	4.14003	0.0027215
LOC108217702	uncharacterized protein LOC108217702	4.13562	0.00914417
LOC108223623	receptor-like serine/threonine-protein kinase ALE2 isoform X1	4.13406	0.00148809
LOC108215266	uncharacterized protein LOC108215266	4.12969	0.000241136
LOC108217602	probable galacturonosyltransferase 15 isoform X1	4.12671	3.35139e-06
LOC108206843	transcription factor DIVARICATA-like	4.12365	0.000687164
LOC108199823	F-box protein CPR30-like	4.12199	0.0082538
LOC108221595	dehydration-responsive element-binding protein 1B-like	4.12085	0.00140665
LOC108211599	peroxidase 51-like	4.11315	0.000721008
LOC108195242	uncharacterized protein LOC108195242 isoform X1	1.4911	9.50212e-08
LOC108217778	uncharacterized protein LOC108217778	4.11175	2.01219e-12
LOC108195153	zinc finger protein 354B-like	4.10813	2.59228e-10
LOC108210237	ABC transporter G family member 11-like	4.10788	0.00068346
LOC108202350	uncharacterized protein LOC108202350	4.10784	0.00176723
LOC108228184	protein PLASTID MOVEMENT IMPAIRED 1	4.10534	3.42051e-06
LOC108195264	uncharacterized protein LOC108195264	-5.4294	4.16312e-07
LOC108195264	uncharacterized protein LOC108195264	-5.4294	4.16312e-07
LOC108195264	uncharacterized protein LOC108195264	-5.4294	4.16312e-07
LOC108204639	protein NRT1/ PTR FAMILY 1.2-like	4.10368	1.6767e-13
LOC108206910	sucrose-binding protein-like	4.10274	6.01651e-15
LOC108222068	HVA22-like protein j	4.10102	0.00022301
LOC108205069	homeobox-leucine zipper protein ATHB-14-like isoform X1	4.09993	1.81756e-07
LOC108206878	gibberellin 2-beta-dioxygenase 8	4.09993	1.60242e-05
LOC108220952	flavonol synthase/flavanone 3-hydroxylase-like	4.09932	0.00036174
LOC108213162	uncharacterized protein LOC108213162	4.09588	0.00383568
LOC108216150	pleiotropic drug resistance protein 1-like	4.09494	5.03576e-06
LOC108203122	probable pectate lyase 8	4.09017	0.00929298
LOC108204401	CASP-like protein 2B2	4.08779	9.64868e-09
LOC108196280	putative glucose-6-phosphate 1-epimerase	4.0868	0.000430231
LOC108195074	LOW QUALITY PROTEIN: protein LIGHT-DEPENDENT SHORT HYPOCOTYLS 4	4.08595	1.42389e-06
LOC108214375	squamosa promoter-binding-like protein 6 isoform X1	4.0855	2.90028e-23
LOC108219868	patellin-6-like	4.0811	8.37287e-05
LOC108210680	uncharacterized protein LOC108210680 isoform X1	4.08064	9.35838e-30
LOC108224616	glucose-1-phosphate adenylyltransferase large subunit 1-like	4.0775	6.37983e-05
LOC108209818	uncharacterized protein LOC108209818 isoform X1	4.07638	7.9659e-09
LOC108215207	blue copper protein-like	4.07477	5.00788e-12
LOC108208413	protein NDR1-like	4.07195	7.65023e-07
LOC108225230	uncharacterized protein LOC108225230	4.06791	2.29706e-05
LOC108211716	uncharacterized protein LOC108211716	4.06695	1.10036e-10
LOC108195410	uncharacterized protein LOC108195410 isoform X1	-9.36741	4.97631e-06
LOC108217036	uncharacterized protein LOC108217036	4.06306	8.94889e-05
LOC108210725	cytochrome P450 90A1	4.05617	0.00268182
LOC108202998	VAN3-binding protein-like	4.05073	5.46825e-09
LOC108200638	cyclin-U4-1	4.04822	2.58897e-05
LOC108222080	uncharacterized protein LOC108222080	4.04149	3.30908e-09
LOC108210986	probable folate-biopterin transporter 7	4.04073	1.19647e-18
LOC108206172	PLASMODESMATA CALLOSE-BINDING PROTEIN 4	4.03867	0.00236529
LOC108212195	amino acid permease 6-like	4.03816	2.43082e-08
LOC108194463	uncharacterized protein LOC108194463	4.03403	5.50315e-10
LOC108218169	cytochrome P450 76A1-like	4.03371	8.93959e-05
LOC108224282	rho GTPase-activating protein 5-like	4.03352	1.95413e-12
LOC108200188	mucin-2-like	4.03299	1.07753e-06
LOC108216699	homeobox-leucine zipper protein HDG11-like	4.02919	1.75376e-06
LOC108205883	lipid phosphate phosphatase 2-like	4.02778	1.41632e-08
LOC108195527	LEAF RUST 10 DISEASE-RESISTANCE LOCUS RECEPTOR-LIKE PROTEIN KINASE-like 2.1 isoform X1	3.45195	0.00776545
LOC108204599	BON1-associated protein 2-like	4.02564	0.00027427
LOC108200716	AAA-ATPase At4g30250-like	4.02404	0.00113096
LOC108215333	uncharacterized protein LOC108215333 isoform X1	4.02364	8.14693e-05
LOC108206207	nudix hydrolase 8-like	4.02328	0.00114807
LOC108224100	geraniol 8-hydroxylase-like	4.01617	0.00201083
LOC108197558	phosphoinositide phospholipase C 2-like	4.01586	1.37934e-10
LOC108199012	ethylene-responsive transcription factor ERF017-like	4.01343	0.00183616
LOC108202834	protein NRT1/ PTR FAMILY 1.2-like	4.01278	1.90967e-10
LOC108219447	glyceraldehyde-3-phosphate dehydrogenase B, chloroplastic-like	4.00728	2.48487e-05
LOC108200588	early nodulin-like protein 1	4.00385	1.34182e-10
LOC108195635	agamous-like MADS-box protein AGL15 isoform X1	3.10255	0.00140006
LOC108210585	mechanosensitive ion channel protein 6-like	3.99514	1.36335e-19
LOC108220412	probable auxin efflux carrier component 1b	3.99418	0.00279492
LOC108216411	transcription factor bHLH94-like	3.99013	5.93845e-07
LOC108200754	transcription factor MYB86-like	3.98477	4.09646e-08
LOC108200761	transcription factor MYB86-like	3.98477	4.09646e-08
LOC108225526	uncharacterized protein LOC108225526	3.97806	0.00343469
LOC108219666	von Willebrand factor A domain-containing protein DDB_G0292028-like isoform X1	3.97653	3.45241e-07
LOC108195771	staphylococcal nuclease domain-containing protein 1-like isoform X1	-0.929094	0.000116746
LOC108210224	pleiotropic drug resistance protein 1-like	3.97305	6.35909e-07
LOC108195779	glycine-rich domain-containing protein 1-like isoform X1	-3.30945	4.05869e-16
LOC108195779	glycine-rich domain-containing protein 1-like isoform X1	-3.30945	4.05869e-16
LOC108195779	glycine-rich domain-containing protein 1-like isoform X1	-3.30945	4.05869e-16
LOC108195779	glycine-rich domain-containing protein 1-like isoform X1	-3.30945	4.05869e-16
LOC108215131	VAN3-binding protein-like	3.97272	0.00312006
LOC108195806	ABC transporter C family member 3-like	-2.96001	4.62009e-07
LOC108211480	uncharacterized protein LOC108211480	3.9684	0.00126789
LOC108215533	serine/threonine-protein kinase STY46-like	3.96787	3.61807e-14
LOC108211054	metalloendoproteinase 1-like	3.9657	0.000252466
LOC108219452	transcription factor BEE 3-like isoform X1	3.96223	0.00283927
LOC108212520	receptor-like cytosolic serine/threonine-protein kinase RBK1 isoform X1	3.96096	9.07123e-07
LOC108195822	G-type lectin S-receptor-like serine/threonine-protein kinase At4g27290 isoform X1	-5.71109	4.52534e-08
LOC108213316	transcription factor BEE 3-like	3.95931	0.00302246
LOC108216042	uncharacterized protein LOC108216042	3.95787	0.00429217
LOC108195825	G-type lectin S-receptor-like serine/threonine-protein kinase At4g27290 isoform X1	-7.98616	6.85839e-08
LOC108212691	MDIS1-interacting receptor like kinase 2	3.95689	0.000371533
LOC108220428	metallothionein-like protein type 2	3.95677	3.13756e-06
LOC108224618	protein SMAX1-LIKE 4	3.95584	1.41335e-05
LOC108199174	uncharacterized protein LOC108199174	3.95559	0.0018176
LOC108195852	protein CHUP1, chloroplastic isoform X1	2.36345	1.56197e-06
LOC108195852	protein CHUP1, chloroplastic isoform X1	2.36345	1.56197e-06
LOC108195852	protein CHUP1, chloroplastic isoform X1	2.36345	1.56197e-06
LOC108224729	WUSCHEL-related homeobox 11	3.95501	0.00373415
LOC108204384	homeobox-leucine zipper protein ATHB-6	3.95414	0.000325971
LOC108216065	AP2-like ethylene-responsive transcription factor AIL1	3.95396	0.000267053
LOC108207764	dammarenediol II synthase-like	3.94894	1.00297e-08
LOC108212126	probable protein phosphatase 2C 38, partial	3.93855	2.23447e-08
LOC108195893	pyridoxal kinase isoform X1	-2.0461	1.5113e-07
LOC108205114	branched-chain-amino-acid aminotransferase-like protein 2	3.93642	2.63025e-43
LOC108227904	65-kDa microtubule-associated protein 1	3.93216	9.96907e-17
LOC108195896	peptidyl-prolyl cis-trans isomerase-like isoform X1	-7.68117	2.72011e-14
LOC108197880	uncharacterized protein LOC108197880	3.92288	0.00153191
LOC108211957	LOW QUALITY PROTEIN: protein SUPPRESSOR OF GENE SILENCING 3-like	3.91955	2.84383e-14
LOC108217872	homeobox-leucine zipper protein HAT22-like	3.91209	7.00326e-09
LOC108225476	probable NAD(P)H dehydrogenase (quinone) FQR1-like 1	3.90891	1.14229e-06
LOC108219822	histone acetyltransferase KAT6B-like	3.90351	1.79619e-05
LOC108211455	terpene synthase 10-like	3.90298	1.16723e-34
LOC108220360	transcription repressor OFP1-like	3.90252	3.25893e-12
LOC108220720	SPX domain-containing protein 1	3.90106	6.50901e-14
LOC108205616	metallothionein-like protein type 2	3.8998	0.00148191
LOC108211083	probably inactive leucine-rich repeat receptor-like protein kinase IMK2	3.89718	1.17148e-06
LOC108195943	alanine aminotransferase 1, mitochondrial isoform X1	1.34661	0.00709435
LOC108195943	alanine aminotransferase 1, mitochondrial isoform X1	1.34661	0.00709435
LOC108195943	alanine aminotransferase 1, mitochondrial isoform X1	1.34661	0.00709435
LOC108195943	alanine aminotransferase 1, mitochondrial isoform X1	1.34661	0.00709435
LOC108215972	fasciclin-like arabinogalactan protein 4	3.89446	1.40489e-15
LOC108219757	cytochrome P450 71A1-like	3.89284	9.42387e-05
LOC108210047	rhodanese-like domain-containing protein 4, chloroplastic	3.89019	3.20359e-08
LOC108195958	uncharacterized protein LOC108195958 isoform X1	1.04889	2.65245e-06
LOC108195958	uncharacterized protein LOC108195958 isoform X1	1.04889	2.65245e-06
LOC108195958	uncharacterized protein LOC108195958 isoform X1	1.04889	2.65245e-06
LOC108200848	purple acid phosphatase 23	3.88999	0.00062027
LOC108212303	putative disease resistance RPP13-like protein 3	3.88654	2.87946e-10
LOC108195963	auxilin-like protein 1 isoform X1	1.08385	0.00749741
LOC108219060	glucose-1-phosphate adenylyltransferase small subunit, chloroplastic/amyloplastic	3.88021	7.27665e-08
LOC108195966	serine/threonine-protein kinase ATM isoform X1	1.61917	3.4261e-07
LOC108195966	serine/threonine-protein kinase ATM isoform X1	1.61917	3.4261e-07
LOC108212759	probable protein phosphatase 2C 6	3.87918	0.00523899
LOC108195978	inactive leucine-rich repeat receptor-like protein kinase CORYNE isoform X1	2.35275	2.04003e-05
LOC108217494	uncharacterized protein LOC108217494	3.87629	1.80007e-08
LOC108195979	protein NEOXANTHIN-DEFICIENT 1 isoform X1	0.838682	0.00187856
LOC108195979	protein NEOXANTHIN-DEFICIENT 1 isoform X1	0.838682	0.00187856
LOC108210511	PLASMODESMATA CALLOSE-BINDING PROTEIN 2-like	3.87264	1.62273e-07
LOC108195981	choline-phosphate cytidylyltransferase 1-like isoform X1	1.77716	0.000125196
LOC108195981	choline-phosphate cytidylyltransferase 1-like isoform X1	1.77716	0.000125196
LOC108208009	uncharacterized protein LOC108208009	3.86783	0.00358814
LOC108220920	transcription factor bHLH35-like	3.86709	0.00225732
LOC108195991	plasma membrane ATPase 1-like	-1.84188	0.000371533
LOC108195991	plasma membrane ATPase 1-like	-1.84188	0.000371533
LOC108199421	uncharacterized protein LOC108199421	3.86449	9.32011e-11
LOC108210030	armadillo repeat-containing kinesin-like protein 1 isoform X1	3.86446	3.19613e-07
LOC108208716	7-deoxyloganetin glucosyltransferase-like	3.8617	0.000829524
LOC108213209	probable serine incorporator	3.85947	5.50913e-05
LOC108195999	protein RMD5 homolog A	-0.791428	0.000332838
LOC108195999	protein RMD5 homolog A	-0.791428	0.000332838
LOC108200617	SNF1-related protein kinase regulatory subunit beta-2	3.85893	2.79333e-12
LOC108228044	F-box protein CPR30-like	3.84261	0.00171388
LOC108196009	B3 domain-containing transcription repressor VAL2-like isoform X1	2.35693	1.39693e-05
LOC108196009	B3 domain-containing protein Os07g0679700-like isoform X1	2.35693	1.39693e-05
LOC108223808	root phototropism protein 2	3.84251	2.82861e-20
LOC108196010	uncharacterized protein LOC108196010 isoform X1	6.60868	2.23938e-14
LOC108196010	uncharacterized protein LOC108196010 isoform X1	6.60868	2.23938e-14
LOC108205645	pollen-specific protein SF21-like isoform X1	3.84174	4.46644e-06
LOC108196012	CDPK-related protein kinase-like isoform X1	2.87474	4.76758e-13
LOC108206034	aspartyl protease family protein At5g10770-like	3.83837	5.84473e-06
LOC108213042	myb-like protein J	3.83635	4.71844e-05
LOC108226315	pEARLI1-like lipid transfer protein 3	3.83582	0.000102235
LOC108224360	cytochrome c1-like isoform X1	3.83199	1.7828e-08
LOC108199651	protein trichome birefringence-like 38	3.8312	0.00517453
LOC108210994	photosystem I reaction center subunit XI, chloroplastic	3.83104	1.37366e-05
LOC108214243	protein MIZU-KUSSEI 1-like	3.81933	1.14385e-06
LOC108196049	uncharacterized protein LOC108196049 isoform X1	-5.4809	5.62632e-09
LOC108196049	uncharacterized protein LOC108196049 isoform X1	-5.4809	5.62632e-09
LOC108196049	uncharacterized protein LOC108196049 isoform X1	-5.4809	5.62632e-09
LOC108196049	uncharacterized protein LOC108196049 isoform X1	-5.4809	5.62632e-09
LOC108196049	uncharacterized protein LOC108196049 isoform X1	-5.4809	5.62632e-09
LOC108196049	uncharacterized protein LOC108196049 isoform X1	-5.4809	5.62632e-09
LOC108208895	alpha-glucan phosphorylase, H isozyme isoform X1	3.80901	1.66451e-22
LOC108220859	uncharacterized protein LOC108220859	3.80611	3.69658e-06
LOC108196066	cell wall protein RBR3	-1.0648	0.00959662
LOC108214895	probable purine permease 4	3.80384	7.03986e-07
LOC108196070	DNA polymerase delta catalytic subunit-like isoform X1	3.04465	7.02504e-06
LOC108215995	uncharacterized protein LOC108215995	3.80368	1.00042e-09
LOC108193318	zinc finger CCCH domain-containing protein 22 isoform X1	3.80034	3.27398e-10
LOC108206025	transcription factor bHLH30-like	3.79853	8.38197e-05
LOC108206539	homeobox-leucine zipper protein HAT4	3.79846	2.08927e-22
LOC108196094	metal transporter Nramp1	-4.35169	2.05061e-06
LOC108214223	beta-glucosidase BoGH3B-like	3.79524	0.00901641
LOC108214483	pyruvate kinase isozyme G, chloroplastic-like	3.7945	0.00558024
LOC108224555	cationic peroxidase 2-like	3.79245	0.000991539
LOC108201881	probable E3 ubiquitin-protein ligase RHA4A	3.79245	0.000407069
LOC108220631	GATA transcription factor 2-like	3.792	9.42387e-05
LOC108220761	GATA transcription factor 2-like	3.792	9.42387e-05
LOC108196127	DEAD-box ATP-dependent RNA helicase 7-like isoform X1	-1.12551	0.000170973
LOC108196127	DEAD-box ATP-dependent RNA helicase 7-like isoform X1	-1.12551	0.000170973
LOC108196127	DEAD-box ATP-dependent RNA helicase 7-like isoform X1	-1.12551	0.000170973
LOC108196127	DEAD-box ATP-dependent RNA helicase 7-like isoform X1	-1.12551	0.000170973
LOC108196127	DEAD-box ATP-dependent RNA helicase 7-like isoform X1	-1.12551	0.000170973
LOC108196127	DEAD-box ATP-dependent RNA helicase 7-like isoform X1	-1.12551	0.000170973
LOC108196127	DEAD-box ATP-dependent RNA helicase 7-like isoform X1	-1.12551	0.000170973
LOC108196127	DEAD-box ATP-dependent RNA helicase 7-like isoform X1	-1.12551	0.000170973
LOC108196127	DEAD-box ATP-dependent RNA helicase 7-like isoform X1	-1.12551	0.000170973
LOC108211608	ethylene-responsive transcription factor CRF4-like	3.79114	1.16567e-08
LOC108196129	autophagy-related protein 16-like	1.49399	3.76684e-08
LOC108196129	autophagy-related protein 16-like	1.49399	3.76684e-08
LOC108196129	autophagy-related protein 16-like	1.49399	3.76684e-08
LOC108224123	L-ascorbate oxidase-like	3.7884	0.00176869
LOC108224754	uncharacterized protein LOC108224754	3.78781	8.05802e-05
LOC108212093	1,4-alpha-glucan-branching enzyme 2-2, chloroplastic/amyloplastic	3.78678	8.76818e-18
LOC108200512	protein SHOOT GRAVITROPISM 5-like	3.78332	6.51487e-05
LOC108210949	probable pectate lyase 8	3.77162	5.76679e-06
LOC108202570	putative serine carboxypeptidase-like 23	3.7679	6.61292e-21
LOC108217361	cytosolic sulfotransferase 13-like	3.75523	0.00172299
LOC108225447	UDP-glycosyltransferase 90A1	3.75408	0.000262024
LOC108196154	putative ion channel POLLUX-like 2 isoform X1	2.40476	5.07551e-13
LOC108196154	putative ion channel POLLUX-like 2 isoform X1	2.40476	5.07551e-13
LOC108196154	putative ion channel POLLUX-like 2 isoform X1	2.40476	5.07551e-13
LOC108196154	putative ion channel POLLUX-like 2 isoform X1	2.40476	5.07551e-13
LOC108196154	putative ion channel POLLUX-like 2 isoform X1	2.40476	5.07551e-13
LOC108196154	putative ion channel POLLUX-like 2 isoform X1	2.40476	5.07551e-13
LOC108196154	putative ion channel POLLUX-like 2 isoform X1	2.40476	5.07551e-13
LOC108196154	putative ion channel POLLUX-like 2 isoform X1	2.40476	5.07551e-13
LOC108208613	CSC1-like protein At4g02900	3.75163	0.000226712
LOC108197183	cleavage and polyadenylation specificity factor subunit 3-II	3.7512	9.14399e-14
LOC108208118	TATA-binding protein-associated factor 2N isoform X1	3.75065	0.00158676
LOC108196168	protein PLASTID MOVEMENT IMPAIRED 1-RELATED 1	-1.14385	0.00132666
LOC108196168	protein PLASTID MOVEMENT IMPAIRED 1-RELATED 1	-1.14385	0.00132666
LOC108214651	endoglucanase 17-like	3.74921	1.23047e-07
LOC108225430	dehydration-responsive element-binding protein 1B-like	3.74745	0.00236065
LOC108211478	UDP-glycosyltransferase 90A1-like	3.74663	0.00224818
LOC108196185	heat shock 70 kDa protein 14-like isoform X1	-0.871428	0.00137475
LOC108206081	protein EXORDIUM-like 5	3.74294	1.22437e-05
LOC108196198	histidine kinase 4-like isoform X1	-5.40753	7.76108e-33
LOC108213968	putative disease resistance RPP13-like protein 3 isoform X1	3.74139	4.63682e-09
LOC108206437	growth-regulating factor 9-like	3.74119	1.53227e-17
LOC108223545	leucine-rich repeat receptor-like protein kinase TDR	3.74077	2.57792e-05
LOC108196206	phosphoglucomutase, cytoplasmic-like	-2.84836	2.11975e-06
LOC108217839	dof zinc finger protein DOF1.2	3.7404	2.73344e-10
LOC108196210	vam6/Vps39-like protein isoform X1	1.39781	0.00135582
LOC108196210	vam6/Vps39-like protein isoform X1	1.39781	0.00135582
LOC108196210	vam6/Vps39-like protein isoform X1	1.39781	0.00135582
LOC108220584	uncharacterized protein LOC108220584	3.73987	0.00595481
LOC108193939	plastidal glycolate/glycerate translocator 1, chloroplastic-like	3.73495	5.49286e-06
LOC108198278	uncharacterized protein LOC108198278	3.73167	2.09576e-10
LOC108196228	uncharacterized protein LOC108196228 isoform X1	2.11378	1.85575e-07
LOC108196228	uncharacterized protein LOC108196228 isoform X1	2.11378	1.85575e-07
LOC108194091	sucrose nonfermenting 4-like protein	3.72934	2.14368e-07
LOC108204779	ankyrin repeat-containing protein At5g02620-like	3.72923	0.00152585
LOC108217762	probable membrane-associated kinase regulator 5	3.72405	0.00113327
LOC108196261	biotin carboxyl carrier protein of acetyl-CoA carboxylase-like isoform X1	-1.94134	0.00242206
LOC108196261	biotin carboxyl carrier protein of acetyl-CoA carboxylase-like isoform X1	-1.94134	0.00242206
LOC108205605	protein kinase APK1A, chloroplastic-like	3.72384	3.48588e-11
LOC108198805	non-specific lipid-transfer protein	3.7221	0.00101812
LOC108215410	endo-1,3;1,4-beta-D-glucanase-like	3.72025	5.49617e-25
LOC108221029	dirigent protein 22-like isoform X1	3.71831	0.0023605
LOC108194102	cytochrome P450 94B3-like	3.71276	2.5928e-53
LOC108208842	DNA-damage-repair/toleration protein DRT100-like	3.71123	0.000881703
LOC108227497	two pore calcium channel protein 1A-like	3.71022	3.47897e-05
LOC108202429	187-kDa microtubule-associated protein AIR9	3.70424	3.16045e-10
LOC108220308	peptidyl-prolyl cis-trans isomerase FKBP18, chloroplastic	3.70411	1.28732e-08
LOC108196286	probable RNA helicase SDE3	1.65628	2.54304e-06
LOC108202976	probable peroxygenase 4	3.70403	0.00068726
LOC108211465	protein CUP-SHAPED COTYLEDON 3-like isoform X1	3.70396	2.83325e-06
LOC108216671	uncharacterized protein LOC108216671	3.70209	0.00334807
LOC108208238	kiwellin-like	3.70176	0.00266437
LOC108196305	F-box protein At2g02240-like isoform X1	4.23175	0.00858482
LOC108210071	uncharacterized protein LOC108210071 isoform X1	3.69184	6.67338e-30
LOC108217925	WEB family protein At1g75720	3.69145	1.91175e-09
LOC108196308	6-phosphogluconate dehydrogenase, decarboxylating 3	-1.83279	0.000777731
LOC108209458	beta-galactosidase	3.69108	2.13157e-05
LOC108205263	peptidyl-prolyl cis-trans isomerase FKBP17-1, chloroplastic isoform X1	3.68877	1.81073e-06
LOC108196312	uncharacterized protein LOC108196312	2.88933	0.00225732
LOC108213045	putative dual specificity protein phosphatase DSP8	3.68578	0.000600969
LOC108197755	repetitive proline-rich cell wall protein-like	3.68561	0.001695
LOC108204991	uncharacterized protein LOC108204991	3.68385	0.000572388
LOC108219705	probable xyloglucan endotransglucosylase/hydrolase protein 32	3.67613	0.00404812
LOC108204987	uncharacterized protein LOC108204987	3.67488	1.64018e-07
LOC108215810	protein PIN-LIKES 3-like	3.67347	7.22467e-13
LOC108196337	nucleobase-ascorbate transporter 6-like isoform X1	3.12684	5.0584e-08
LOC108196337	nucleobase-ascorbate transporter 6-like isoform X1	3.12684	5.0584e-08
LOC108196337	nucleobase-ascorbate transporter 6-like isoform X1	3.12684	5.0584e-08
LOC108196337	nucleobase-ascorbate transporter 6-like isoform X1	3.12684	5.0584e-08
LOC108196337	nucleobase-ascorbate transporter 6-like isoform X1	3.12684	5.0584e-08
LOC108193493	delta(12)-fatty-acid desaturase FAD2-like	3.66852	0.000125138
LOC108200261	uncharacterized protein LOC108200261	3.66522	0.00131914
LOC108196349	uncharacterized protein LOC108196349	-1.43758	0.00242529
LOC108200103	uncharacterized protein LOC108200103	3.66368	1.57953e-37
LOC108208715	7-deoxyloganetin glucosyltransferase-like	3.65843	0.00124497
LOC108225200	LOW QUALITY PROTEIN: cytochrome P450 94A1	3.65792	1.75127e-05
LOC108200710	uncharacterized protein LOC108200710	3.65761	0.00439713
LOC108214568	protein LONGIFOLIA 1-like isoform X1	3.6573	0.0025253
LOC108201938	random slug protein 5	3.65239	6.81365e-05
LOC108211526	probable glycerol-3-phosphate acyltransferase 3	3.65102	7.96344e-07
LOC108193740	uncharacterized protein LOC108193740 isoform X1	3.64584	1.18126e-11
LOC108226624	MADS-box transcription factor 6-like isoform X1	3.64577	4.97186e-08
LOC108213073	cytochrome B5-like protein isoform X1	3.64274	1.05071e-05
LOC108196378	uncharacterized protein LOC108196378 isoform X1	0.919255	0.000260302
LOC108196378	uncharacterized protein LOC108196378 isoform X1	0.919255	0.000260302
LOC108210813	probable protein S-acyltransferase 4	3.64095	2.51547e-13
LOC108216798	heavy metal-associated isoprenylated plant protein 20	3.62841	1.04056e-06
LOC108196416	probable protein phosphatase 2C 40	1.34971	2.6085e-06
LOC108196416	probable protein phosphatase 2C 40	1.34971	2.6085e-06
LOC108196416	probable protein phosphatase 2C 40	1.34971	2.6085e-06
LOC108196416	probable protein phosphatase 2C 40	1.34971	2.6085e-06
LOC108206792	fibrous sheath CABYR-binding protein-like	3.62645	0.00579846
LOC108209781	SPX domain-containing membrane protein At4g22990-like	3.62498	1.02407e-10
LOC108196428	sucrose synthase-like	-10.0422	2.62538e-20
LOC108196428	sucrose synthase-like	-10.0422	2.62538e-20
LOC108216517	vestitone reductase-like	3.61702	5.18544e-08
LOC108196432	transcription initiation factor TFIID subunit 9-like	3.48731	6.03622e-13
LOC108196432	transcription initiation factor TFIID subunit 9-like	3.48731	6.03622e-13
LOC108193571	inactive protein kinase SELMODRAFT_444075	3.61297	0.00426396
LOC108196434	lysophospholipid acyltransferase 1-like isoform X1	-1.36906	2.4024e-07
LOC108196434	lysophospholipid acyltransferase 1-like isoform X1	-1.36906	2.4024e-07
LOC108197429	RPM1-interacting protein 4-like isoform X1	3.6117	3.30628e-05
LOC108196444	protein argonaute 10-like isoform X1	3.23724	1.86491e-22
LOC108196444	protein argonaute 10-like isoform X1	3.23724	1.86491e-22
LOC108196444	protein argonaute 10-like isoform X1	3.23724	1.86491e-22
LOC108196444	protein argonaute 10-like isoform X1	3.23724	1.86491e-22
LOC108196444	protein argonaute 10-like isoform X1	3.23724	1.86491e-22
LOC108227604	protein translocase subunit SecA-like	3.60837	0.00139286
LOC108196445	sphingosine kinase 1-like isoform X1	-4.01395	1.62273e-07
LOC108193360	adenine phosphoribosyltransferase 5-like isoform X1	3.6053	0.00267863
LOC108213130	inositol hexakisphosphate and diphosphoinositol-pentakisphosphate kinase 1-like isoform X1	3.60508	2.28379e-07
LOC108211287	uncharacterized protein At5g48480-like	3.60417	0.0050825
LOC108209322	O-glucosyltransferase rumi homolog	3.60388	2.22559e-06
LOC108196458	UV-B-induced protein At3g17800, chloroplastic isoform X1	1.52809	0.00783656
LOC108215141	protein NRT1/ PTR FAMILY 5.6-like	3.60324	1.33352e-10
LOC108196468	probable serine/threonine-protein kinase At1g54610 isoform X1	2.57319	3.72743e-06
LOC108206817	formin-like protein CG32138	3.59941	0.000497453
LOC108210489	serine carboxypeptidase-like 25	3.59447	0.000939438
LOC108197425	putative receptor-like protein kinase At3g47110	3.59277	0.00623411
LOC108204595	uncharacterized protein LOC108204595 isoform X1	3.5927	0.0048339
LOC108220757	serine carboxypeptidase-like 45	3.59129	5.79488e-05
LOC108196923	phosphate transporter PHO1	3.58622	5.23812e-08
LOC108193534	uncharacterized protein LOC108193534	3.58502	2.75271e-13
LOC108225315	uncharacterized protein LOC108225315	3.58483	0.00261997
LOC108208172	glutaredoxin-C10-like	3.584	1.06852e-05
LOC108224384	protein EXORDIUM-like 2	3.58019	1.10265e-06
LOC108196499	BTB/POZ domain-containing protein At2g46260 isoform X1	-0.83961	9.54685e-05
LOC108223882	methyl-CpG-binding domain-containing protein 7-like isoform X1	3.57995	1.49499e-06
LOC108193863	peroxidase 10-like	3.57975	0.000431754
LOC108196509	BTB/POZ domain-containing protein NPY5	3.24749	1.11958e-08
LOC108196509	BTB/POZ domain-containing protein NPY5	3.24749	1.11958e-08
LOC108225556	cysteine proteinase COT44-like	3.57946	0.0026597
LOC108220212	auxin-responsive protein IAA16-like	3.57871	1.47066e-17
LOC108196515	ninja-family protein mc410	-1.00582	0.00223884
LOC108210653	auxin-responsive protein IAA16-like	3.57754	0.00187283
LOC108196518	sodium/hydrogen exchanger 2-like	-1.34002	1.56076e-06
LOC108197038	zinc finger CCCH domain-containing protein 20	3.57747	8.97561e-11
LOC108196523	F-box protein SKIP2	-1.37963	0.00077865
LOC108199187	pumilio homolog 1-like	3.57747	1.01144e-06
LOC108208915	endoglucanase 6	3.57732	4.70633e-05
LOC108196525	pentatricopeptide repeat-containing protein At3g22470, mitochondrial-like	1.3172	0.00281519
LOC108202926	probable receptor-like serine/threonine-protein kinase At5g57670	3.5737	0.0091038
LOC108226082	uncharacterized protein LOC108226082	3.57154	1.44462e-05
LOC108215374	xyloglucan endotransglucosylase/hydrolase protein 9-like	3.57146	0.00153646
LOC108210675	alpha carbonic anhydrase 1, chloroplastic-like	3.56992	0.00307634
LOC108204596	uncharacterized protein LOC108204596	3.56895	0.00684278
LOC108196554	uncharacterized protein LOC108196554	2.12836	1.56728e-06
LOC108206642	protein FAF-like, chloroplastic	3.56818	0.00013658
LOC108209856	enoyl	3.56154	1.57438e-05
LOC108214526	uncharacterized protein LOC108214526 isoform X1	3.56051	1.23985e-10
LOC108205133	aspartyl protease family protein At5g10770-like	3.55909	5.92758e-08
LOC108227304	transcription factor bHLH74	3.55724	1.60092e-20
LOC108200885	uncharacterized protein LOC108200885	3.55619	5.64879e-06
LOC108213281	dehydration-responsive element-binding protein 1E-like	3.55579	0.00448385
LOC108224461	AP2-like ethylene-responsive transcription factor ANT	3.55566	0.00199723
LOC108196588	U-box domain-containing protein 5	-0.877872	0.00143156
LOC108218665	uncharacterized protein LOC108218665	3.55559	0.000637327
LOC108193524	zinc-finger homeodomain protein 10-like	3.55531	0.0063216
LOC108195818	MAR-binding filament-like protein 1-1	3.54967	6.2106e-28
LOC108193256	SNF1-related protein kinase regulatory subunit gamma-1-like	3.54677	3.21558e-06
LOC108207095	probable disease resistance protein At1g59620	3.54507	8.94395e-06
LOC108220979	dynein light chain LC6, flagellar outer arm	3.54382	0.00169063
LOC108210011	serine carboxypeptidase-like 20	3.54285	0.000165311
LOC108205601	uncharacterized protein LOC108205601	3.54217	3.48791e-07
LOC108196625	transcription factor HBP-1b(c38)-like	-1.13989	0.00195735
LOC108202851	mediator of RNA polymerase II transcription subunit 33A-like isoform X1	3.54163	1.94164e-11
LOC108200727	uncharacterized protein LOC108200727 isoform X1	3.54086	2.01153e-26
LOC108196631	ribonuclease J isoform X1	1.64228	0.0015553
LOC108196631	ribonuclease J isoform X1	1.64228	0.0015553
LOC108196631	ribonuclease J isoform X1	1.64228	0.0015553
LOC108205179	ABC transporter G family member 25	3.53994	1.14395e-05
LOC108195186	heavy metal-associated isoprenylated plant protein 3-like	3.53826	0.00183616
LOC108225520	BURP domain protein USPL1-like	3.53807	1.75608e-07
LOC108196647	probable polyol transporter 6	-4.22835	0.00169073
LOC108220076	auxin-responsive protein IAA26-like	3.53735	1.88347e-36
LOC108196651	protein DA1-related 1	1.13188	0.00106725
LOC108196651	protein DA1-related 1	1.13188	0.00106725
LOC108196651	protein DA1-related 1	1.13188	0.00106725
LOC108221283	protein PHYTOCHROME KINASE SUBSTRATE 4-like	3.53625	8.58785e-08
LOC108225020	dof zinc finger protein DOF5.4	3.53476	0.00105023
LOC108210583	probable glycerol-3-phosphate acyltransferase 3	3.53363	0.000111073
LOC108205368	dof zinc finger protein DOF1.4 isoform X1	3.5322	8.75992e-05
LOC108196655	uncharacterized protein LOC108196655 isoform X1	-2.30927	0.000784347
LOC108196655	uncharacterized protein LOC108196655 isoform X1	-2.30927	0.000784347
LOC108211790	uncharacterized protein At5g65660-like	3.52929	0.00211687
LOC108214687	serine/threonine-protein kinase At5g01020-like	3.52871	7.39431e-19
LOC108196660	protein SPT2 homolog isoform X1	-0.566646	0.000591207
LOC108203807	probable leucine-rich repeat receptor-like protein kinase At5g49770	3.52863	1.01788e-24
LOC108213294	uncharacterized protein LOC108213294	3.52517	2.67063e-08
LOC108196666	eukaryotic peptide chain release factor subunit 1-3	-1.54701	4.51693e-07
LOC108204535	fibrous sheath CABYR-binding protein-like isoform X1	3.51915	2.04157e-09
LOC108211356	glucan endo-1,3-beta-glucosidase 8-like	3.51501	0.000456277
LOC108195861	pyrophosphate-energized vacuolar membrane proton pump	3.51171	0.00107038
LOC108227577	BTB/POZ domain-containing protein NPY2-like	3.50729	0.000656211
LOC108223802	glutamate receptor 3.5-like	3.5068	9.12841e-08
LOC108224276	chaperone protein dnaJ A6, chloroplastic-like isoform X1	3.50498	0.000567297
LOC108196690	alpha-1,3-mannosyl-glycoprotein 2-beta-N-acetylglucosaminyltransferase isoform X1	0.877169	6.55117e-05
LOC108196138	agamous-like MADS-box protein AGL12	3.5044	0.00172732
LOC108225642	alpha-mannosidase-like	3.50277	1.30967e-07
[truncated: 6,733 more rows]
